## 1 SUPPLEMENTARY MATERIALS

### 2 Box S1: Death review process in STAMPEDE

A programme was developed to assess data from the death forms, SAE forms and progression forms in order to automatically classify the cause of death. If the death met any of the following criteria it was considered a prostate cancer death or non-prostate cancer death as appropriate.

#### **Prostate cancer deaths:**

Any death where an FFS event was reported prior to death and any of the following was also true:

- Prostate cancer was reported as the primary cause of death and there were no secondary causes reported and there was no evidence of any other cancer reported as an SAE
- Primary cause of death was pneumonia with prostate cancer as a secondary cause of death
- Primary cause of death was neutropenic sepsis and a secondary cause of death was prostate cancer
- Primary cause of death was carcinomatosis and a secondary cause of death was prostate cancer
- Death was reported as caused by prostate cancer treatment

#### **Non-prostate cancer deaths:**

- Primary cause of death was reported as another primary cancer and confirmed as an SAE report
- Primary cause of death was reported as cardiovascular disease and prostate cancer was not listed as a secondary cause of death.

Deaths which did not meet the criteria to be automatically categorised were clinically reviewed. There were 901 deaths reported in total, out of which 594 (66%) were able to have the cause of death automatically classified using the rules defined above; the remaining 301 (34%) deaths had cause of death clinically reviewed.

3

4 **Table S1: Numbers of patients reporting starting additional treatment, by trial arm**

|                                   | Control |      | Docetaxel |      |
|-----------------------------------|---------|------|-----------|------|
| Randomised                        | 460     | 100% | 230       | 100% |
| Progression reported*             | 257     | 59%  | 108       | 47%  |
| Any additional treatment reported | 189     | 41%  | 78        | 34%  |
| Life-prolonging treatments**      |         |      |           |      |
| Docetaxel                         | 67      | 35%  | 8         | 10%  |
| Enzalutamide                      | 48      | 25%  | 16        | 21%  |
| Abiraterone                       | 41      | 22%  | 25        | 32%  |
| Cabazitaxel                       | 9       | 5%   | 12        | 15%  |
| Radium-223                        | 6       | 3%   | 4         | 5%   |
| Other chemotherapy***             | 6       | 3%   | 2         | 3%   |
| Other treatments**                |         |      |           |      |
| Anti-androgens                    | 155     | 82%  | 64        | 82%  |
| Dexamethasone                     | 38      | 20%  | 12        | 15%  |
| Prednisolone/prednisone           | 25      | 13%  | 7         | 9%   |
| Zoledronic acid                   | 18      | 10%  | 5         | 6%   |
| Stilboestrol                      | 15      | 8%   | 10        | 13%  |
| Other bisphosphonate****          | 5       | 3%   | 2         | 3%   |
| Strontium                         | 1       | <1%  | 0         | 0%   |

5

6 \*Any progression event, including biochemical progression

7 \*\*Percentages shown are calculated using the total numbers of patients randomised per trial arm. Note that patients  
8 reporting more than one type of additional treatment will be represented in more than once.

9 \*\*\* Other chemotherapy, excluding docetaxel and cabazitaxel, which are shown separately

10 \*\*\*\* Other bisphosphonate, excluding zoledronic acid, which is shown separately

11

12 **Table S2: Effect of docetaxel on M0 patients in terms of metastatic progression-free survival**  
 13 **(mPFS; primary outcome); failure-free survival (FFS); progression-free survival (PFS);**  
 14 **overall survival (OS); and prostate cancer-specific survival (PCSS).**

| Outcome | Hazard ratio<br>(95%CI) | 5-year event-free (95%CI) |             | RMST (months) |           |                       |
|---------|-------------------------|---------------------------|-------------|---------------|-----------|-----------------------|
|         |                         | Control                   | Docetaxel   | Control       | Docetaxel | Difference<br>(95%CI) |
| mPFS    | 0.89 (0.66 – 1.19)      | 77% (73-81)               | 82% (76-86) | 85.9          | 89.3      | 3.3 (-1.3 – 8.0)      |
| FFS     | 0.70 (0.56 – 0.88)      | 52% (47-56)               | 63% (56-69) | 63.3          | 74.2      | 10.9 (4.8 – 16.9)     |
| PFS     | 0.80 (0.61 – 1.06)      | 69% (66-74)               | 78% (70-82) | 80.9          | 86.7      | 5.8 (1.2 – 10.5)      |
| OS      | 0.88 (0.64 – 1.21)      | 81% (77-85)               | 87% (82-91) | 90.6          | 92.7      | 2.1 (-2.8 – 7.0)      |
| PCSS    | 0.84 (0.58 – 1.23)      | 86% (83-89)               | 91% (86-94) | 95.1          | 97.7      | 2.6 (-1.8 – 7.0)      |

15

16 Hazard ratio with 95%CI estimated from adjusted Cox model (except PCSS outcome, which was  
 17 modelled using a competing risks approach as described in the Methods); 5-year survival estimates  
 18 estimated from flexible parametric model.

19 **Table S3: Numbers of patients included in the exploratory sub-group analyses for effect of SOC**  
20 **radiotherapy, by nodal status\*.**

|                               | Control |      | Docetaxel |      |
|-------------------------------|---------|------|-----------|------|
| <b>All newly-diagnosed M0</b> |         |      |           |      |
| Not planned radiotherapy      | 136     | 39%  | 80        | 45%  |
| Planned radiotherapy          | 216     | 61%  | 96        | 55%  |
| Total                         | 352     | 100% | 176       | 100% |
| <b>N0 sub-group</b>           |         |      |           |      |
| Not planned radiotherapy      | 59      | 33%  | 28        | 31%  |
| Planned radiotherapy          | 122     | 67%  | 61        | 69%  |
| Total                         | 181     | 100% | 89        | 100% |
| <b>N+ sub-group</b>           |         |      |           |      |
| Not planned radiotherapy      | 77      | 45%  | 52        | 60%  |
| Planned radiotherapy          | 94      | 55%  | 35        | 40%  |
| Total                         | 171     | 100% | 87        | 100% |

21 \* This analysis only included newly-diagnosed M0 patients without any contraindication to radiotherapy, and for N0  
22 patients, only those who were recruited prior to 14-Nov-2011 (at which point SOC radiotherapy became mandated for N0  
23 patients according to the trial protocol).

24

25 **Table S4: Effect of SOC radiotherapy, by N0 or N+ nodal status. Results are shown for: (A)**  
 26 **metastatic progression-free survival (primary outcome); (B) failure-free survival; (C)**  
 27 **progression-free survival; (D) overall survival; and (E) prostate cancer-specific survival**

| Outcome                                     | Hazard ratio<br>(95%CI) | 5-year survival |     | RMST (months) |       |                       |
|---------------------------------------------|-------------------------|-----------------|-----|---------------|-------|-----------------------|
|                                             |                         | Control         | +RT | Control       | +RT   | Difference<br>(95%CI) |
| <b>Metastatic progression-free survival</b> |                         |                 |     |               |       |                       |
| N0 and N+                                   | 0.96 (0.69 – 1.31)      | 77%             | 78% | 86.5          | 86.7  | 0.2 (-6.2 – 6.6)      |
| N0 only                                     | 0.96 (0.54 – 1.71)      | 88%             | 86% | 96.2          | 95.2  | -1.0 (-8.1 – 6.2)     |
| N+ only                                     | 0.95 (0.64 – 1.41)      | 68%             | 69% | 76.3          | 77.7  | 1.3 (-9.5 – 12.1)     |
| <b>Failure-free survival</b>                |                         |                 |     |               |       |                       |
| N0 and N+                                   | 0.53 (0.42 – 0.70)      | 41%             | 63% | 54.6          | 73.6  | 19.0 (12.2 – 25.8)    |
| N0 only                                     | 0.38 (0.26 – 0.56)      | 41%             | 75% | 54.3          | 84.0  | 29.7 (19.0 – 40.3)    |
| N+ only                                     | 0.68 (0.49 – 0.94)      | 36%             | 51% | 50.0          | 62.1  | 12.1 (2.5 – 21.7)     |
| <b>Progression-free survival</b>            |                         |                 |     |               |       |                       |
| N0 and N+                                   | 0.76 (0.56 – 1.02)      | 66%             | 74% | 77.9          | 84.4  | 6.5 (0.3 – 12.8)      |
| N0 only                                     | 0.62 (0.37 – 1.02)      | 72%             | 84% | 84.0          | 93.5  | 9.5 (0.6 – 18.4)      |
| N+ only                                     | 0.84 (0.58 – 1.22)      | 57%             | 64% | 69.4          | 74.6  | 5.2 (-5.3 – 15.7)     |
| <b>Overall survival</b>                     |                         |                 |     |               |       |                       |
| N0 and N+                                   | 0.81 (0.58 – 1.13)      | 81%             | 82% | 89.0          | 91.2  | 2.2 (-2.4 – 6.8)      |
| N0 only                                     | 0.95 (0.53 – 1.71)      | 92%             | 87% | 98.4          | 95.7  | -2.6 (-8.5 – 3.2)     |
| N+ only                                     | 0.77 (0.51 – 1.18)      | 71%             | 78% | 80.5          | 85.9  | 5.4 (-2.8 – 13.5)     |
| <b>Prostate cancer-specific survival</b>    |                         |                 |     |               |       |                       |
| N0 and N+                                   | 0.78 (0.52 – 1.15)      | 86%             | 89% | 94.2          | 96.5  | 2.3 (-2.5 – 7.1)      |
| N0 only                                     | 0.72 (0.37 – 1.42)      | 93%             | 93% | 100.7         | 101.5 | 0.8 (-3.4 – 5.0)      |
| N+ only                                     | 0.81 (0.50 – 1.31)      | 79%             | 84% | 87.6          | 91.1  | 3.4 (-4.1 – 10.9)     |

28

29 Hazard ratio with 95%CI estimated from adjusted Cox model (except PCSS outcome, which was  
 30 modelled using a competing risks approach as described in the Methods); 5-year survival estimates  
 31 estimated from flexible parametric model.

32 **Table S5: Effect of SOC radiotherapy, with or without docetaxel treatment. Results are shown for:**  
 33 **(A) metastatic progression-free survival (primary outcome); (B) failure-free survival; (C)**  
 34 **progression-free survival; (D) overall survival; and (E) prostate cancer-specific survival.**

| Outcome                                     | Hazard ratio<br>(95%CI) | 5-year survival |     | RMST (months) |      |                       |
|---------------------------------------------|-------------------------|-----------------|-----|---------------|------|-----------------------|
|                                             |                         | Control         | +RT | Control       | +RT  | Difference<br>(95%CI) |
| <b>Metastatic progression-free survival</b> |                         |                 |     |               |      |                       |
| Both arms                                   | 0.96 (0.69 – 1.31)      | 77%             | 78% | 86.5          | 86.7 | 0.2 (-6.2 – 6.6)      |
| Without docetaxel                           | 0.81 (0.56 – 1.19)      | 74%             | 78% | 83.5          | 87.3 | 3.8 (-2.1 – 9.7)      |
| With docetaxel                              | 1.37 (0.74 – 2.54)      | 83%             | 78% | 91.3          | 85.1 | -6.2 (-16.5 – 4.1)    |
| <b>Failure-free survival</b>                |                         |                 |     |               |      |                       |
| Both arms                                   | 0.53 (0.42 – 0.70)      | 41%             | 63% | 54.6          | 73.6 | 19.0 (12.2 – 25.8)    |
| Without docetaxel                           | 0.48 (0.36 – 0.64)      | 36%             | 61% | 49.7          | 71.9 | 22.2 (13.9 – 30.5)    |
| With docetaxel                              | 0.73 (0.45 – 1.19)      | 54%             | 65% | 65.9          | 75.7 | 9.8 (-2.1 – 21.8)     |
| <b>Progression-free survival</b>            |                         |                 |     |               |      |                       |
| Both arms                                   | 0.76 (0.56 – 1.02)      | 66%             | 74% | 77.9          | 84.4 | 6.5 (0.3 – 12.8)      |
| Without docetaxel                           | 0.67 (0.48 – 0.95)      | 61%             | 73% | 74.4          | 84.2 | 9.8 (2.1 – 17.5)      |
| With docetaxel                              | 0.93 (0.52 – 1.66)      | 73%             | 77% | 84.5          | 85.1 | 0.6 (-8.6 – 9.8)      |
| <b>Overall survival</b>                     |                         |                 |     |               |      |                       |
| Both arms                                   | 0.81 (0.58 – 1.13)      | 81%             | 82% | 89.0          | 91.2 | 2.2 (-2.4 – 6.8)      |
| Without docetaxel                           | 0.69 (0.46 – 1.02)      | 78%             | 83% | 87.1          | 92.0 | 4.9 (-1.8 – 11.6)     |
| With docetaxel                              | 1.26 (0.69 – 2.33)      | 86%             | 81% | 92.7          | 88.6 | -4.2 (-12.7 – 4.4)    |
| <b>Prostate cancer-specific survival</b>    |                         |                 |     |               |      |                       |
| Both arms                                   | 0.78 (0.52 – 1.15)      | 86%             | 89% | 94.2          | 96.5 | 2.3 (-2.5 – 7.1)      |
| Without docetaxel                           | 0.68 (0.43 – 1.09)      | 83%             | 89% | 92.4          | 96.7 | 4.3 (-0.9 – 9.6)      |
| With docetaxel                              | 1.12 (0.54 – 2.32)      | 91%             | 86% | 97.7          | 95.6 | -2.1 (-10.3 – 6.1)    |

35

36 Hazard ratio with 95%CI estimated from adjusted Cox model (except PCSS outcome, which was  
 37 modelled using a competing risks approach as described in the Methods); 5-year survival estimates  
 38 estimated from flexible parametric model.

39  
40

**Table S6: Worst adverse event grade reported per patient within each CTCAE category for (i) up to one year on the trial; and (ii) after one year on the trial.**

| Worst AE grade                   | Up to one year* |            |           |            | After one year* |            |           |            |  |
|----------------------------------|-----------------|------------|-----------|------------|-----------------|------------|-----------|------------|--|
|                                  | Control         |            | Docetaxel |            | Control         |            | Docetaxel |            |  |
| <b>Hypersensitivity</b>          |                 |            |           |            |                 |            |           |            |  |
| <b>0</b>                         | 457             | 97%        | 193       | 91%        | 423             | 98%        | 197       | 98%        |  |
| <b>1</b>                         | 13              | 3%         | 15        | 7%         | 5               | 1%         | 4         | 2%         |  |
| <b>2</b>                         | 2               | <1%        | 2         | 1%         | 2               | <1%        | 1         | <1%        |  |
| <b>3</b>                         | 0               | 0%         | 1         | <1%        | 0               | 0%         | 0         | 0%         |  |
| <b>4</b>                         | 0               | 0%         | 1         | <1%        | 0               | 0%         | 0         | 0%         |  |
| <b>5</b>                         | 0               | 0%         | 0         | 0%         | 0               | 0%         | 0         | 0%         |  |
| <i>Missing</i>                   | 0               | <i>n/a</i> | 0         | <i>n/a</i> | 0               | <i>n/a</i> | 0         | <i>n/a</i> |  |
| <b>Blood/bone marrow</b>         |                 |            |           |            |                 |            |           |            |  |
| <b>0</b>                         | 388             | 83%        | 107       | 51%        | 276             | 64%        | 130       | 64%        |  |
| <b>1</b>                         | 76              | 16%        | 59        | 28%        | 139             | 32%        | 66        | 33%        |  |
| <b>2</b>                         | 3               | 1%         | 6         | 3%         | 6               | 1%         | 3         | 2%         |  |
| <b>3</b>                         | 3               | 1%         | 15        | 7%         | 4               | 1%         | 2         | 1%         |  |
| <b>4</b>                         | 0               | 0%         | 25        | 12%        | 5               | 1%         | 1         | <1%        |  |
| <b>5</b>                         | 0               | 0%         | 0         | 0%         | 0               | 0%         | 0         | 0%         |  |
| <i>Missing</i>                   | 2               | <i>n/a</i> | 0         | <i>n/a</i> | 0               | <i>n/a</i> | 0         | <i>n/a</i> |  |
| <b>Cardiovascular disorder</b>   |                 |            |           |            |                 |            |           |            |  |
| <b>0</b>                         | 425             | 90%        | 186       | 88%        | 343             | 80%        | 164       | 81%        |  |
| <b>1</b>                         | 32              | 7%         | 15        | 7%         | 41              | 10%        | 19        | 9%         |  |
| <b>2</b>                         | 13              | 3%         | 6         | 3%         | 26              | 6%         | 12        | 6%         |  |
| <b>3</b>                         | 1               | <1%        | 3         | 1%         | 17              | 4%         | 6         | 3%         |  |
| <b>4</b>                         | 1               | <1%        | 1         | <1%        | 2               | <1%        | 1         | 1%         |  |
| <b>5</b>                         | 0               | 0%         | 1         | <1%        | 1               | <1%        | 0         | 0%         |  |
| <i>Missing</i>                   | 0               | <i>n/a</i> | 0         | <i>n/a</i> | 0               | <i>n/a</i> | 0         | <i>n/a</i> |  |
| <b>Gastrointestinal disorder</b> |                 |            |           |            |                 |            |           |            |  |
| <b>0</b>                         | 229             | 49%        | 42        | 20%        | 194             | 45%        | 75        | 37%        |  |
| <b>1</b>                         | 185             | 39%        | 106       | 50%        | 164             | 38%        | 79        | 39%        |  |
| <b>2</b>                         | 51              | 11%        | 51        | 24%        | 53              | 12%        | 34        | 17%        |  |
| <b>3</b>                         | 6               | 1%         | 13        | 6%         | 17              | 4%         | 11        | 5%         |  |
| <b>4</b>                         | 1               | <1%        | 0         | 0%         | 2               | <1%        | 3         | 1%         |  |
| <b>5</b>                         | 0               | 0%         | 0         | 0%         | 0               | 0%         | 0         | 0%         |  |
| <i>Missing</i>                   | 0               | <i>n/a</i> | 0         | <i>n/a</i> | 0               | <i>n/a</i> | 0         | <i>n/a</i> |  |
| <b>Endocrine disorder</b>        |                 |            |           |            |                 |            |           |            |  |
| <b>0</b>                         | 69              | 15%        | 52        | 25%        | 67              | 16%        | 35        | 17%        |  |
| <b>1</b>                         | 231             | 49%        | 105       | 50%        | 202             | 47%        | 91        | 45%        |  |
| <b>2</b>                         | 141             | 30%        | 46        | 22%        | 116             | 27%        | 54        | 27%        |  |
| <b>3</b>                         | 31              | 7%         | 9         | 4%         | 45              | 10%        | 22        | 11%        |  |
| <b>4</b>                         | 0               | 0%         | 0         | 0%         | 0               | 0%         | 0         | 0%         |  |
| <b>5</b>                         | 0               | 0%         | 0         | 0%         | 0               | 0%         | 0         | 0%         |  |
| <i>Missing</i>                   | 0               | <i>n/a</i> | 0         | <i>n/a</i> | 0               | <i>n/a</i> | 0         | <i>n/a</i> |  |

| Worst AE grade                     | Up to one year* |     |           |     | After one year* |     |           |     |
|------------------------------------|-----------------|-----|-----------|-----|-----------------|-----|-----------|-----|
|                                    | Control         |     | Docetaxel |     | Control         |     | Docetaxel |     |
| <b>General disorder</b>            |                 |     |           |     |                 |     |           |     |
| 0                                  | 227             | 48% | 33        | 16% | 176             | 41% | 74        | 37% |
| 1                                  | 197             | 42% | 113       | 53% | 172             | 40% | 87        | 43% |
| 2                                  | 42              | 9%  | 52        | 25% | 60              | 14% | 35        | 17% |
| 3                                  | 6               | 1%  | 10        | 5%  | 18              | 4%  | 5         | 2%  |
| 4                                  | 0               | 0%  | 4         | 2%  | 4               | 1%  | 1         | 1%  |
| 5                                  | 0               | 0%  | 0         | 0%  | 0               | 0%  | 0         | 0%  |
| Missing                            | 0               | n/a | 0         | n/a | 0               | n/a | 0         | n/a |
| <b>Hepatic disorder</b>            |                 |     |           |     |                 |     |           |     |
| 0                                  | 431             | 92% | 186       | 88% | 371             | 86% | 175       | 87% |
| 1                                  | 33              | 7%  | 21        | 10% | 50              | 12% | 24        | 12% |
| 2                                  | 3               | 1%  | 5         | 2%  | 4               | 1%  | 2         | 1%  |
| 3                                  | 2               | 1%  | 0         | 0%  | 2               | <1% | 1         | 1%  |
| 4                                  | 1               | <1% | 0         | 0%  | 3               | 1%  | 0         | 0%  |
| 5                                  | 0               | 0%  | 0         | 0%  | 0               | 0%  | 0         | 0%  |
| Missing                            | 2               | n/a | 0         | n/a | 0               | n/a | 0         | n/a |
| <b>Lab abnormalities</b>           |                 |     |           |     |                 |     |           |     |
| 0                                  | 407             | 87% | 169       | 80% | 323             | 75% | 160       | 79% |
| 1                                  | 57              | 12% | 30        | 14% | 97              | 23% | 37        | 18% |
| 2                                  | 5               | 1%  | 7         | 3%  | 9               | 2%  | 3         | 1%  |
| 3                                  | 1               | <1% | 1         | <1% | 1               | <1% | 1         | 1%  |
| 4                                  | 0               | 0%  | 4         | 2%  | 0               | 0%  | 1         | 1%  |
| 5                                  | 0               | 0%  | 1         | <1% | 0               | 0%  | 0         | 0%  |
| Missing                            | 2               | n/a | 0         | n/a | 0               | n/a | 0         | n/a |
| <b>Metabolic &amp; nutritional</b> |                 |     |           |     |                 |     |           |     |
| 0                                  | 428             | 91% | 181       | 85% | 361             | 84% | 175       | 87% |
| 1                                  | 37              | 8%  | 27        | 13% | 52              | 12% | 26        | 13% |
| 2                                  | 7               | 1%  | 4         | 2%  | 13              | 3%  | 1         | 1%  |
| 3                                  | 0               | 0%  | 0         | 0%  | 4               | 1%  | 0         | 0%  |
| 4                                  | 0               | 0%  | 0         | 0%  | 0               | 0%  | 0         | 0%  |
| 5                                  | 0               | 0%  | 0         | 0%  | 0               | 0%  | 0         | 0%  |
| Missing                            | 0               | n/a | 0         | n/a | 0               | n/a | 0         | n/a |
| <b>Musculoskeletal</b>             |                 |     |           |     |                 |     |           |     |
| 0                                  | 242             | 51% | 78        | 37% | 191             | 44% | 68        | 34% |
| 1                                  | 177             | 38% | 109       | 51% | 152             | 35% | 86        | 43% |
| 2                                  | 46              | 10% | 22        | 10% | 72              | 17% | 44        | 22% |
| 3                                  | 7               | 1%  | 3         | 1%  | 14              | 3%  | 3         | 1%  |
| 4                                  | 0               | 0%  | 0         | 0%  | 1               | <1% | 1         | 1%  |
| 5                                  | 0               | 0%  | 0         | 0%  | 0               | 0%  | 0         | 0%  |
| Missing                            | 0               | n/a | 0         | n/a | 0               | n/a | 0         | n/a |
| <b>Nervous system</b>              |                 |     |           |     |                 |     |           |     |
| 0                                  | 370             | 78% | 114       | 54% | 324             | 75% | 118       | 58% |
| 1                                  | 86              | 18% | 69        | 33% | 82              | 19% | 63        | 31% |
| 2                                  | 11              | 2%  | 23        | 11% | 19              | 4%  | 12        | 6%  |
| 3                                  | 5               | 1%  | 4         | 2%  | 5               | 1%  | 7         | 3%  |
| 4                                  | 0               | 0%  | 1         | <1% | 0               | 0%  | 2         | 1%  |
| 5                                  | 0               | 0%  | 1         | <1% | 0               | 0%  | 0         | 0%  |
| Missing                            | 0               | n/a | 0         | n/a | 0               | n/a | 0         | n/a |



| Worst AE grade              | Up to one year* |             |            |             | After one year* |             |            |             |
|-----------------------------|-----------------|-------------|------------|-------------|-----------------|-------------|------------|-------------|
|                             | Control         |             | Docetaxel  |             | Control         |             | Docetaxel  |             |
| <b>Ocular disorder</b>      |                 |             |            |             |                 |             |            |             |
| 0                           | 443             | 94%         | 174        | 82%         | 377             | 88%         | 179        | 89%         |
| 1                           | 25              | 5%          | 31         | 15%         | 43              | 10%         | 16         | 8%          |
| 2                           | 2               | <1%         | 5          | 2%          | 7               | 2%          | 6          | 3%          |
| 3                           | 2               | <1%         | 2          | 1%          | 3               | 1%          | 1          | 1%          |
| 4                           | 0               | 0%          | 0          | 0%          | 0               | 0%          | 0          | 0%          |
| 5                           | 0               | 0%          | 0          | 0%          | 0               | 0%          | 0          | 0%          |
| Missing                     | 0               | n/a         | 0          | n/a         | 0               | n/a         | 0          | n/a         |
| <b>Psychiatric disorder</b> |                 |             |            |             |                 |             |            |             |
| 0                           | 323             | 68%         | 139        | 66%         | 303             | 70%         | 133        | 66%         |
| 1                           | 113             | 24%         | 57         | 27%         | 98              | 23%         | 46         | 23%         |
| 2                           | 32              | 7%          | 8          | 4%          | 23              | 5%          | 20         | 10%         |
| 3                           | 4               | 1%          | 6          | 3%          | 6               | 1%          | 3          | 1%          |
| 4                           | 0               | 0%          | 2          | 1%          | 0               | 0%          | 0          | 0%          |
| 5                           | 0               | 0%          | 0          | 0%          | 0               | 0%          | 0          | 0%          |
| Missing                     | 0               | n/a         | 0          | n/a         | 0               | n/a         | 0          | n/a         |
| <b>Renal disorder</b>       |                 |             |            |             |                 |             |            |             |
| 0                           | 182             | 39%         | 104        | 49%         | 129             | 30%         | 64         | 32%         |
| 1                           | 190             | 40%         | 76         | 36%         | 184             | 43%         | 88         | 44%         |
| 2                           | 90              | 19%         | 32         | 15%         | 97              | 23%         | 44         | 23%         |
| 3                           | 8               | 2%          | 0          | 0%          | 19              | 4%          | 6          | 3%          |
| 4                           | 1               | <1%         | 0          | 0%          | 1               | <1%         | 0          | 0%          |
| 5                           | 1               | <1%         | 0          | 0%          | 0               | 0%          | 0          | 0%          |
| Missing                     | 0               | n/a         | 0          | n/a         | 0               | n/a         | 0          | n/a         |
| <b>Respiratory disorder</b> |                 |             |            |             |                 |             |            |             |
| 0                           | 361             | 76%         | 121        | 57%         | 292             | 68%         | 126        | 62%         |
| 1                           | 61              | 13%         | 45         | 21%         | 74              | 17%         | 39         | 19%         |
| 2                           | 45              | 10%         | 40         | 19%         | 53              | 12%         | 33         | 16%         |
| 3                           | 5               | 1%          | 5          | 2%          | 9               | 2%          | 2          | 1%          |
| 4                           | 0               | 0%          | 1          | <1%         | 2               | <1%         | 2          | 1%          |
| 5                           | 0               | 0%          | 0          | 0%          | 0               | 0%          | 0          | 0%          |
| Missing                     | 0               | n/a         | 0          | n/a         | 0               | n/a         | 0          | n/a         |
| <b>Skin disorder</b>        |                 |             |            |             |                 |             |            |             |
| 0                           | 376             | 80%         | 60         | 28%         | 353             | 82%         | 154        | 76%         |
| 1                           | 83              | 18%         | 107        | 50%         | 58              | 13%         | 42         | 21%         |
| 2                           | 8               | 2%          | 42         | 20%         | 12              | 3%          | 5          | 2%          |
| 3                           | 4               | 1%          | 3          | 1%          | 7               | 2%          | 1          | 1%          |
| 4                           | 1               | <1%         | 0          | 0%          | 0               | 0%          | 0          | 0%          |
| 5                           | 0               | 0%          | 0          | 0%          | 0               | 0%          | 0          | 0%          |
| Missing                     | 0               | n/a         | 0          | n/a         | 0               | n/a         | 0          | n/a         |
| <b>Total**</b>              | <b>472</b>      | <b>100%</b> | <b>212</b> | <b>100%</b> | <b>430</b>      | <b>100%</b> | <b>202</b> | <b>100%</b> |

41 \*Timed from randomisation

42 \*\* Total numbers shown for safety population, where 18 patients allocated to the docetaxel group never started docetaxel  
43 treatment and are therefore included in the SOC group for safety reporting. Total numbers also take into consideration  
44 numbers of patients described in Table 2 for whom AE data was not collected (i.e. those who did not report AE data after  
45 having died or withdrawn from the trial in the first year from randomisation, or those who did not report AEs after disease  
46 progression, as specified in the trial protocol.

47

48 **Figure S1: Effect of docetaxel on metastatic progression-free survival across exploratory sub-**  
49 **groups according to baseline factors**

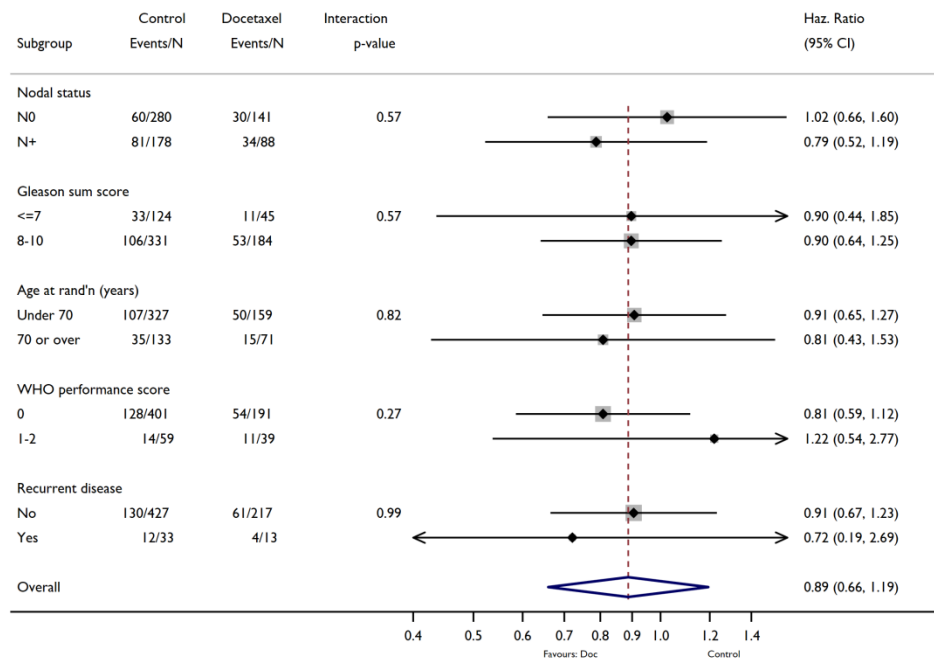

50

51 Note: 2 events across 3 patients with unreported nodal status and 4 events across 6 patients with  
52 unreported Gleason score are excluded from the relevant sections of the figure.

53

54 **Figure S2: Effect of docetaxel on M0 patients in terms of metastatic progression-free survival**  
 55 **(mPFS; primary outcome); failure-free survival (FFS); progression-free survival (PFS);**  
 56 **overall survival (OS); and prostate cancer-specific survival (PCSS)**

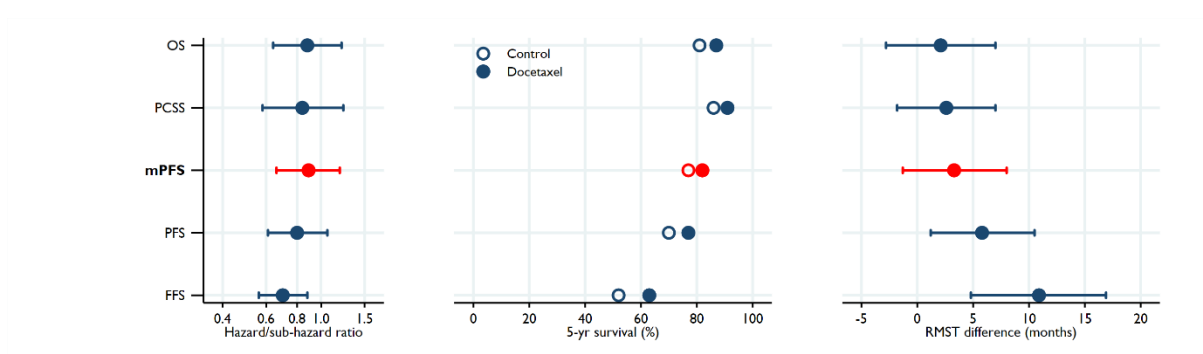

57

58 **Left:** hazard/sub-hazard ratio with 95%CI.

59 **Centre:** 5-year survival estimates, by arm.

60 **Right:** difference (RMST estimate) between arms in survival time, where a positive difference  
 61 indicates longer survival time for the docetaxel arm.

62 **Red:** primary outcome measure for this analysis

63 **Blue:** other outcome measures

64 **Figure S3: Effect of SOC radiotherapy, by N0 or N+ nodal status. Results are shown for: (A)**  
 65 **metastatic progression-free survival (primary outcome); (B) failure-free survival; (C)**  
 66 **progression-free survival; (D) overall survival; and (E) prostate cancer-specific survival**

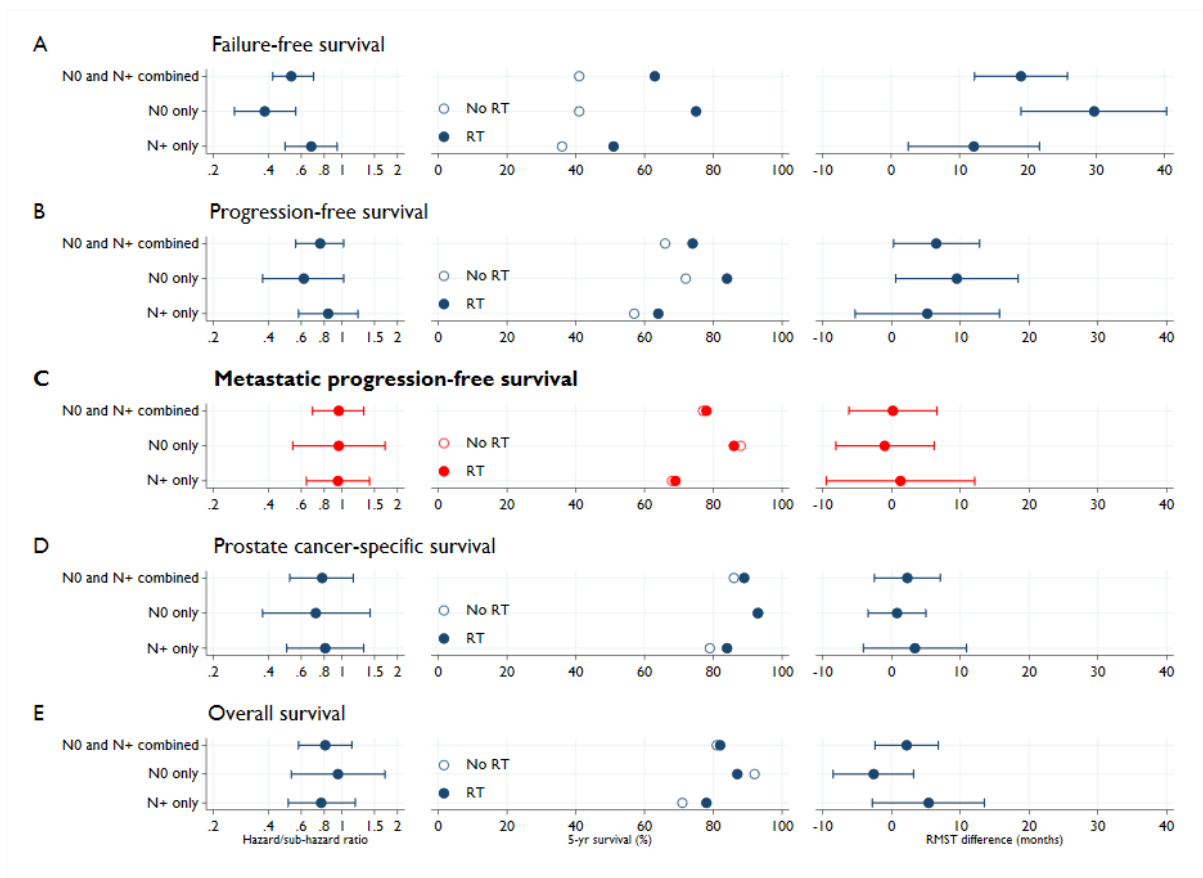

67 **Left:** hazard/sub-hazard ratio with 95%CI.  
 68 **Centre:** 5-year survival estimates, by arm.  
 69 **Right:** difference (RMST estimate) between SOC radiotherapy groups in survival time, where a  
 70 positive difference indicates longer survival time for the sub-group planned for radiotherapy.  
 71

72 **Figure S4: Forest plot of combined analysis with other eligible trials**

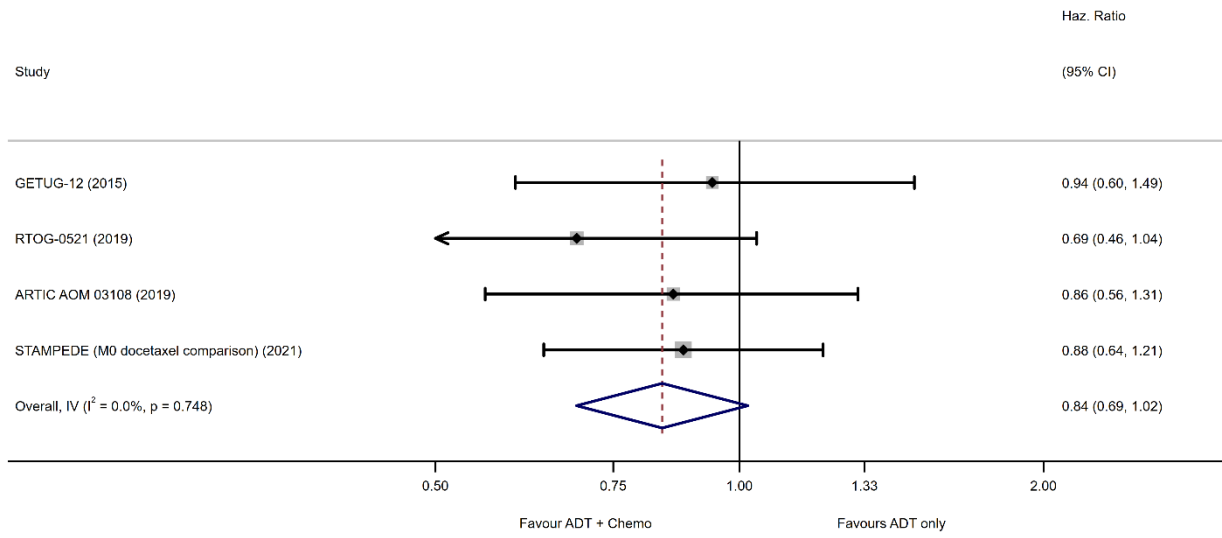

73

# STAMPEDE OVERSIGHT COMMITTEES, STAFF AND COLLABORATORS

Version: 15-Sep-2021

## CONTENTS

|                                                             |     |
|-------------------------------------------------------------|-----|
| NOTES .....                                                 | 2   |
| TRIAL MANAGEMENT GROUP .....                                | 3   |
| INDEPENDENT DATA MONITORING COMMITTEE .....                 | 4   |
| TRIAL STEERING COMMITTEE .....                              | 5   |
| MRC CLINICAL TRIALS UNIT AT UCL STAFF .....                 | 6   |
| SWISS GROUP FOR CANCER CLINICAL RESEARCH (SAKK) STAFF ..... | 10  |
| BIOLOGY AND IMAGING SUBGROUPS .....                         | 11  |
| INVESTIGATORS AND COLLABORATORS: SITE STAFF .....           | 12  |
| INDUSTRY COLLABORATORS .....                                | 151 |
| PARTICIPANTS .....                                          | 152 |

## NOTES

Investigators and site staff are those who have formally appeared at any time on a site's Delegation Logs.

CTU staff are those who have worked on or contributed to the trial any time from the outset until the date of this report.

The independent members of the Independent Data Monitoring Committee and Trial Oversight Committee play an important role in the conduct of the trial.

Industry collaborators are a subset of the people who have worked, on relevant sections, with the trial staff to ensure the trial runs efficiently.

## TRIAL MANAGEMENT GROUP

(Listing only member external to the trials unit or senior staff at the trials unit)

| Area              | Status   | Member               | Geography                        | Role                        |
|-------------------|----------|----------------------|----------------------------------|-----------------------------|
| Clinical/Surgical | Current  | Gerhardt Attard      | London (UCL), UK                 | CCI                         |
| ~                 | ~        | Simon Chowdhury      | London (Guys), UK                |                             |
| ~                 | ~        | Noel Clarke          | Manchester, UK                   | Deputy CI, Co-CCI           |
| ~                 | ~        | William Cross        | Leeds, UK                        |                             |
| ~                 | ~        | David Dearnaley      | Sutton, UK                       |                             |
| ~                 | ~        | Silke Gillessen      | Lugano, Switzerland <sup>1</sup> | CCI                         |
| ~                 | ~        | Nicholas James       | London (ICR), UK <sup>2</sup>    | CI                          |
| ~                 | ~        | Rob Jones            | Glasgow, UK                      |                             |
| ~                 | ~        | Zafar Malik          | Wirral, UK                       |                             |
| ~                 | ~        | Chris Parker         | Sutton, UK                       | CCI                         |
| ~                 | ~        | J Martin Russell     | Glasgow, BOC                     |                             |
| ~                 | Previous | Daniel Aebersold     | Berne, Switzerland               |                             |
| ~                 | ~        | John Anderson        | Sheffield, UK                    |                             |
| ~                 | ~        | Johann de Bono       | Sutton, UK                       |                             |
| ~                 | ~        | Malcolm Mason        | Cardiff, UK                      |                             |
| ~                 | ~        | John Masters         | London, UK                       |                             |
| ~                 | ~        | Rick Popert          | London (Guys), UK                |                             |
| ~                 | ~        | Alastair Ritchie     | Gloucester, UK                   |                             |
| ~                 | ~        | George Thalmann      | Berne, Switzerland               |                             |
| PPI               | Current  | David Matheson       | Other                            |                             |
| ~                 | ~        | Robin Millman        | ~                                |                             |
| ~                 | Previous | John Dwyer           | ~                                |                             |
| ~                 | ~        | David Hoe-Richardson | ~                                |                             |
| ~                 | ~        | Jim Stansfeld        | ~                                |                             |
| Senior CTU        | Current  | Claire Amos          | MRC CTU at UCL                   |                             |
| ~                 | ~        | Nafisah Atako        | ~                                |                             |
| ~                 | ~        | Louise Brown         | ~                                |                             |
| ~                 | ~        | Adrian Cook          | ~                                |                             |
| ~                 | ~        | Duncan Gilbert       | ~                                |                             |
| ~                 | ~        | Ruth Langley         | ~                                | CCI                         |
| ~                 | ~        | Mahesh Parmar        | ~                                | Programme Lead <sup>3</sup> |
| ~                 | ~        | Matthew Sydes        | ~                                |                             |
| ~                 | Previous | Cheryl Pugh          | ~                                |                             |
| Clinical Fellow   | Current  | Hoda Abdely-Aty      | ~                                |                             |
| ~                 | Previous | Clare Gilson         | ~                                |                             |
| ~                 | ~        | Archie MacNair       | ~                                |                             |
| ~                 | ~        | Hannah Rush          | ~                                |                             |

**Key:** CI = Chief Investigator  
CCI = Comparison CI  
CoCCI = Comparison Co-CI

**Note:** The full list of MRC CTU at UCL staff is detailed below in a subsequent section.

<sup>1</sup> Previously Manchester, UK & St Gallen, Switzerland

<sup>2</sup> Previously Birmingham, UK & Warwick, UK

<sup>3</sup> Also CTU Director



## INDEPENDENT DATA MONITORING COMMITTEE

(All members independent)

| Member          | Status   | Role    |
|-----------------|----------|---------|
| Richard Emsley  | Current  |         |
| Bertrand Tombal | ~        | Chair 3 |
| Ronald de Wit   | ~        |         |
| Chris Williams  | Previous | Chair 1 |
| John Yarnold    | ~        | Chair 2 |
| Doug Altman     | ~        |         |
| Reg Hall        | ~        |         |

**TRIAL STEERING COMMITTEE**  
(Listing only independent members)

| <b>Member</b>      | <b>Status</b> | <b>Role</b> |
|--------------------|---------------|-------------|
| Paula Ghaneh       | Current       | Chair 3     |
| Tim Clayton        | ~             |             |
| Jan-Erik Dember    | ~             |             |
| Jonathan Ledermann | Previous      | Chair 1     |
| James Larkin       | ~             | Chair 2     |
| Richard Emsley     | ~             |             |
| John Fitzpatrick   | ~             |             |
| Alan Horwich       | ~             |             |
| David Kirk         | ~             |             |
| Jim Paul           | ~             |             |

## MRC CLINICAL TRIALS UNIT AT UCL STAFF

| Area          | Status                       | Name                        |             |
|---------------|------------------------------|-----------------------------|-------------|
| Statisticians | Current                      | Christopher Brawley         |             |
|               | ~                            | Louise Brown                |             |
|               | ~                            | Adrian Cook                 |             |
|               | ~                            | Laura Murphy                |             |
|               | ~                            | Matthew Nankivell           |             |
|               | ~                            | Mahesh Parmar               |             |
|               | ~                            | Matthew Sydes               |             |
|               | Previous                     | Sophie Barthel              |             |
|               | ~                            | Daniel Bratton              |             |
|               | ~                            | Babak Choodari-Oskooei      |             |
|               | ~                            | Trinh Duong                 |             |
|               | ~                            | Andrew Embleton             |             |
|               | ~                            | Melissa Gannon (nee Spears) |             |
|               | ~                            | Fiona Ingleby               |             |
|               | ~                            | Elizabeth James             |             |
|               | ~                            | Rachel Jinks (nee Morgan)   |             |
|               | ~                            | Gordana Jovic               |             |
|               | ~                            | Patrick Royston             |             |
|               | Project and Trial Management | Current                     | Claire Amos |
|               |                              | ~                           | Mazna Anjum |
| ~             |                              | Nafisah Atako               |             |
| ~             |                              | Michelle Buckner            |             |
| ~             |                              | Sofeya Ishqa                |             |
| ~             |                              | Claire Murphy               |             |
| ~             |                              | Malissa Richmond            |             |
| Previous      |                              | Shabinah Ali                |             |
| ~             |                              | Alanna Brown                |             |
| ~             |                              | Joanna Calvert              |             |
| ~             |                              | Charlene Carvalho           |             |
| ~             |                              | Tom Fairfield               |             |
| ~             |                              | Silvia Forcat               |             |
| ~             |                              | Michelle Gabriel            |             |
| ~             |                              | Charlene Green              |             |
| ~             |                              | Anna Herasimtschuk          |             |
| ~             |                              | Caroline Hogan              |             |
| ~             |                              | Sarah Jackson               |             |
| ~             |                              | Neil Kelk                   |             |
| ~             |                              | James Latham                |             |
| ~             |                              | Dymphna Lee                 |             |
| ~             |                              | Sarah Miller                |             |
| ~             |                              | Sharon Naylor               |             |
| ~             |                              | Dipa Noor                   |             |
| ~             |                              | Jacqui Nuttall              |             |
| ~             |                              | Jenny Petrie                |             |
| ~             |                              | Orla Prendiville            |             |
| ~             |                              | Cheryl Pugh                 |             |
| ~             |                              | Karen Sanders               |             |
| ~             |                              | Francesca Schiavone         |             |
| ~             | Aminata Sy                   |                             |             |
| ~             | Charlotte Tyson              |                             |             |
| ~             | Hannah Vaughan               |                             |             |

## MRC CLINICAL TRIALS UNIT AT UCL STAFF

| Area                            | Status   | Name                 |
|---------------------------------|----------|----------------------|
| ~                               | ~        | Christopher Wanstall |
| ~                               | ~        | Katie Ward           |
| ~                               | ~        | Melanie Weiss        |
| ~                               | ~        | Arlen Wilcox         |
| Clinicians                      | Current  | Hoda Abdel-Aty       |
| ~                               | ~        | Duncan Gilbert       |
| ~                               | ~        | Ruth Langley         |
| ~                               | Previous | Clare Gilson         |
| ~                               | ~        | Archie Macnair       |
| ~                               | ~        | Sarah Meredith       |
| ~                               | ~        | Alastair Ritchie     |
| ~                               | ~        | Hannah Rush          |
| Data Scientists and Programmers | Current  | Carlos Diaz-Montana  |
| ~                               | ~        | Lindsey Masters      |
| ~                               | ~        | Nadine Vanlooy       |
| ~                               | Previous | Carly Au             |
| ~                               | ~        | Will Cragg           |
| ~                               | ~        | Carlos Diaz Montana  |
| ~                               | ~        | Dominic Hague        |
| ~                               | ~        | Zaheer Islam         |
| ~                               | ~        | Sajad Khan           |
| ~                               | ~        | Dominic Mounsey      |
| ~                               | ~        | Mary Rauchenberger   |
| ~                               | ~        | Nancy Tappenden      |
| ~                               | ~        | Stephen Townsend     |
| ~                               | ~        | Nadine Van-Looy      |
| Data Management                 | Current  | Ify Ejizu-Allen      |
| ~                               | ~        | Margaret Hook        |
| ~                               | ~        | William Hudson       |
| ~                               | ~        | Tasheeka Jeyapalan   |
| ~                               | ~        | Alexander Lawton     |
| ~                               | ~        | Meghna Pandya        |
| ~                               | ~        | Nazia Parkar         |
| ~                               | Previous | Eva Ades             |
| ~                               | ~        | Carly Au             |
| ~                               | ~        | Katherine Beaney     |
| ~                               | ~        | Nargis Begum         |
| ~                               | ~        | Katharine Bellenger  |
| ~                               | ~        | Lina Bergstrom       |
| ~                               | ~        | Veronica Birzu       |
| ~                               | ~        | Elizabeth Clark      |
| ~                               | ~        | Emma Donoghue        |
| ~                               | ~        | Amy Fiddament        |
| ~                               | ~        | Shree Gajjar         |
| ~                               | ~        | Hannah Gardner       |
| ~                               | ~        | Jenna Grabey         |
| ~                               | ~        | Richard Gracie       |
| ~                               | ~        | Charlene Green       |
| ~                               | ~        | Adam Gregory         |

**MRC CLINICAL TRIALS UNIT AT UCL STAFF**

| Area             | Status   | Name                  |
|------------------|----------|-----------------------|
| ~                | ~        | Dominic Hague         |
| ~                | ~        | Shama Hassan          |
| ~                | ~        | Jordan Hedges         |
| ~                | ~        | Robyn Henry-Cockles   |
| ~                | ~        | Sofeya Ishaq          |
| ~                | ~        | Danielle Johnson      |
| ~                | ~        | Saba Khan             |
| ~                | ~        | Zohrah Khan           |
| ~                | ~        | Adele Mabley          |
| ~                | ~        | Georgia Mannion-Krase |
| ~                | ~        | Jacque Millett        |
| ~                | ~        | Brendan Murphy        |
| ~                | ~        | Myfanwy Nicholas      |
| ~                | ~        | Sara Peres            |
| ~                | ~        | Tasmin Philips        |
| ~                | ~        | Philip Pollock        |
| ~                | ~        | Tim Smith             |
| ~                | ~        | Hannah Sweeney        |
| ~                | ~        | Laura Van Dyck        |
| ~                | ~        | Hannah Vaughan        |
| ~                | ~        | Peter Vaughan         |
| ~                | ~        | Steph Wetton          |
| ~                | ~        | Andrew Whitney        |
| Other Operations | Current  | Fleur Hudson          |
| ~                | ~        | Nicola Joffe          |
| ~                | ~        | Macey Murray          |
| ~                | Previous | Michelle Gabriel      |
| Trial Assistants | Current  | Elizabeth Adesanya    |
| ~                | ~        | Yumna Ali             |
| ~                | ~        | Atma Amin             |
| ~                | ~        | Hannah Babiker        |
| ~                | ~        | Bryony Bathie         |
| ~                | ~        | Helen Chapman         |
| ~                | ~        | Georgia Cowley        |
| ~                | ~        | Leigh Dobson          |
| ~                | ~        | James Dunn            |
| ~                | ~        | Robbie Dunn           |
| ~                | ~        | Amy Fiddament         |
| ~                | ~        | Tracey Fisher         |
| ~                | ~        | Tracy Fisher          |
| ~                | ~        | Ben Forson            |
| ~                | ~        | Adam Gregory          |
| ~                | ~        | Nasir Jamil           |
| ~                | ~        | Tasheeka Jeyapalan    |
| ~                | ~        | Harry Kitson          |
| ~                | ~        | Rebecca Lo            |
| ~                | ~        | Joseph Martin         |
| ~                | ~        | Nour Merzouki         |
| ~                | ~        | Lynda Micklewright    |
| ~                | ~        | Ray Phillips          |

## MRC CLINICAL TRIALS UNIT AT UCL STAFF

| Area                       | Status  | Name             |
|----------------------------|---------|------------------|
| ~                          | ~       | Jamie Simmons    |
| ~                          | ~       | Shanaz Sohail    |
| ~                          | ~       | Jeevan Sohal     |
| ~                          | ~       | Nat Thorogood    |
| ~                          | ~       | Stephanie Tsenti |
| ~                          | ~       | Alexandra Wadia  |
| ~                          | ~       | Stephanie Wetton |
| STOPCAP Meta-Analysis team | Current | Sarah Burdett    |
|                            | ~       | David Fisher     |
|                            | ~       | Peter Godolphin  |
|                            | ~       | Larysa Rydzewska |
|                            | ~       | Jayne Tierney    |
|                            | ~       | Claire Vale      |

## SWISS GROUP FOR CANCER CLINICAL RESEARCH (SAKK) STAFF

| Area            | Status | Name                                               |
|-----------------|--------|----------------------------------------------------|
| SAKK operations |        | Estelle Cassolly<br>Eloïse Kremer<br>Corinne Schar |

**BIOLOGY AND IMAGING SUBGROUPS**

(Members of translational subgroups or work packages; TMG members not repeated here)

| Person                          | Status  | Geography                           |
|---------------------------------|---------|-------------------------------------|
| Adnan Ali                       | Current | Manchester, UK                      |
| Radhi Anand                     | ~       | London (UCL), UK                    |
| Dan Berney                      | ~       | London (Barts), UK                  |
| Hassan Douis                    | ~       | Birmingham, UK                      |
| Ros Eeles                       | ~       | London (ICR), UK                    |
| Stephenie Friedrich             | ~       | London (UCL), UK                    |
| Emily Grist                     | ~       | London (UCL), UK                    |
| Anis A Hamid                    | ~       | Melbourne, Aus & Boston (DFCI), USA |
| Aine Haran                      | ~       | Manchester, UK                      |
| A M Mahedi Hassan               | ~       | London (UCL), UK                    |
| Alex Hoyle                      | ~       | Manchester, UK                      |
| Sakunthala Kudahetti            | ~       | London (Barts), UK                  |
| Sharanpreet Lall                | ~       | London (UCL), UK                    |
| Gianmarco Leone                 | ~       | London (UCL), UK                    |
| Hing Leung                      | ~       | Glasgow, BOC                        |
| Stefano Lise                    | ~       | London (UCL), UK                    |
| Larissa Mendes                  | ~       | London (UCL), UK                    |
| Karolina Nowakowska-Pawelkowicz | ~       | London (UCL), UK                    |
| Charles Parker                  | ~       | London (UCL), UK                    |
| Marina Parry                    | ~       | London (UCL), UK                    |
| Alison Parry-Jones              | ~       | Cardiff, UK                         |
| Chris Sweeney                   | ~       | Boston (DFCI), USA                  |
| Suparna Thakali                 | ~       | London (UCL), UK                    |
| Nina Tinariu                    | ~       | London (ICR), UK                    |
| Maria Vico                      | ~       | London (UCL), UK                    |
| Sara Santos Vidal               | ~       | London (Barts), UK                  |
| Daniel Wetterskog               | ~       | London (UCL), UK                    |
| Anna Wingate                    | ~       | London (UCL), UK                    |
| Carla Bautista                  | Past    | London (UCL), UK                    |
| Paolo Cremaschi                 | ~       | London (UCL), UK                    |
| Thomas Hambrook                 | ~       | Manchester, UK                      |
| Alex Landless                   | ~       | London (UCL), UK                    |
| Nik Matthews                    | ~       | London (ICR), UK                    |
| Mariana Buongiorno Pereira      | ~       | London (UCL), UK                    |
| Kamila Sychowska                | ~       | London (UCL), UK                    |
| David Waugh                     | ~       | Belfast, UK                         |
| Leila Zakka                     | ~       | London (UCL), UK                    |



## INVESTIGATORS AND COLLABORATORS: SITE STAFF

Staff on site delegation logs

| City            | Care_Site                  | Person_Name                   | Site_PI |
|-----------------|----------------------------|-------------------------------|---------|
| Abergavenny, UK | Nevill Hall Hospital       | Christian Smith               |         |
| Aberystwyth, UK | Bronglais General Hospital | Elin Jones                    | PI      |
| ~               | ~                          | Russel Canavan                |         |
| ~               | ~                          | Kirsty Marie Dennett          |         |
| ~               | ~                          | Claire Duggan                 |         |
| ~               | ~                          | Sajid Durrani                 |         |
| ~               | ~                          | Bleddyn Edwards               |         |
| ~               | ~                          | John Edwards                  |         |
| ~               | ~                          | Sandra Evens                  |         |
| ~               | ~                          | Abigail Hynes                 |         |
| ~               | ~                          | Basharat Jameel               |         |
| ~               | ~                          | Gwenan Parry Jones            |         |
| ~               | ~                          | Philip Jones                  |         |
| ~               | ~                          | Rhian Elin Jones              |         |
| ~               | ~                          | Sarah Jones                   |         |
| ~               | ~                          | Christine Kotonya             |         |
| ~               | ~                          | Ronda Loosley                 |         |
| ~               | ~                          | Heather McGuinness            |         |
| ~               | ~                          | Cerith Morgan                 |         |
| ~               | ~                          | Geraint Morgan                |         |
| ~               | ~                          | Mark Narain                   |         |
| ~               | ~                          | Emma Nurse                    |         |
| ~               | ~                          | Donna Robson                  |         |
| ~               | ~                          | Llinos Strange                |         |
| ~               | ~                          | Helen Tench                   |         |
| ~               | ~                          | Sean Thomas                   |         |
| ~               | ~                          | Toby Frederick Trugeion-Smith |         |
| ~               | ~                          | Kenneth Richard Williams      |         |
| ~               | ~                          | Rebecca Wolf-Roberts          |         |
| Ashford, UK     | William Harvey Hospital    | Carys Thomas                  | PI      |
| ~               | ~                          | Albert Edwards                | Co-I    |
| ~               | ~                          | Jessica Little                | Co-I    |
| ~               | ~                          | Natasha Mithal                | Co-I    |

## INVESTIGATORS AND COLLABORATORS: SITE STAFF

Staff on site delegation logs

| City | Care_Site | Person_Name       | Site_PI |
|------|-----------|-------------------|---------|
| ~    | ~         | Rakesh Raman      | Co-I    |
| ~    | ~         | Jennifer Turner   | Co-I    |
| ~    | ~         | Louise Allen      |         |
| ~    | ~         | Bonny Appleby     |         |
| ~    | ~         | Sharon Beesley    |         |
| ~    | ~         | Hayley Blackgrove |         |
| ~    | ~         | Tracy Boakes      |         |
| ~    | ~         | Patryk Brulinski  |         |
| ~    | ~         | Julie Buckley     |         |
| ~    | ~         | Miguel Capo-Mir   |         |
| ~    | ~         | Natalie Catt      |         |
| ~    | ~         | Mathilda Cominos  |         |
| ~    | ~         | Denise Crawford   |         |
| ~    | ~         | Nikki Crisp       |         |
| ~    | ~         | Steve Dann        |         |
| ~    | ~         | Julie-Ann Davies  |         |
| ~    | ~         | Susan Drakeley    |         |
| ~    | ~         | Clary Evans       |         |
| ~    | ~         | Sam Gibson        |         |
| ~    | ~         | Andrew Gillian    |         |
| ~    | ~         | Louise Gladwell   |         |
| ~    | ~         | Coral Greenstreet |         |
| ~    | ~         | Tessa Hammond     |         |
| ~    | ~         | Sandra Holness    |         |
| ~    | ~         | Laura Kehoe       |         |
| ~    | ~         | Sue Kelly         |         |
| ~    | ~         | Rachel Larkins    |         |
| ~    | ~         | Kathryn Lees      |         |
| ~    | ~         | Sarah Lightfoot   |         |
| ~    | ~         | Sarah Lines       |         |
| ~    | ~         | Margaret Lipsham  |         |
| ~    | ~         | Sydney Loveland   |         |
| ~    | ~         | Rohit Malde       |         |

## INVESTIGATORS AND COLLABORATORS: SITE STAFF

Staff on site delegation logs

| City          | Care_Site                 | Person_Name            | Site_PI |
|---------------|---------------------------|------------------------|---------|
| ~             | ~                         | Kim Mears              |         |
| ~             | ~                         | Sharon Middleton       |         |
| ~             | ~                         | Arafat Mirza           |         |
| ~             | ~                         | Kannon Nathan          |         |
| ~             | ~                         | Udaiveer Panwar        |         |
| ~             | ~                         | Claire Pelham          |         |
| ~             | ~                         | Karen Robinson         |         |
| ~             | ~                         | Susan Rogers           |         |
| ~             | ~                         | Lesley Rose            |         |
| ~             | ~                         | Cindy Slater           |         |
| ~             | ~                         | Mathini Sridharan      |         |
| ~             | ~                         | Stephane Tankoua       |         |
| ~             | ~                         | Katy Taylor            |         |
| ~             | ~                         | Kim Travis             |         |
| ~             | ~                         | Alba Tubau             |         |
| ~             | ~                         | Ifigenia Vasiliadou    |         |
| ~             | ~                         | Kathleen (Kathy) Walsh |         |
| ~             | ~                         | Paula Whichelo         |         |
| ~             | ~                         | Claire White           |         |
| ~             | ~                         | Joanne Williams        |         |
| ~             | ~                         | Elizabeth Williamson   |         |
| ~             | ~                         | Victoria Williamson    |         |
| ~             | ~                         | Marian Wood            |         |
| ~             | ~                         | Linda Wray             |         |
| ~             | ~                         | Hilary Zurakovsky      |         |
| Aylesbury, UK | Stoke Mandeville Hospital | Katherine Hyde         | PI      |
| ~             | ~                         | Philip Camilleri       | Co-I    |
| ~             | ~                         | Thinn Pwint            | Co-I    |
| ~             | ~                         | Christopher Alcock     |         |
| ~             | ~                         | Maggie Aldersley       |         |
| ~             | ~                         | Gerard Andrade         |         |
| ~             | ~                         | Bhavna Badiani         |         |
| ~             | ~                         | Jasvinder Bains        |         |

## INVESTIGATORS AND COLLABORATORS: SITE STAFF

Staff on site delegation logs

| City    | Care_Site    | Person_Name             | Site_PI |
|---------|--------------|-------------------------|---------|
| ~       | ~            | Margaret Bowerbank      |         |
| ~       | ~            | Joanne Brady            |         |
| ~       | ~            | Chrissie Butcher        |         |
| ~       | ~            | Janice Carpenter        |         |
| ~       | ~            | Prabir Chakraborti      |         |
| ~       | ~            | Christine Collins       |         |
| ~       | ~            | Siobhan Gettings        |         |
| ~       | ~            | Jonathan Greenland      |         |
| ~       | ~            | Kathryn Herbert         |         |
| ~       | ~            | Iram Husain             |         |
| ~       | ~            | Manisha Joshi           |         |
| ~       | ~            | Roisin Kavanagh         |         |
| ~       | ~            | Rahul Kurup             |         |
| ~       | ~            | Rossana Mancinelli      |         |
| ~       | ~            | Sarah Manyangadze       |         |
| ~       | ~            | Moncy Mathew            |         |
| ~       | ~            | Alice Ngumo             |         |
| ~       | ~            | Sean O'Cathail          |         |
| ~       | ~            | Anna Osadcow            |         |
| ~       | ~            | Cheryl Padilla-Harris   |         |
| ~       | ~            | Niki Panakis            |         |
| ~       | ~            | Andrew Protheroe        |         |
| ~       | ~            | Ami Sabharwal           |         |
| ~       | ~            | Tracey Stammers         |         |
| ~       | ~            | Michelle Taylor-Siddons |         |
| ~       | ~            | Andy Theobold           |         |
| ~       | ~            | Neil Trew-Smith         |         |
| ~       | ~            | Gail Varley             |         |
| ~       | ~            | Janet Weir              |         |
| ~       | ~            | Hazel Wynn              |         |
| Ayr, UK | Ayr Hospital | Hilary Glen             | PI      |
| ~       | ~            | Xia Ren                 | Co-I    |
| ~       | ~            | Jawaher Ansari          |         |

## INVESTIGATORS AND COLLABORATORS: SITE STAFF

Staff on site delegation logs

| City | Care_Site | Person_Name                  | Site_PI |
|------|-----------|------------------------------|---------|
| ~    | ~         | Helena Belikova              |         |
| ~    | ~         | Philip Cannon                |         |
| ~    | ~         | Deborah Dunn                 |         |
| ~    | ~         | Danielle Gilmour             |         |
| ~    | ~         | Dianne Hunter                |         |
| ~    | ~         | Ricky Hunter                 |         |
| ~    | ~         | Jennifer Keith               |         |
| ~    | ~         | Esfandiyar Khan              |         |
| ~    | ~         | Christina Lai                |         |
| ~    | ~         | Kirsten Laws (nee Borthwick) |         |
| ~    | ~         | Clare Love                   |         |
| ~    | ~         | Nicholas Macleod             |         |
| ~    | ~         | Rana Mahmood                 |         |
| ~    | ~         | Jane McClements              |         |
| ~    | ~         | Brian McGlynn                |         |
| ~    | ~         | David McIntosh               |         |
| ~    | ~         | Margaret McKernan            |         |
| ~    | ~         | Lynne McNeil                 |         |
| ~    | ~         | Sharon Meehan                |         |
| ~    | ~         | Jenna Mitchell               |         |
| ~    | ~         | Rebecca Muirhead             |         |
| ~    | ~         | Alison Murphy                |         |
| ~    | ~         | Stefan Nowich                |         |
| ~    | ~         | Kirsty O'Hara                |         |
| ~    | ~         | Kristy Ross                  |         |
| ~    | ~         | Kathleen Smith               |         |
| ~    | ~         | Maureen Templeton            |         |
| ~    | ~         | Lye Mun Tho                  |         |
| ~    | ~         | Aisha Tufail                 |         |
| ~    | ~         | Claudia Turley               |         |
| ~    | ~         | Susan Walton                 |         |
| ~    | ~         | Elaine Watson                |         |
| ~    | ~         | Lillian White                |         |

## INVESTIGATORS AND COLLABORATORS: SITE STAFF

Staff on site delegation logs

| City           | Care_Site                     | Person_Name           | Site_PI |
|----------------|-------------------------------|-----------------------|---------|
| ~              | ~                             | Mark Wilson           |         |
| ~              | ~                             | Diane Woodburn        |         |
| ~              | ~                             | Danna Yorston         |         |
| Barnet, UK     | Barnet General Hospital       | Sarah Needleman       | PI      |
| ~              | ~                             | Ursula McGovern       | Ex-PI   |
| ~              | ~                             | Kimberley Durno       | Co-I    |
| ~              | ~                             | Magdalena Kubiak      | Co-I    |
| ~              | ~                             | Kate Smith            | Co-I    |
| ~              | ~                             | Anita Amadi           |         |
| ~              | ~                             | Alice Coady           |         |
| ~              | ~                             | Danielle Collier      |         |
| ~              | ~                             | Veronica Conteh       |         |
| ~              | ~                             | Andie David           |         |
| ~              | ~                             | Andrew Eichholz       |         |
| ~              | ~                             | Christine Ellis       |         |
| ~              | ~                             | Annette Hawkins       |         |
| ~              | ~                             | Heather Hughes        |         |
| ~              | ~                             | Gillian Marks         |         |
| ~              | ~                             | Anita Mitra           |         |
| ~              | ~                             | Panayiotis Panayiotou |         |
| ~              | ~                             | Prital Patel          |         |
| ~              | ~                             | Emily Scott           |         |
| Barnstaple, UK | North Devon District Hospital | Denise Sheehan        | PI      |
| ~              | ~                             | Victoria Ford         | Co-I    |
| ~              | ~                             | Peter Stephens        | Co-I    |
| ~              | ~                             | Lynsey Balmbra-Jenks  |         |
| ~              | ~                             | Maria Beaumont        |         |
| ~              | ~                             | Helen Black           |         |
| ~              | ~                             | Andy Bull             |         |
| ~              | ~                             | Susan Collard         |         |
| ~              | ~                             | Jenna Furse           |         |
| ~              | ~                             | Henry Goss            |         |
| ~              | ~                             | Joshua Gregory        |         |

## INVESTIGATORS AND COLLABORATORS: SITE STAFF

Staff on site delegation logs

| City            | Care_Site                                | Person_Name            | Site_PI |
|-----------------|------------------------------------------|------------------------|---------|
| ~               | ~                                        | Laura Hanson           |         |
| ~               | ~                                        | Becky Holbrook         |         |
| ~               | ~                                        | Katherine Horder       |         |
| ~               | ~                                        | Faisal Hussain         |         |
| ~               | ~                                        | Natalie Kemp           |         |
| ~               | ~                                        | Elizabeth Kershaw      |         |
| ~               | ~                                        | Michal Ian Lamparski   |         |
| ~               | ~                                        | Samantha Ley           |         |
| ~               | ~                                        | Judyta Lomza           |         |
| ~               | ~                                        | Ajaz Lone              |         |
| ~               | ~                                        | Nyasha Manomano        |         |
| ~               | ~                                        | Maria Martinez         |         |
| ~               | ~                                        | Martin Moody           |         |
| ~               | ~                                        | Chantal Oelofse        |         |
| ~               | ~                                        | Eng Ong                |         |
| ~               | ~                                        | Hannah Ong             |         |
| ~               | ~                                        | Sarah Park             |         |
| ~               | ~                                        | Chloe Peters           |         |
| ~               | ~                                        | Rufus Smith            |         |
| ~               | ~                                        | Amy Thomas             |         |
| ~               | ~                                        | Fiona Thomas           |         |
| ~               | ~                                        | Elizabeth Toy          |         |
| ~               | ~                                        | Lynne Van Koutrik      |         |
| ~               | ~                                        | Lynne Van-Koutrik      |         |
| ~               | ~                                        | Faye Windsor           |         |
| Basingstoke, UK | Basingstoke and North Hampshire Hospital | Sangeeta Paisey        | PI      |
| ~               | ~                                        | Richard Shaffer        | Ex-PI   |
| ~               | ~                                        | Katherine Aitken       |         |
| ~               | ~                                        | David Barlow           |         |
| ~               | ~                                        | Nanda Basker           |         |
| ~               | ~                                        | Louise Beattie         |         |
| ~               | ~                                        | Godfrey Bownie-Mukumbu |         |
| ~               | ~                                        | Rachel Bryan           |         |

## INVESTIGATORS AND COLLABORATORS: SITE STAFF

Staff on site delegation logs

| City | Care_Site | Person_Name               | Site_PI |
|------|-----------|---------------------------|---------|
| ~    | ~         | Jo-Anna Conyngham         |         |
| ~    | ~         | Duncan Cooke              |         |
| ~    | ~         | Victoria Corner           |         |
| ~    | ~         | Abigail Edwards           |         |
| ~    | ~         | Sara Fawcitt              |         |
| ~    | ~         | Adrienn Fazekasne Fulep   |         |
| ~    | ~         | Angela Frith              |         |
| ~    | ~         | Teresa Guerrero-Urbano    |         |
| ~    | ~         | Julie Gwilt               |         |
| ~    | ~         | Liz Happle                |         |
| ~    | ~         | Roger Hudson              |         |
| ~    | ~         | Lauriane Kerwood          |         |
| ~    | ~         | Kathryn Leach (nee Noake) |         |
| ~    | ~         | Eva Letalova              |         |
| ~    | ~         | Christina Narh            |         |
| ~    | ~         | Jenny Nobes               |         |
| ~    | ~         | Bintha Paruthickal        |         |
| ~    | ~         | Christine Podesta         |         |
| ~    | ~         | Pennie Porter             |         |
| ~    | ~         | Helen Richards            |         |
| ~    | ~         | Catherine Rimington       |         |
| ~    | ~         | Fasar Sarwar              |         |
| ~    | ~         | Jackie Smith              |         |
| ~    | ~         | Joanna Stokoe             |         |
| ~    | ~         | Sree Susaria              |         |
| ~    | ~         | Rao Vuyyuru               |         |
| ~    | ~         | Katharine Webb            |         |
| ~    | ~         | Rosalyne Westley          |         |
| ~    | ~         | Ingrid White              |         |
| ~    | ~         | Claire Williams           |         |
| ~    | ~         | Rebecca Wills             |         |
| ~    | ~         | Katie Wood                |         |
| ~    | ~         | Carmen Wu                 |         |



## INVESTIGATORS AND COLLABORATORS: SITE STAFF

Staff on site delegation logs

| City     | Care_Site             | Person_Name          | Site_PI |
|----------|-----------------------|----------------------|---------|
| ~        | ~                     | Hilawati Yusof       |         |
| Bath, UK | Royal United Hospital | Mark Beresford       | PI      |
| ~        | ~                     | Olivera Frim         | Co-I    |
| ~        | ~                     | Catherine McDonald   | Co-I    |
| ~        | ~                     | Nathalie Webber      | Co-I    |
| ~        | ~                     | Tom Wilson           | Co-I    |
| ~        | ~                     | Rowan Appleby        |         |
| ~        | ~                     | Joanne Avis          |         |
| ~        | ~                     | Gareth Ayre          |         |
| ~        | ~                     | Claire Barron        |         |
| ~        | ~                     | Hannah Blades        |         |
| ~        | ~                     | Rachael Bolitho      |         |
| ~        | ~                     | Ruth Brydon-Hill     |         |
| ~        | ~                     | Shaolin Chidavaenzi  |         |
| ~        | ~                     | Vicki Clarke         |         |
| ~        | ~                     | Christine Cox        |         |
| ~        | ~                     | Claire Craige        |         |
| ~        | ~                     | Jane Crozier         |         |
| ~        | ~                     | Samantha Curtis      |         |
| ~        | ~                     | Michael Daly         |         |
| ~        | ~                     | Jackie Davies        |         |
| ~        | ~                     | Claire Davis         |         |
| ~        | ~                     | Frances Du Feu       |         |
| ~        | ~                     | Claire Dyke          |         |
| ~        | ~                     | Christine Elwell     |         |
| ~        | ~                     | Rachael Exley        |         |
| ~        | ~                     | Yuko Francis         |         |
| ~        | ~                     | Beatrice Hamilton    |         |
| ~        | ~                     | Leonie Harrison      |         |
| ~        | ~                     | Lorna Hawley         |         |
| ~        | ~                     | Abigail Jenner       |         |
| ~        | ~                     | Penny Kehagioglou    |         |
| ~        | ~                     | Carly Laxon-Takooree |         |

## INVESTIGATORS AND COLLABORATORS: SITE STAFF

Staff on site delegation logs

| City          | Care_Site                         | Person_Name                | Site_PI |
|---------------|-----------------------------------|----------------------------|---------|
| ~             | ~                                 | Guillaume Livera           |         |
| ~             | ~                                 | Jill MacDonald-Burn        |         |
| ~             | ~                                 | Katarzyna Machura          |         |
| ~             | ~                                 | Margaret Macmillan         |         |
| ~             | ~                                 | Susan Masson               |         |
| ~             | ~                                 | Carey Milsom (nee Logan)   |         |
| ~             | ~                                 | Kate Moloney               |         |
| ~             | ~                                 | Sarah Murdoch              |         |
| ~             | ~                                 | Joseph Needham             |         |
| ~             | ~                                 | Hugh Newman                |         |
| ~             | ~                                 | Abigail Pocock             |         |
| ~             | ~                                 | Vicki Portingale           |         |
| ~             | ~                                 | Bryony Robertson           |         |
| ~             | ~                                 | Matthew Sephton            |         |
| ~             | ~                                 | Eve Tomlinson              |         |
| ~             | ~                                 | Tom Tylee                  |         |
| ~             | ~                                 | Kristelle Vassallo         |         |
| ~             | ~                                 | Rebecca Wassall            |         |
| ~             | ~                                 | Jess White                 |         |
| ~             | ~                                 | Chris Williams             |         |
| ~             | ~                                 | Samantha Williams          |         |
| ~             | ~                                 | Tania Williams (Née Allen) |         |
| ~             | ~                                 | Joanna Wilson              |         |
| Bebington, UK | Clatterbridge Centre for Oncology | Zafar Malik                | PI      |
| ~             | ~                                 | Azman Ibrahim              | Co-I    |
| ~             | ~                                 | Ian Allen                  |         |
| ~             | ~                                 | Wesley Artist              |         |
| ~             | ~                                 | Lisa Dobson (nee Child)    |         |
| ~             | ~                                 | Caroline Dunn              |         |
| ~             | ~                                 | Sharon Dunn (nee Johnson)  |         |
| ~             | ~                                 | Annemieke Earnshaw         |         |
| ~             | ~                                 | Diane Fildes               |         |
| ~             | ~                                 | Helen Flint                |         |

## INVESTIGATORS AND COLLABORATORS: SITE STAFF

Staff on site delegation logs

| City        | Care_Site             | Person_Name         | Site_PI |
|-------------|-----------------------|---------------------|---------|
| ~           | ~                     | Elizabeth Gallimore |         |
| ~           | ~                     | Pat Gillis          |         |
| ~           | ~                     | Sue Green           |         |
| ~           | ~                     | Paul Griffiths      |         |
| ~           | ~                     | Elizabeth Harrison  |         |
| ~           | ~                     | Alison Hassall      |         |
| ~           | ~                     | Jodie Henderson     |         |
| ~           | ~                     | Kathryn Hughes      |         |
| ~           | ~                     | Jess Hulse          |         |
| ~           | ~                     | Helen Innes         |         |
| ~           | ~                     | John Littler        |         |
| ~           | ~                     | Laurie Lomax        |         |
| ~           | ~                     | Linda Lyons         |         |
| ~           | ~                     | Suzanne Maloney     |         |
| ~           | ~                     | Laura McAllister    |         |
| ~           | ~                     | Amir Montazeri      |         |
| ~           | ~                     | Priyank Patel       |         |
| ~           | ~                     | Dawn Porter         |         |
| ~           | ~                     | Sandra Robinson     |         |
| ~           | ~                     | Peter Robson        |         |
| ~           | ~                     | Katie Sloan         |         |
| ~           | ~                     | Matthew Stott       |         |
| ~           | ~                     | Isabel Syndikus     |         |
| ~           | ~                     | Shaun Tolan         |         |
| ~           | ~                     | Emma Whitby         |         |
| ~           | ~                     | Burhan Zavery       |         |
| Belfast, UK | Belfast City Hospital | Joe O'Sullivan      | PI      |
| ~           | ~                     | Suneil Jain         | Co-I    |
| ~           | ~                     | Swati Ray           | Co-I    |
| ~           | ~                     | Poh Lin Shum        | Co-I    |
| ~           | ~                     | Melvyn Ang          |         |
| ~           | ~                     | Ruth Boyd           |         |
| ~           | ~                     | Ellen Brown         |         |

## INVESTIGATORS AND COLLABORATORS: SITE STAFF

Staff on site delegation logs

| City | Care_Site | Person_Name         | Site_PI |
|------|-----------|---------------------|---------|
| ~    | ~         | Aishleen Brunton    |         |
| ~    | ~         | Patricia Calisaya   |         |
| ~    | ~         | Karen Campfield     |         |
| ~    | ~         | Peter Clarke        |         |
| ~    | ~         | Aiden Cole          |         |
| ~    | ~         | Wendy Cunningham    |         |
| ~    | ~         | Benedict Dadebo     |         |
| ~    | ~         | Prantik Das         |         |
| ~    | ~         | Catherine Davidson  |         |
| ~    | ~         | Mairead Devine      |         |
| ~    | ~         | Eileen Dillon       |         |
| ~    | ~         | Geraldine Douris    |         |
| ~    | ~         | Ruth Eakin          |         |
| ~    | ~         | Rachel Ellis        |         |
| ~    | ~         | Rhun Evans          |         |
| ~    | ~         | Ciaran Fairmichael  |         |
| ~    | ~         | Rebecca Goody       |         |
| ~    | ~         | Chris Hagan         |         |
| ~    | ~         | Emma Hanna          |         |
| ~    | ~         | Michael Hanna       |         |
| ~    | ~         | Jackie Harney       |         |
| ~    | ~         | Barbara Harvey      |         |
| ~    | ~         | Eimear Henry        |         |
| ~    | ~         | Stacey Hetherington |         |
| ~    | ~         | Naomi Hill          |         |
| ~    | ~         | Sharon Hynds        |         |
| ~    | ~         | Lucy Jellett        |         |
| ~    | ~         | Ruth Johnston       |         |
| ~    | ~         | Sai Jonnada         |         |
| ~    | ~         | Patrick Keane       |         |
| ~    | ~         | Grace Lavery        |         |
| ~    | ~         | Diane Law           |         |
| ~    | ~         | Alison Logie        |         |

## INVESTIGATORS AND COLLABORATORS: SITE STAFF

Staff on site delegation logs

| City | Care_Site | Person_Name               | Site_PI |
|------|-----------|---------------------------|---------|
| ~    | ~         | Jonathan McAleese         |         |
| ~    | ~         | Chryelle McAlister        |         |
| ~    | ~         | Seosamh McCauley          |         |
| ~    | ~         | Sharon McClean            |         |
| ~    | ~         | Paula McCloskey           |         |
| ~    | ~         | Kairen McCloy             |         |
| ~    | ~         | Sara McCusker(nee Stokes) |         |
| ~    | ~         | Sarah McGahey             |         |
| ~    | ~         | Ciara McIlmunn            |         |
| ~    | ~         | Karen McKenna             |         |
| ~    | ~         | Shirley McKenna           |         |
| ~    | ~         | Aine McKeown              |         |
| ~    | ~         | Michael McMahan           |         |
| ~    | ~         | Linda McNeice             |         |
| ~    | ~         | Darren Mitchell           |         |
| ~    | ~         | Laura Mooney              |         |
| ~    | ~         | Angela Morrison           |         |
| ~    | ~         | Lynsey Morrow             |         |
| ~    | ~         | Lois Mulholland           |         |
| ~    | ~         | Kerry Nicholls            |         |
| ~    | ~         | Adrina O'Donnell          |         |
| ~    | ~         | Karen Parsons             |         |
| ~    | ~         | Jemma Robinson            |         |
| ~    | ~         | Claire Rooney             |         |
| ~    | ~         | Keith Rooney              |         |
| ~    | ~         | Angela Rosbotham          |         |
| ~    | ~         | William Snelling          |         |
| ~    | ~         | David Stewart             |         |
| ~    | ~         | Stephen Stranex           |         |
| ~    | ~         | Fiona Tarpey              |         |
| ~    | ~         | Jonathan Thompson         |         |
| ~    | ~         | Joanne Todd               |         |
| ~    | ~         | Phil Turner               |         |

## INVESTIGATORS AND COLLABORATORS: SITE STAFF

Staff on site delegation logs

| City           | Care_Site                      | Person_Name               | Site_PI |
|----------------|--------------------------------|---------------------------|---------|
| ~              | ~                              | Salil Vengalil            |         |
| Birmingham, UK | Birmingham Heartlands Hospital | Anjali Zarkar             | PI      |
| ~              | ~                              | Kamaldeep Ajimal          |         |
| ~              | ~                              | Chen Bartlett             |         |
| ~              | ~                              | Madhura Chandrashekara    |         |
| ~              | ~                              | Ellen Drew                |         |
| ~              | ~                              | Mary (Ellen) Drew         |         |
| ~              | ~                              | Penny Goodby (nee Harbach |         |
| ~              | ~                              | Samarah Haq               |         |
| ~              | ~                              | Adrian Kelly              |         |
| ~              | ~                              | Jill Lyons                |         |
| ~              | ~                              | Alison Maidment           |         |
| ~              | ~                              | Janet Prentice            |         |
| ~              | ~                              | Julia Sampson             |         |
| ~              | ~                              | Ann Schumacher            |         |
| ~              | ~                              | Frances Shaw              |         |
| ~              | ~                              | Michael Tarn              |         |
| ~              | ~                              | James Whitehouse          |         |
| Birmingham, UK | City Hospital (Birmingham)     | Emilio Porfiri            | PI      |
| ~              | ~                              | Robert Stevenson          | Co-I    |
| ~              | ~                              | Sachin Trivedi            | Co-I    |
| ~              | ~                              | Laura Butler              |         |
| ~              | ~                              | Yin May Chin              |         |
| ~              | ~                              | Joanne Dasgin             |         |
| ~              | ~                              | Debbie Devonport          |         |
| ~              | ~                              | Daniel Ford               |         |
| ~              | ~                              | Brian Gammon              |         |
| ~              | ~                              | Harriet Goddard           |         |
| ~              | ~                              | Jasbinder Kaur            |         |
| ~              | ~                              | Alice Longe               |         |
| ~              | ~                              | Amy Orme                  |         |
| ~              | ~                              | Lalit Pallan              |         |
| ~              | ~                              | Steven Shanu              |         |

## INVESTIGATORS AND COLLABORATORS: SITE STAFF

Staff on site delegation logs

| City           | Care_Site                             | Person_Name              | Site_PI |
|----------------|---------------------------------------|--------------------------|---------|
| ~              | ~                                     | Julie Simpson            |         |
| ~              | ~                                     | Marion Tatman            |         |
| ~              | ~                                     | Angela Williams          |         |
| Birmingham, UK | Queen Elizabeth Hospital (Birmingham) | David Fackrell           | PI      |
| ~              | ~                                     | Nicholas James           | Ex-PI   |
| ~              | ~                                     | Daniel Ford              | Co-I    |
| ~              | ~                                     | Emilio Porfiri           | Co-I    |
| ~              | ~                                     | Kathryn Adams            |         |
| ~              | ~                                     | Salma Afzal              |         |
| ~              | ~                                     | Nicola Anderson          |         |
| ~              | ~                                     | Jay Ansari               |         |
| ~              | ~                                     | Biruk Asfaw              |         |
| ~              | ~                                     | Maria Bandeira           |         |
| ~              | ~                                     | Erica Beaumont           |         |
| ~              | ~                                     | Mahmoda Begum            |         |
| ~              | ~                                     | Shaleen Bishop           |         |
| ~              | ~                                     | Lea Booth                |         |
| ~              | ~                                     | Trish Brady              |         |
| ~              | ~                                     | Emma Bruce               |         |
| ~              | ~                                     | Laura Butler             |         |
| ~              | ~                                     | Laura Caley              |         |
| ~              | ~                                     | Helen Clarke             |         |
| ~              | ~                                     | Gemma Cole               |         |
| ~              | ~                                     | Jane Cook                |         |
| ~              | ~                                     | Amanda Davies            |         |
| ~              | ~                                     | Sara Diffley             |         |
| ~              | ~                                     | Claire Draycott          |         |
| ~              | ~                                     | Alison Grant             |         |
| ~              | ~                                     | Joanna Gray (nee Finney) |         |
| ~              | ~                                     | Daniel Henderson         |         |
| ~              | ~                                     | Rosie Henvey             |         |
| ~              | ~                                     | Jenny Hiley              |         |
| ~              | ~                                     | Sharon Holmes            |         |

## INVESTIGATORS AND COLLABORATORS: SITE STAFF

Staff on site delegation logs

| City          | Care_Site                 | Person_Name             | Site_PI |
|---------------|---------------------------|-------------------------|---------|
| ~             | ~                         | Sam Hopkins (nee Poole) |         |
| ~             | ~                         | Sameed Hussain          |         |
| ~             | ~                         | Heather Jones           |         |
| ~             | ~                         | Helen Jones             |         |
| ~             | ~                         | Pamela Jones            |         |
| ~             | ~                         | Alice Longe             |         |
| ~             | ~                         | Daniella Lynch          |         |
| ~             | ~                         | Fahd Niaz               |         |
| ~             | ~                         | Andrew Palmer           |         |
| ~             | ~                         | Stephanie Palmer        |         |
| ~             | ~                         | Jenny Pascoe            |         |
| ~             | ~                         | Zhane Peterkin          |         |
| ~             | ~                         | Helen Preston           |         |
| ~             | ~                         | Charlotte Sabine        |         |
| ~             | ~                         | Rosemarie Seadon        |         |
| ~             | ~                         | Amna Shah               |         |
| ~             | ~                         | Tracy Soulsby           |         |
| ~             | ~                         | Catherine Stead         |         |
| ~             | ~                         | Lisa Thomas             |         |
| ~             | ~                         | Syed Tirmazy            |         |
| ~             | ~                         | Hannah Tolson           |         |
| ~             | ~                         | Charlotte Tringham      |         |
| ~             | ~                         | Arvind Tripathy         |         |
| ~             | ~                         | Hannah Tween            |         |
| ~             | ~                         | Vishy Veeranna          |         |
| ~             | ~                         | Abel Zachariah          |         |
| ~             | ~                         | Anjali Zarkar           |         |
| Blackburn, UK | Blackburn Royal Infirmary | Natalie Charnley        |         |
| Blackburn, UK | Royal Blackburn Hospital  | Omi Parikh              | PI      |
| ~             | ~                         | Zhu Oong                | Co-I    |
| ~             | ~                         | Sophie Raby             | Co-I    |
| ~             | ~                         | Danya Abdulwahid        |         |
| ~             | ~                         | Ilyas Ahmed             |         |



## INVESTIGATORS AND COLLABORATORS: SITE STAFF

Staff on site delegation logs

| City | Care_Site | Person_Name            | Site_PI |
|------|-----------|------------------------|---------|
| ~    | ~         | Sarah Ainsworth        |         |
| ~    | ~         | Sue Ashworth           |         |
| ~    | ~         | Hazel Aston            |         |
| ~    | ~         | Ana Batista            |         |
| ~    | ~         | Karen Beard            |         |
| ~    | ~         | Gaynor Bowen           |         |
| ~    | ~         | Andrew Brocklehurst    |         |
| ~    | ~         | Fatima Butt            |         |
| ~    | ~         | Jackie Carey           |         |
| ~    | ~         | Naomi Charlton         |         |
| ~    | ~         | Helene Chorley         |         |
| ~    | ~         | Jenny Cockerill-Taylor |         |
| ~    | ~         | Ruth Conroy            |         |
| ~    | ~         | Anthea Cree            |         |
| ~    | ~         | William Croxford       |         |
| ~    | ~         | Falalu Danwata         |         |
| ~    | ~         | Parth Desai            |         |
| ~    | ~         | Joseph Dykes           |         |
| ~    | ~         | Bethany Fielding       |         |
| ~    | ~         | Jan Flaherty           |         |
| ~    | ~         | Diane Forrest          |         |
| ~    | ~         | Helen Frankland        |         |
| ~    | ~         | James Grunshaw         |         |
| ~    | ~         | Samatha Guy            |         |
| ~    | ~         | Imran Haidar           |         |
| ~    | ~         | Hani Hanna             |         |
| ~    | ~         | Jeanette Hargreaves    |         |
| ~    | ~         | Kathryn Hayes          |         |
| ~    | ~         | Angela Hugill          |         |
| ~    | ~         | Andrew Hunnisett       |         |
| ~    | ~         | Rizwana Hussain        |         |
| ~    | ~         | Karen Jewers           |         |
| ~    | ~         | Sarah Keith            |         |

## INVESTIGATORS AND COLLABORATORS: SITE STAFF

Staff on site delegation logs

| City | Care_Site | Person_Name         | Site_PI |
|------|-----------|---------------------|---------|
| ~    | ~         | Prasad Kellati      |         |
| ~    | ~         | Tracey Kilduff      |         |
| ~    | ~         | Stephen Kilroy      |         |
| ~    | ~         | Jennifer King       |         |
| ~    | ~         | Andrew Lancaster    |         |
| ~    | ~         | Jasima Latif        |         |
| ~    | ~         | Matthew Lovell      |         |
| ~    | ~         | Jennifer McCallum   |         |
| ~    | ~         | Alexandra McCarrick |         |
| ~    | ~         | Ajay Mehta          |         |
| ~    | ~         | Twesige Mugisa      |         |
| ~    | ~         | Tanmay Mukhopadhyay |         |
| ~    | ~         | Jackie Nuttall      |         |
| ~    | ~         | Farzana Patel       |         |
| ~    | ~         | Karan Patel         |         |
| ~    | ~         | Graham Read         |         |
| ~    | ~         | Zia Rehman          |         |
| ~    | ~         | Karen Riley         |         |
| ~    | ~         | Christina Robinson  |         |
| ~    | ~         | Darren Rusk         |         |
| ~    | ~         | Janet Ryan-Smith    |         |
| ~    | ~         | Ahmed Salah         |         |
| ~    | ~         | Win Soe             |         |
| ~    | ~         | Helen Spickett      |         |
| ~    | ~         | Philippa Springle   |         |
| ~    | ~         | Dayle Squires       |         |
| ~    | ~         | Debbie Sutton       |         |
| ~    | ~         | Victoria Taylor     |         |
| ~    | ~         | Marianna Theodoulou |         |
| ~    | ~         | Jacqueline Thomas   |         |
| ~    | ~         | Vivienne Tickle     |         |
| ~    | ~         | Richard Walshaw     |         |
| ~    | ~         | Lynsey Waring       |         |

## INVESTIGATORS AND COLLABORATORS: SITE STAFF

Staff on site delegation logs

| City       | Care_Site             | Person_Name                | Site_PI |
|------------|-----------------------|----------------------------|---------|
| ~          | ~                     | Jessica Whiston            |         |
| ~          | ~                     | Deborah Williamson         |         |
| ~          | ~                     | Marcus Wise                |         |
| ~          | ~                     | Maricica Zabrautanu        |         |
| Bolton, UK | Royal Bolton Hospital | Ling Lee                   | PI      |
| ~          | ~                     | Julie Chadwick             |         |
| ~          | ~                     | Shirley Cocks              |         |
| ~          | ~                     | Louise Dawson              |         |
| ~          | ~                     | Tony Elliott               |         |
| ~          | ~                     | Debbie Forkin              |         |
| ~          | ~                     | Zoe Gall                   |         |
| ~          | ~                     | Robert Hull                |         |
| ~          | ~                     | Collette Hunt              |         |
| ~          | ~                     | Janine Hurst               |         |
| ~          | ~                     | Karen Jewers               |         |
| ~          | ~                     | Richard Jones              |         |
| ~          | ~                     | Janet Keegan               |         |
| ~          | ~                     | Karen Lee                  |         |
| ~          | ~                     | Charlotte Lever            |         |
| ~          | ~                     | Ajay Mehta                 |         |
| ~          | ~                     | Raksha Mistry              |         |
| ~          | ~                     | Gillian Mobb               |         |
| ~          | ~                     | Michael Pantelides         |         |
| ~          | ~                     | Hemant Patel               |         |
| ~          | ~                     | Lindsay Rawlinson          |         |
| ~          | ~                     | Sally Shaw                 |         |
| Boston, UK | Pilgrim Hospital      | Thiagarajan Sreenivasan    | PI      |
| ~          | ~                     | Christian Arias            | Co-I    |
| ~          | ~                     | David Ballesteros-Quintail | Co-I    |
| ~          | ~                     | Ana Fernandez-Ots          | Co-I    |
| ~          | ~                     | Sekar (DV) Kittappa        | Co-I    |
| ~          | ~                     | Miguel Panades             | Co-I    |
| ~          | ~                     | Simon Archer               |         |

## INVESTIGATORS AND COLLABORATORS: SITE STAFF

Staff on site delegation logs

| City            | Care_Site                  | Person_Name                   | Site_PI |
|-----------------|----------------------------|-------------------------------|---------|
| ~               | ~                          | Giuseppe Banna                |         |
| ~               | ~                          | Jayne Borley                  |         |
| ~               | ~                          | Eileen Busby                  |         |
| ~               | ~                          | Helen Carolan                 |         |
| ~               | ~                          | Prantik Das                   |         |
| ~               | ~                          | Jo Fletcher                   |         |
| ~               | ~                          | Andrew Judd                   |         |
| ~               | ~                          | Amy Kirkby                    |         |
| ~               | ~                          | Victoria Knight (n. Sherburn) |         |
| ~               | ~                          | Alice Latty                   |         |
| ~               | ~                          | Tara Lawrence nee Palmer      |         |
| ~               | ~                          | Carol Lockwood                |         |
| ~               | ~                          | Beverley Mashegede            |         |
| ~               | ~                          | Karen Metcalf                 |         |
| ~               | ~                          | Sally Ann Molsher             |         |
| ~               | ~                          | Kimberley Netherton           |         |
| ~               | ~                          | Helen Palmer                  |         |
| ~               | ~                          | Kerry Pettitt                 |         |
| ~               | ~                          | Gunjan Phalod                 |         |
| ~               | ~                          | Sindhu Ramamurthy             |         |
| ~               | ~                          | Amanda Roper                  |         |
| ~               | ~                          | Jenny Salmon                  |         |
| ~               | ~                          | Andrew Sloan                  |         |
| ~               | ~                          | Rebecca Spencer               |         |
| ~               | ~                          | Kinga Szymiczek               |         |
| ~               | ~                          | Isobel Thomas                 |         |
| ~               | ~                          | Laura Walsh                   |         |
| ~               | ~                          | Anita Young                   |         |
| Bournemouth, UK | Royal Bournemouth Hospital | Sue Brock                     | PI      |
| ~               | ~                          | George Astras                 |         |
| ~               | ~                          | Natalya Boyd                  |         |
| ~               | ~                          | Eve Broadley                  |         |
| ~               | ~                          | David Chrastek                |         |

## INVESTIGATORS AND COLLABORATORS: SITE STAFF

Staff on site delegation logs

| City         | Care_Site                | Person_Name      | Site_PI |
|--------------|--------------------------|------------------|---------|
| ~            | ~                        | Joe Davies       |         |
| ~            | ~                        | Deborah Hands    |         |
| ~            | ~                        | Alison Hogan     |         |
| ~            | ~                        | Lynsey Houlton   |         |
| ~            | ~                        | Stephanie Jones  |         |
| ~            | ~                        | Tiffany Joyce    |         |
| ~            | ~                        | Katherine Major  |         |
| ~            | ~                        | Rebecca Miln     |         |
| ~            | ~                        | Nicky Naraine    |         |
| ~            | ~                        | Natasha Ottley   |         |
| ~            | ~                        | Kate Preece      |         |
| ~            | ~                        | Laura Purandare  |         |
| ~            | ~                        | Linda Purandare  |         |
| ~            | ~                        | Cathie Purnell   |         |
| ~            | ~                        | Taslima Rabbi    |         |
| ~            | ~                        | Carlton Rowlands |         |
| ~            | ~                        | Sarah Savage     |         |
| ~            | ~                        | Julie Thomson    |         |
| ~            | ~                        | Luke Vamplew     |         |
| ~            | ~                        | Rao Vuyyuru      |         |
| ~            | ~                        | Min Wu           |         |
| Bradford, UK | Bradford Royal Infirmary | Simon Brown      | PI      |
| ~            | ~                        | Michael Flatley  | Co-I    |
| ~            | ~                        | Adel Jebar       | Co-I    |
| ~            | ~                        | Lucy Jones       | Co-I    |
| ~            | ~                        | Eldho Joseph     | Co-I    |
| ~            | ~                        | Louise Karsera   | Co-I    |
| ~            | ~                        | Sally Martin     | Co-I    |
| ~            | ~                        | Sohail Mughal    | Co-I    |
| ~            | ~                        | Lisa Owen        | Co-I    |
| ~            | ~                        | Andrew Viggars   | Co-I    |
| ~            | ~                        | Qamar Akbar      |         |
| ~            | ~                        | Linda Bamford    |         |

## INVESTIGATORS AND COLLABORATORS: SITE STAFF

Staff on site delegation logs

| City | Care_Site | Person_Name             | Site_PI |
|------|-----------|-------------------------|---------|
| ~    | ~         | Richard Benton          |         |
| ~    | ~         | Ian Boon                |         |
| ~    | ~         | Samuel Briggs           |         |
| ~    | ~         | Wendy Cardozo           |         |
| ~    | ~         | Sue Cheeseman           |         |
| ~    | ~         | Osman Chohan            |         |
| ~    | ~         | Ee Siang Choong         |         |
| ~    | ~         | Katy Clarke             |         |
| ~    | ~         | Kay Cockroft            |         |
| ~    | ~         | Victoria Drew           |         |
| ~    | ~         | Emma Dugdale            |         |
| ~    | ~         | Carol Firth             |         |
| ~    | ~         | Robina Ghulam           |         |
| ~    | ~         | Umair Hamid             |         |
| ~    | ~         | Catherine Handforth     |         |
| ~    | ~         | Ann Henry               |         |
| ~    | ~         | Hayley Inman            |         |
| ~    | ~         | Laura Jaques            |         |
| ~    | ~         | Ganesan Jeyasangar      |         |
| ~    | ~         | Charlotte Johnson-Smith |         |
| ~    | ~         | Anne Marie Kay          |         |
| ~    | ~         | Lucille Kenyon          |         |
| ~    | ~         | Sophia Khan             |         |
| ~    | ~         | Leila Koulsi            |         |
| ~    | ~         | Jannika Lazarte         |         |
| ~    | ~         | Dan Lee                 |         |
| ~    | ~         | Carmel Loughrey         |         |
| ~    | ~         | Reem Mahmood            |         |
| ~    | ~         | Leslie Masters          |         |
| ~    | ~         | Elizabeth McIntosh      |         |
| ~    | ~         | Dawn McNulty            |         |
| ~    | ~         | Chandran Nallathambi    |         |
| ~    | ~         | Gail Opio-Te            |         |

## INVESTIGATORS AND COLLABORATORS: SITE STAFF

Staff on site delegation logs

| City         | Care_Site                    | Person_Name          | Site_PI |
|--------------|------------------------------|----------------------|---------|
| ~            | ~                            | Shefali Parikh       |         |
| ~            | ~                            | Mohammed Patel       |         |
| ~            | ~                            | Charlotte Richardson |         |
| ~            | ~                            | Helen Robertshaw     |         |
| ~            | ~                            | Sree Rodda           |         |
| ~            | ~                            | Declan Ryan-Wakeling |         |
| ~            | ~                            | Jane Sewell          |         |
| ~            | ~                            | Finbar Slevin        |         |
| ~            | ~                            | Sophie Stephenson    |         |
| ~            | ~                            | Kelvin Stewart       |         |
| ~            | ~                            | Kim Storton          |         |
| ~            | ~                            | Sarah Tinker         |         |
| ~            | ~                            | Manitha Vinod        |         |
| ~            | ~                            | Eleanor Waldron      |         |
| ~            | ~                            | Lucy Ward            |         |
| ~            | ~                            | Christopher Williams |         |
| ~            | ~                            | Helen Wilson         |         |
| ~            | ~                            | You Yone             |         |
| ~            | ~                            | Jamal Zekri          |         |
| ~            | ~                            | Anthi Zeniou         |         |
| Bradford, UK | St Luke's (Bradford)         | Susan Cheeseman      |         |
| Brighton, UK | Royal Sussex County Hospital | Angus Robinson       | PI      |
| ~            | ~                            | George Plataniotis   | Co-I    |
| ~            | ~                            | Dorota Bak-Blaz      |         |
| ~            | ~                            | Lisa Barrott         |         |
| ~            | ~                            | David Bloomfield     |         |
| ~            | ~                            | Kirsty Bracewell     |         |
| ~            | ~                            | Stephen Brown        |         |
| ~            | ~                            | Maggie Cole          |         |
| ~            | ~                            | Elizabeth Corbett    |         |
| ~            | ~                            | Lucy Curtis          |         |
| ~            | ~                            | George Devtsch       |         |
| ~            | ~                            | Jane Dexter          |         |

## INVESTIGATORS AND COLLABORATORS: SITE STAFF

Staff on site delegation logs

| City | Care_Site | Person_Name         | Site_PI |
|------|-----------|---------------------|---------|
| ~    | ~         | Tarun Durga         |         |
| ~    | ~         | Rachel Rose Edmunds |         |
| ~    | ~         | Emma Foreman        |         |
| ~    | ~         | Paul Frattaroli     |         |
| ~    | ~         | Lisa Furnival       |         |
| ~    | ~         | Jane Hanson         |         |
| ~    | ~         | Andrew Hart         |         |
| ~    | ~         | Daniel Henderson    |         |
| ~    | ~         | Samantha Hodges     |         |
| ~    | ~         | Catherine Hunter    |         |
| ~    | ~         | Summer Ibrahim      |         |
| ~    | ~         | Tamsin Kent         |         |
| ~    | ~         | Ranee Lactao        |         |
| ~    | ~         | Katie Langford      |         |
| ~    | ~         | Poppy Lavender      |         |
| ~    | ~         | Joanne Magennis     |         |
| ~    | ~         | Angela Man          |         |
| ~    | ~         | Pauline Martin      |         |
| ~    | ~         | Sebastien Martin    |         |
| ~    | ~         | Simon Matthews      |         |
| ~    | ~         | Helen Mitchell      |         |
| ~    | ~         | Amy Murray          |         |
| ~    | ~         | Monika Musiol       |         |
| ~    | ~         | Elaine Noon         |         |
| ~    | ~         | Annie Oliver        |         |
| ~    | ~         | Jane Peterson       |         |
| ~    | ~         | George Plantaniotis |         |
| ~    | ~         | Alison Porges       |         |
| ~    | ~         | Tiago Rodrigues     |         |
| ~    | ~         | Tenesa Sargent      |         |
| ~    | ~         | Matthew Seal        |         |
| ~    | ~         | Victoria Sellick    |         |
| ~    | ~         | Jackie Sham         |         |



## INVESTIGATORS AND COLLABORATORS: SITE STAFF

Staff on site delegation logs

| City        | Care_Site                             | Person_Name          | Site_PI |
|-------------|---------------------------------------|----------------------|---------|
| ~           | ~                                     | Jodie Smith          |         |
| ~           | ~                                     | Julie Smith          |         |
| ~           | ~                                     | Jean Tremlett        |         |
| ~           | ~                                     | Sue Trotter          |         |
| ~           | ~                                     | Vivien Tse           |         |
| ~           | ~                                     | Caroline Walker      |         |
| ~           | ~                                     | Karen Walker         |         |
| ~           | ~                                     | Chritianne Whitfield |         |
| ~           | ~                                     | Marie Wilkins        |         |
| ~           | ~                                     | Bobbie Yoong         |         |
| Bristol, UK | Bristol Haematology & Oncology Centre | Amit Bahl            | PI      |
| ~           | ~                                     | Lloyd Abood          |         |
| ~           | ~                                     | Azeem Arshad         |         |
| ~           | ~                                     | Lindsay Ball         |         |
| ~           | ~                                     | Mark Beresford       |         |
| ~           | ~                                     | Sarah Bishop         |         |
| ~           | ~                                     | Jyothsna Chennupati  |         |
| ~           | ~                                     | Marc Coe             |         |
| ~           | ~                                     | Sibusiso Dhladhla    |         |
| ~           | ~                                     | Kay Drury            |         |
| ~           | ~                                     | Harvey Dymond        |         |
| ~           | ~                                     | Emily Foulstone      |         |
| ~           | ~                                     | Polly Gingell        |         |
| ~           | ~                                     | Tristan Grey         |         |
| ~           | ~                                     | Sally-Ann Hall       |         |
| ~           | ~                                     | Chris Herbert        |         |
| ~           | ~                                     | Serena Hilman        |         |
| ~           | ~                                     | Robert Hollister     |         |
| ~           | ~                                     | Amy Holloway         |         |
| ~           | ~                                     | Hayley Jones         |         |
| ~           | ~                                     | Stephen Lang         |         |
| ~           | ~                                     | Jayne Leonard        |         |
| ~           | ~                                     | Susan Masson         |         |

## INVESTIGATORS AND COLLABORATORS: SITE STAFF

Staff on site delegation logs

| City        | Care_Site                | Person_Name                 | Site_PI |
|-------------|--------------------------|-----------------------------|---------|
| ~           | ~                        | Shalini Mohan               |         |
| ~           | ~                        | Hugh Newman                 |         |
| ~           | ~                        | Bryony Parrish              |         |
| ~           | ~                        | Ian Penwarden               |         |
| ~           | ~                        | Nick Robins                 |         |
| ~           | ~                        | Kimberly Rockley            |         |
| ~           | ~                        | Helen Saldanha              |         |
| ~           | ~                        | Sharon Short                |         |
| ~           | ~                        | Beth Thorne                 |         |
| ~           | ~                        | Eve Watson                  |         |
| ~           | ~                        | Sandra Williams (nee Price) |         |
| ~           | ~                        | Paula Wilson                |         |
| ~           | ~                        | Seonaid Wright              |         |
| Bristol, UK | Bristol Royal Infirmary  | Lindsay Ball                |         |
| Burnley, UK | Burnley General Hospital | Omi Parikh                  | PI      |
| ~           | ~                        | Danya Abdulwahid            |         |
| ~           | ~                        | Ilyas Ahmed                 |         |
| ~           | ~                        | Sarah Ainsworth             |         |
| ~           | ~                        | Sue Ashworth                |         |
| ~           | ~                        | Ana Batista                 |         |
| ~           | ~                        | Karen Beard                 |         |
| ~           | ~                        | Gaynor Bowen                |         |
| ~           | ~                        | Andrew Brocklehurst         |         |
| ~           | ~                        | Fatima Butt                 |         |
| ~           | ~                        | Jackie Carey                |         |
| ~           | ~                        | Natalie Charnley            |         |
| ~           | ~                        | Helene Chorley              |         |
| ~           | ~                        | Ruth Conroy                 |         |
| ~           | ~                        | Anthea Cree                 |         |
| ~           | ~                        | Louise Dawson               |         |
| ~           | ~                        | Bethany Fielding            |         |
| ~           | ~                        | Jan Flaherty                |         |
| ~           | ~                        | Diane Forrest               |         |

## INVESTIGATORS AND COLLABORATORS: SITE STAFF

Staff on site delegation logs

| City | Care_Site | Person_Name         | Site_PI |
|------|-----------|---------------------|---------|
| ~    | ~         | Helen Frankland     |         |
| ~    | ~         | Samatha Guy         |         |
| ~    | ~         | Imran Haidar        |         |
| ~    | ~         | Hani Hanna          |         |
| ~    | ~         | Jeanette Hargreaves |         |
| ~    | ~         | Angela Hugill       |         |
| ~    | ~         | Rizwana Hussain     |         |
| ~    | ~         | Karen Jewers        |         |
| ~    | ~         | Sarah Keith         |         |
| ~    | ~         | Prasad Kellati      |         |
| ~    | ~         | Tracey Kilduff      |         |
| ~    | ~         | Stephen Kilroy      |         |
| ~    | ~         | Matthew Lovell      |         |
| ~    | ~         | Alexandra McCarrick |         |
| ~    | ~         | Twesige Mugisa      |         |
| ~    | ~         | Tanmay Mukhopadhyay |         |
| ~    | ~         | Farzana Patel       |         |
| ~    | ~         | Karan Patel         |         |
| ~    | ~         | Zia Rehman          |         |
| ~    | ~         | Karen Riley         |         |
| ~    | ~         | Christina Robinson  |         |
| ~    | ~         | Darren Rusk         |         |
| ~    | ~         | Janet Ryan-Smith    |         |
| ~    | ~         | Ahmed Salah         |         |
| ~    | ~         | Win Soe             |         |
| ~    | ~         | Helen Spickett      |         |
| ~    | ~         | Philippa Springle   |         |
| ~    | ~         | Dayle Squires       |         |
| ~    | ~         | Debbie Sutton       |         |
| ~    | ~         | Victoria Taylor     |         |
| ~    | ~         | Jacqueline Thomas   |         |
| ~    | ~         | Vivienne Tickle     |         |
| ~    | ~         | Richard Walshaw     |         |

## INVESTIGATORS AND COLLABORATORS: SITE STAFF

Staff on site delegation logs

| City                | Care_Site               | Person_Name                | Site_PI |
|---------------------|-------------------------|----------------------------|---------|
| ~                   | ~                       | Lynsey Waring              |         |
| ~                   | ~                       | Deborah Williamson         |         |
| ~                   | ~                       | Marcus Wise                |         |
| Burton-on-Trent, UK | Queen's Hospital Burton | Mike Smith-Howell          | PI      |
| ~                   | ~                       | Ann Adams                  |         |
| ~                   | ~                       | Shahzad Ahmed              |         |
| ~                   | ~                       | Seheli Bandyopahdyay       |         |
| ~                   | ~                       | Gill Bell                  |         |
| ~                   | ~                       | Jo Burns                   |         |
| ~                   | ~                       | Lorraine Carter            |         |
| ~                   | ~                       | Prabir Chakraborti         |         |
| ~                   | ~                       | Shan Chetiyawardana        |         |
| ~                   | ~                       | Rosemary Corfield          |         |
| ~                   | ~                       | Helen Cox                  |         |
| ~                   | ~                       | Helena Cox                 |         |
| ~                   | ~                       | Chris Curtis               |         |
| ~                   | ~                       | Sudipta Datta              |         |
| ~                   | ~                       | Jacqueline Elliott         |         |
| ~                   | ~                       | Katy English (nee Parkes)  |         |
| ~                   | ~                       | Annette Fleet              |         |
| ~                   | ~                       | V Gajek                    |         |
| ~                   | ~                       | Karzan Hama                |         |
| ~                   | ~                       | Sarah Hathaway-Lees        |         |
| ~                   | ~                       | Rajeev Kaushal             |         |
| ~                   | ~                       | Elizabeth Kemp             |         |
| ~                   | ~                       | Christopher Kent           |         |
| ~                   | ~                       | Ali Mahmmod                |         |
| ~                   | ~                       | Rohit Malde                |         |
| ~                   | ~                       | Chandrani Mallik           |         |
| ~                   | ~                       | Hanine Medani              |         |
| ~                   | ~                       | Clare Mewies               |         |
| ~                   | ~                       | Jennifer Moyes             |         |
| ~                   | ~                       | Dakshinamoorthy Muthukumar |         |

## INVESTIGATORS AND COLLABORATORS: SITE STAFF

Staff on site delegation logs

| City                | Care_Site                                       | Person_Name              | Site_PI |
|---------------------|-------------------------------------------------|--------------------------|---------|
| ~                   | ~                                               | Pugazhenthii Pattu       |         |
| ~                   | ~                                               | Divya Ramadasan          |         |
| ~                   | ~                                               | Anita Szita              |         |
| Bury St Edmunds, UK | West Suffolk Hospital                           | Cathryn Woodward         | PI      |
| ~                   | ~                                               | Alex Martin              | Co-I    |
| ~                   | ~                                               | Cherri Blades            |         |
| ~                   | ~                                               | Gill Brett               |         |
| ~                   | ~                                               | Deborah Clements-Dimmock |         |
| ~                   | ~                                               | James Curtis             |         |
| ~                   | ~                                               | Elizabeth Devoy          |         |
| ~                   | ~                                               | Yvonne Field             |         |
| ~                   | ~                                               | Frances Flynn            |         |
| ~                   | ~                                               | Susan Hale               |         |
| ~                   | ~                                               | Mark Heath               |         |
| ~                   | ~                                               | David Matter             |         |
| ~                   | ~                                               | Tracey Murray            |         |
| ~                   | ~                                               | Amanda Neal              |         |
| ~                   | ~                                               | Lisa Patterson           |         |
| ~                   | ~                                               | John Raja Ravendar       |         |
| ~                   | ~                                               | Yvonne Rimmer            |         |
| ~                   | ~                                               | Helen Small              |         |
| ~                   | ~                                               | Jill Thain               |         |
| ~                   | ~                                               | Fred Tuck                |         |
| Camarthen, UK       | Glangwili General (formerly West Wales General) | Mau-Don Phan             | PI      |
| ~                   | ~                                               | Sonya Goriah             | Co-I    |
| ~                   | ~                                               | Samantha Coetzee         |         |
| ~                   | ~                                               | Bleddyn Edwards          |         |
| ~                   | ~                                               | Sandra Evens             |         |
| ~                   | ~                                               | Ann Hewins               |         |
| ~                   | ~                                               | Zohra Omar               |         |
| ~                   | ~                                               | Bryan Phillips           |         |
| ~                   | ~                                               | Meena Raj                |         |
| ~                   | ~                                               | Rocio Riba               |         |

## INVESTIGATORS AND COLLABORATORS: SITE STAFF

Staff on site delegation logs

| City           | Care_Site                    | Person_Name                | Site_PI |
|----------------|------------------------------|----------------------------|---------|
| Cambridge, UK  | Addenbrooke's Hospital       | Danish Mazhar              | PI      |
| ~              | ~                            | Tatiana Hernandez          | Co-I    |
| ~              | ~                            | Rebecca Bradley            |         |
| ~              | ~                            | Anita Chhabra              |         |
| ~              | ~                            | Ellie Couch                |         |
| ~              | ~                            | Gemma Cullen (née Godsall) |         |
| ~              | ~                            | Sandra Cunningham          |         |
| ~              | ~                            | Mirela Hategan             |         |
| ~              | ~                            | Carole Hewitt              |         |
| ~              | ~                            | Luke Hughes-Davies         |         |
| ~              | ~                            | Svitlana Iyevkova          |         |
| ~              | ~                            | Gin Lee                    |         |
| ~              | ~                            | Rachel Lister              |         |
| ~              | ~                            | Debra Mansergh             |         |
| ~              | ~                            | Vanessa Moreira            |         |
| ~              | ~                            | Isaac Opara                |         |
| ~              | ~                            | Simon Pacey                |         |
| ~              | ~                            | Glynn Rolland              |         |
| ~              | ~                            | Matthew Stone              |         |
| ~              | ~                            | Amy Strong n.Chandradass   |         |
| ~              | ~                            | Andrew Styling             |         |
| ~              | ~                            | James Tanner               |         |
| ~              | ~                            | Safaa Therese              |         |
| ~              | ~                            | Nicola Thompson            |         |
| ~              | ~                            | Amanda Walker              |         |
| ~              | ~                            | James Watson               |         |
| ~              | ~                            | Han Wong                   |         |
| ~              | ~                            | Kamarul Zaki               |         |
| Canterbury, UK | Kent and Canterbury Hospital | Carys Thomas               | PI      |
| ~              | ~                            | Patryk Brulinski           | Co-I    |
| ~              | ~                            | Albert Edwards             | Co-I    |
| ~              | ~                            | Joao Galante               | Co-I    |
| ~              | ~                            | Jessica Gough              | Co-I    |

## INVESTIGATORS AND COLLABORATORS: SITE STAFF

Staff on site delegation logs

| City | Care_Site | Person_Name        | Site_PI |
|------|-----------|--------------------|---------|
| ~    | ~         | Jessica Little     | Co-I    |
| ~    | ~         | Natasha Mithal     | Co-I    |
| ~    | ~         | Rakesh Raman       | Co-I    |
| ~    | ~         | Alice Rendall      | Co-I    |
| ~    | ~         | Van Sim            | Co-I    |
| ~    | ~         | Ioannis Trigonis   | Co-I    |
| ~    | ~         | Jennifer Turner    | Co-I    |
| ~    | ~         | Ilyas Ahmed        |         |
| ~    | ~         | Louise Allen       |         |
| ~    | ~         | Bonny Appleby      |         |
| ~    | ~         | Sarah Beasley      |         |
| ~    | ~         | Sharon Beesley     |         |
| ~    | ~         | Hayley Blackgrove  |         |
| ~    | ~         | Tracy Boakes       |         |
| ~    | ~         | Julie Buckley      |         |
| ~    | ~         | Miguel Capo-Mir    |         |
| ~    | ~         | Natalie Catt       |         |
| ~    | ~         | Mathilda Cominos   |         |
| ~    | ~         | Denise Crawford    |         |
| ~    | ~         | Nikki Crisp        |         |
| ~    | ~         | Steve Dann         |         |
| ~    | ~         | Julie-Ann Davies   |         |
| ~    | ~         | Susan Drakeley     |         |
| ~    | ~         | Clary Evans        |         |
| ~    | ~         | Sam Gibson         |         |
| ~    | ~         | Andrew Gillian     |         |
| ~    | ~         | Louise Gladwell    |         |
| ~    | ~         | Coral Greenstreet  |         |
| ~    | ~         | Carolyn Hargreaves |         |
| ~    | ~         | Gemma Hegarty      |         |
| ~    | ~         | Sandra Holness     |         |
| ~    | ~         | Laura Kehoe        |         |
| ~    | ~         | Sue Kelly          |         |

## INVESTIGATORS AND COLLABORATORS: SITE STAFF

Staff on site delegation logs

| City | Care_Site | Person_Name            | Site_PI |
|------|-----------|------------------------|---------|
| ~    | ~         | Rachel Larkins         |         |
| ~    | ~         | Kathryn Lees           |         |
| ~    | ~         | Sarah Lightfoot        |         |
| ~    | ~         | Sarah Lines            |         |
| ~    | ~         | Margaret Lipsham       |         |
| ~    | ~         | Diane Long             |         |
| ~    | ~         | Sydney Loveland        |         |
| ~    | ~         | Rohit Malde            |         |
| ~    | ~         | Kim Mears              |         |
| ~    | ~         | Sharon Middleton       |         |
| ~    | ~         | Christos Mikropoulos   |         |
| ~    | ~         | Arafat Mirza           |         |
| ~    | ~         | Laura Mould            |         |
| ~    | ~         | Kannon Nathan          |         |
| ~    | ~         | Udaiveer Panwar        |         |
| ~    | ~         | Claire Pelham          |         |
| ~    | ~         | Karen Robinson         |         |
| ~    | ~         | Susan Rogers           |         |
| ~    | ~         | Lesley Rose            |         |
| ~    | ~         | Cindy Slater           |         |
| ~    | ~         | Mathini Sridharan      |         |
| ~    | ~         | Caroline Sunderland    |         |
| ~    | ~         | Stephane Tankoua       |         |
| ~    | ~         | Katy Taylor            |         |
| ~    | ~         | Kim Travis             |         |
| ~    | ~         | Alba Tubau             |         |
| ~    | ~         | Ifigenia Vasiliadou    |         |
| ~    | ~         | Kathleen (Kathy) Walsh |         |
| ~    | ~         | Paula Whichelo         |         |
| ~    | ~         | Claire White           |         |
| ~    | ~         | Joanne Williams        |         |
| ~    | ~         | Elizabeth Williamson   |         |
| ~    | ~         | Victoria Williamson    |         |



## INVESTIGATORS AND COLLABORATORS: SITE STAFF

Staff on site delegation logs

| City        | Care_Site                    | Person_Name                 | Site_PI |
|-------------|------------------------------|-----------------------------|---------|
| ~           | ~                            | Marian Wood                 |         |
| ~           | ~                            | Linda Wray                  |         |
| ~           | ~                            | Hilary Zurakovsky           |         |
| Cardiff, UK | University Hospital of Wales | Krishna Narahari            | PI      |
| ~           | ~                            | Elizabeth Bois (nee Harris) |         |
| ~           | ~                            | Helen Clark                 |         |
| ~           | ~                            | Colette Clements            |         |
| ~           | ~                            | Richard Coulthard           |         |
| ~           | ~                            | Lynne Harry                 |         |
| ~           | ~                            | Samantha Holliday           |         |
| ~           | ~                            | Clare Jones                 |         |
| ~           | ~                            | Howard Kynaston             |         |
| ~           | ~                            | Kevin Pearse                |         |
| Cardiff, UK | Velindre Hospital            | Jacob Tanguay               | PI      |
| ~           | ~                            | Jim Barber                  | Co-I    |
| ~           | ~                            | Michael Button              | Co-I    |
| ~           | ~                            | Aida Hanim Kamarudin        | Co-I    |
| ~           | ~                            | Satish Kumar                | Co-I    |
| ~           | ~                            | Malcolm Mason               | Co-I    |
| ~           | ~                            | Nachiappan Palaniappan      | Co-I    |
| ~           | ~                            | John Staffurth              | Co-I    |
| ~           | ~                            | Kathy Bishop                |         |
| ~           | ~                            | Clare Boobier               |         |
| ~           | ~                            | Michael Brown               |         |
| ~           | ~                            | Clair Brunner               |         |
| ~           | ~                            | Lucy Chestney               |         |
| ~           | ~                            | Helen Clark                 |         |
| ~           | ~                            | Lisa Victoria Jane Clayton  |         |
| ~           | ~                            | Jessica Dermott (nee Platt) |         |
| ~           | ~                            | Clare Donnithorne           |         |
| ~           | ~                            | Sarah Fry                   |         |
| ~           | ~                            | Sandra Greenslade           |         |
| ~           | ~                            | Louise Harris               |         |

## INVESTIGATORS AND COLLABORATORS: SITE STAFF

Staff on site delegation logs

| City | Care_Site | Person_Name        | Site_PI |
|------|-----------|--------------------|---------|
| ~    | ~         | Nida Hassan        |         |
| ~    | ~         | Robert Henley      |         |
| ~    | ~         | Toby Hiscott       |         |
| ~    | ~         | Lynda Holman       |         |
| ~    | ~         | Gareth Hunt        |         |
| ~    | ~         | Amanda Jackson     |         |
| ~    | ~         | Rashmi Jadon       |         |
| ~    | ~         | Catherine John     |         |
| ~    | ~         | Alison Johnson     |         |
| ~    | ~         | Necia Jones        |         |
| ~    | ~         | Colette Kemp       |         |
| ~    | ~         | Lynette Lane       |         |
| ~    | ~         | Donna Lear         |         |
| ~    | ~         | Jason Lester       |         |
| ~    | ~         | Ross McLeish       |         |
| ~    | ~         | James Morgan       |         |
| ~    | ~         | Louise Morgan      |         |
| ~    | ~         | Phillip Morgan     |         |
| ~    | ~         | Diana Mort         |         |
| ~    | ~         | Debbie O'Connor    |         |
| ~    | ~         | Renata Poole       |         |
| ~    | ~         | Karen Pow          |         |
| ~    | ~         | Joanne Preece      |         |
| ~    | ~         | Leanne Quinn       |         |
| ~    | ~         | Tracy Rees         |         |
| ~    | ~         | Vicki Reynolds     |         |
| ~    | ~         | Cathy Richards     |         |
| ~    | ~         | Jayne Richards     |         |
| ~    | ~         | Emily Rumney       |         |
| ~    | ~         | Christian Smith    |         |
| ~    | ~         | Lisa Stafford      |         |
| ~    | ~         | Catherine Sullivan |         |
| ~    | ~         | Loretta Sweeney    |         |

## INVESTIGATORS AND COLLABORATORS: SITE STAFF

Staff on site delegation logs

| City           | Care_Site            | Person_Name               | Site_PI |
|----------------|----------------------|---------------------------|---------|
| ~              | ~                    | Hana Thomas               |         |
| ~              | ~                    | Bethan Tranter            |         |
| ~              | ~                    | Caroline Vitolo           |         |
| ~              | ~                    | Lucy Wilbraham            |         |
| ~              | ~                    | Gillian Willetts          |         |
| ~              | ~                    | Kay Wilson                |         |
| ~              | ~                    | Charlotte Young           |         |
| Carlisle, UK   | Cumberland Infirmary | Fiona Douglas             | PI      |
| ~              | ~                    | Anil Kumar                | PI      |
| ~              | ~                    | Angela Birt               |         |
| ~              | ~                    | Christopher Brewer        |         |
| ~              | ~                    | Diane Donnelly            |         |
| ~              | ~                    | Charlotte Eyles           |         |
| ~              | ~                    | Grace Fryer               |         |
| ~              | ~                    | Ivor Hughes               |         |
| ~              | ~                    | Patricia Nicholls         |         |
| ~              | ~                    | Jonathan Nicoll           |         |
| ~              | ~                    | Muhammad Rahman           |         |
| ~              | ~                    | Norma Sidek               |         |
| ~              | ~                    | Jenna Wildey              |         |
| ~              | ~                    | Beverley Wilkinson        |         |
| ~              | ~                    | Fergus Young              |         |
| Chelmsford, UK | Broomfield Hospital  | Abdel Hamid               | PI      |
| ~              | ~                    | Gopalakrishnan Srinivasan | Co-I    |
| ~              | ~                    | Victoria Apps             |         |
| ~              | ~                    | Christian Barnett         |         |
| ~              | ~                    | Melanie Boxall            |         |
| ~              | ~                    | Donna Briggs              |         |
| ~              | ~                    | Frances Cairns            |         |
| ~              | ~                    | Tracey Camburn            |         |
| ~              | ~                    | Emma Cannon               |         |
| ~              | ~                    | Jennifer Child            |         |
| ~              | ~                    | Lucy Cooper               |         |

## INVESTIGATORS AND COLLABORATORS: SITE STAFF

Staff on site delegation logs

| City           | Care_Site                   | Person_Name          | Site_PI |
|----------------|-----------------------------|----------------------|---------|
| ~              | ~                           | Elizabeth Dawson     |         |
| ~              | ~                           | Sarah Ferguson       |         |
| ~              | ~                           | Sian Gibson          |         |
| ~              | ~                           | Jane Giles           |         |
| ~              | ~                           | Dane Goodere-Bennett |         |
| ~              | ~                           | Kiran Kancherla      |         |
| ~              | ~                           | Priscilla Leone      |         |
| ~              | ~                           | Yvonne Lester        |         |
| ~              | ~                           | Isabella Maund       |         |
| ~              | ~                           | Emma Mitchell        |         |
| ~              | ~                           | Udaiveer Panwar      |         |
| ~              | ~                           | Enca Parsons         |         |
| ~              | ~                           | Melanie Ruben        |         |
| ~              | ~                           | Victoria Scott       |         |
| ~              | ~                           | Bryan Singizi        |         |
| ~              | ~                           | Edel Spruce          |         |
| ~              | ~                           | Amon Wijunamai       |         |
| ~              | ~                           | Lucy Willsher        |         |
| ~              | ~                           | You Yone             |         |
| Cheltenham, UK | Cheltenham General Hospital | Jo Bowen             | PI      |
| ~              | ~                           | Peter Jenkins        | Co-I    |
| ~              | ~                           | Julie Allen          |         |
| ~              | ~                           | Susan Anderson       |         |
| ~              | ~                           | Charlotte Ayrton     |         |
| ~              | ~                           | Helen Babbage        |         |
| ~              | ~                           | Rehana Bakawala      |         |
| ~              | ~                           | Sarah Beazer         |         |
| ~              | ~                           | Victoria Bell        |         |
| ~              | ~                           | Vishal Bhalla        |         |
| ~              | ~                           | Lucy Blake           |         |
| ~              | ~                           | Caitlin Bowden       |         |
| ~              | ~                           | Rachel Carter        |         |
| ~              | ~                           | Bethan Cartwright    |         |

## INVESTIGATORS AND COLLABORATORS: SITE STAFF

Staff on site delegation logs

| City        | Care_Site                    | Person_Name              | Site_PI |
|-------------|------------------------------|--------------------------|---------|
| ~           | ~                            | Jyothsna Chennupati      |         |
| ~           | ~                            | Jill Chittock            |         |
| ~           | ~                            | Audrey Cook              |         |
| ~           | ~                            | Samuel Croly             |         |
| ~           | ~                            | Lin Crossley             |         |
| ~           | ~                            | Jennifer Dewett          |         |
| ~           | ~                            | Rachel Durrant           |         |
| ~           | ~                            | Chris Ford               |         |
| ~           | ~                            | Janet Forkes             |         |
| ~           | ~                            | Julia Hall               |         |
| ~           | ~                            | Jennifer Healey-Mariano  |         |
| ~           | ~                            | Ian Ingledew             |         |
| ~           | ~                            | Sai Jonnada              |         |
| ~           | ~                            | Louise Kidner            |         |
| ~           | ~                            | Laura Malins             |         |
| ~           | ~                            | Rebecca Mesher           |         |
| ~           | ~                            | Roger Owen               |         |
| ~           | ~                            | Elisabeth Read           |         |
| ~           | ~                            | Rachel Sayers            |         |
| ~           | ~                            | Elaine Sizer             |         |
| ~           | ~                            | Amy Skelton              |         |
| ~           | ~                            | Jennifer Smith           |         |
| ~           | ~                            | Sarah Stanley            |         |
| ~           | ~                            | Duncan Stow              |         |
| ~           | ~                            | Abi Stuart               |         |
| ~           | ~                            | Catherine Stuart-Grumbar |         |
| ~           | ~                            | Matthew Tan              |         |
| ~           | ~                            | Kate Trigg-Hogarth       |         |
| ~           | ~                            | Richard Wallis           |         |
| ~           | ~                            | Alex Williams            |         |
| ~           | ~                            | Sue Wronski              |         |
| Chester, UK | Countess of Chester Hospital | Azman Ibrahim            | PI      |
| ~           | ~                            | Mary Aldous              |         |

## INVESTIGATORS AND COLLABORATORS: SITE STAFF

Staff on site delegation logs

| City           | Care_Site                   | Person_Name                | Site_PI |
|----------------|-----------------------------|----------------------------|---------|
| ~              | ~                           | Ian Allen                  |         |
| ~              | ~                           | Denise Archer              |         |
| ~              | ~                           | Wesley Artist              |         |
| ~              | ~                           | Emma Barry                 |         |
| ~              | ~                           | Lucy Beresford             |         |
| ~              | ~                           | Kathryn Cawley             |         |
| ~              | ~                           | Lisa Dobson (nee Child)    |         |
| ~              | ~                           | Helen Eccleson             |         |
| ~              | ~                           | Chelcie Faulkner           |         |
| ~              | ~                           | Elizabeth Gallimore        |         |
| ~              | ~                           | Sue Green                  |         |
| ~              | ~                           | Rebecca Grogan             |         |
| ~              | ~                           | Jenny Grounds              |         |
| ~              | ~                           | Rebecca Hopcroft           |         |
| ~              | ~                           | Sarah Illingworth          |         |
| ~              | ~                           | Helen Elizabeth Jeffrey    |         |
| ~              | ~                           | Grace McGrath              |         |
| ~              | ~                           | Jenny Miller               |         |
| ~              | ~                           | Judith Prince              |         |
| ~              | ~                           | Shannon Spicer             |         |
| ~              | ~                           | Janet Spriggs              |         |
| ~              | ~                           | Joshua Williams            |         |
| Colchester, UK | Colchester General Hospital | Dakshinamoorthy Muthukumar | PI      |
| ~              | ~                           | Devy Basu                  | Co-I    |
| ~              | ~                           | Rana Mahmood               | Co-I    |
| ~              | ~                           | Bruce Sizer                | Co-I    |
| ~              | ~                           | Anita Szita                | Co-I    |
| ~              | ~                           | Katrina Cooke              |         |
| ~              | ~                           | Nicola Cutmore             |         |
| ~              | ~                           | Celine Driscoll            |         |
| ~              | ~                           | Michelle Fisher            |         |
| ~              | ~                           | Richard Gant               |         |
| ~              | ~                           | Hayley Hewer               |         |

## INVESTIGATORS AND COLLABORATORS: SITE STAFF

Staff on site delegation logs

| City           | Care_Site             | Person_Name         | Site_PI |
|----------------|-----------------------|---------------------|---------|
| ~              | ~                     | Liz Hunting         |         |
| ~              | ~                     | Jane Ketley-O'Donel |         |
| ~              | ~                     | Muthar Kumar        |         |
| ~              | ~                     | Louies Mabelin      |         |
| ~              | ~                     | Michelle Marshall   |         |
| ~              | ~                     | Sunil Skaria        |         |
| ~              | ~                     | Daisuke Takeuchi    |         |
| ~              | ~                     | Lucy Thorogood      |         |
| Colchester, UK | Essex County Hospital | Devy Basu           |         |
| ~              | ~                     | Lorna Dewar         |         |
| ~              | ~                     | Celine Driscoll     |         |
| ~              | ~                     | Hayley Hewer        |         |
| ~              | ~                     | Liz Hunting         |         |
| ~              | ~                     | Jane Ketley-O'Donel |         |
| ~              | ~                     | Muthar Kumar        |         |
| ~              | ~                     | Michelle Marshall   |         |
| ~              | ~                     | Pugazhenthii Pattu  |         |
| ~              | ~                     | Bruce Sizer         |         |
| ~              | ~                     | Lucy Thorogood      |         |
| Cottingham, UK | Castle Hill Hospital  | Matthew Simms       | PI      |
| ~              | ~                     | Faheem Bashir       | Co-I    |
| ~              | ~                     | Mohammad Butt       | Co-I    |
| ~              | ~                     | Mohan Hingorani     | Co-I    |
| ~              | ~                     | Mateen Akhtar       |         |
| ~              | ~                     | Ian Beckley         |         |
| ~              | ~                     | Linzi Bone          |         |
| ~              | ~                     | George Bozat        |         |
| ~              | ~                     | Sarah Brown         |         |
| ~              | ~                     | Suzy Bunton         |         |
| ~              | ~                     | Bob Bush            |         |
| ~              | ~                     | Mary Garthwaite     |         |
| ~              | ~                     | Jonathan Gill       |         |
| ~              | ~                     | John Hetherington   |         |

## INVESTIGATORS AND COLLABORATORS: SITE STAFF

Staff on site delegation logs

| City         | Care_Site                                     | Person_Name               | Site_PI |
|--------------|-----------------------------------------------|---------------------------|---------|
| ~            | ~                                             | Carol Hodson              |         |
| ~            | ~                                             | Linda Hoggarth            |         |
| ~            | ~                                             | Louise Karsera            |         |
| ~            | ~                                             | Vicki Lowthorpe           |         |
| ~            | ~                                             | Jenny Marsden             |         |
| ~            | ~                                             | Sarah Moffat              |         |
| ~            | ~                                             | Iqtedar Muazzam           |         |
| ~            | ~                                             | Paula O'Reilly            |         |
| ~            | ~                                             | Sarah Palmer              |         |
| ~            | ~                                             | Kristian Plowman          |         |
| ~            | ~                                             | Dulani Ranatunge          |         |
| ~            | ~                                             | Julie Rawlings            |         |
| ~            | ~                                             | Lucy Richardson           |         |
| ~            | ~                                             | Karen Stubbs              |         |
| ~            | ~                                             | Adam Wolstencroft         |         |
| ~            | ~                                             | A Yousuff                 |         |
| ~            | ~                                             | Khawaje Zahid             |         |
| Coventry, UK | Coventry and Warwickshire Hospital            | Leila Fortunato           |         |
| Coventry, UK | University Hospital Coventry and Warwickshire | Jane Worliding            | PI      |
| ~            | ~                                             | Joanna Hamilton           | Co-I    |
| ~            | ~                                             | Shah Rafique              | Co-I    |
| ~            | ~                                             | Rebecca Aaron             |         |
| ~            | ~                                             | Jason Allen               |         |
| ~            | ~                                             | Senthil Kumar Athmanathan |         |
| ~            | ~                                             | Rachel Bazeley            |         |
| ~            | ~                                             | Maggie Brown              |         |
| ~            | ~                                             | Vikki Browne              |         |
| ~            | ~                                             | Dannielle Burgess         |         |
| ~            | ~                                             | Luanne Carey              |         |
| ~            | ~                                             | Andrew Chan               |         |
| ~            | ~                                             | Rajbinder Deol            |         |
| ~            | ~                                             | Theresa Griffiths         |         |
| ~            | ~                                             | Kieran Jefferson          |         |



## INVESTIGATORS AND COLLABORATORS: SITE STAFF

Staff on site delegation logs

| City      | Care_Site         | Person_Name           | Site_PI |
|-----------|-------------------|-----------------------|---------|
| ~         | ~                 | Mohammed Khan         |         |
| ~         | ~                 | Yakhub Khan           |         |
| ~         | ~                 | Donald Macdonald      |         |
| ~         | ~                 | Fiona McGurk          |         |
| ~         | ~                 | Lucy Miller           |         |
| ~         | ~                 | Albert Misleng        |         |
| ~         | ~                 | Mohamed Mooradun      |         |
| ~         | ~                 | Su Ngwenya            |         |
| ~         | ~                 | Zoe O'Neill           |         |
| ~         | ~                 | Sarah O'Toole         |         |
| ~         | ~                 | Karandeepu Pachoo     |         |
| ~         | ~                 | Sonia Powell          |         |
| ~         | ~                 | Sue Robinson          |         |
| ~         | ~                 | Sukhbinder Salh       |         |
| ~         | ~                 | Noor Ayesha Shah      |         |
| ~         | ~                 | Elaine Simmons        |         |
| ~         | ~                 | Laura Stanley         |         |
| ~         | ~                 | Andrew Stockdale      |         |
| ~         | ~                 | Vicky Sturgess        |         |
| ~         | ~                 | Charlie-marie Suddens |         |
| ~         | ~                 | Rachel Thompson       |         |
| ~         | ~                 | Fiona Tranter         |         |
| ~         | ~                 | Jenny Warmington      |         |
| ~         | ~                 | Mark Whitmore         |         |
| ~         | ~                 | Linda Wimbush         |         |
| Crewe, UK | Leighton Hospital | Anna Tran             | PI      |
| ~         | ~                 | Vanessa Adamson       |         |
| ~         | ~                 | Carole Bennion        |         |
| ~         | ~                 | Kim Best              |         |
| ~         | ~                 | Michael Braun         |         |
| ~         | ~                 | David Butterworth     |         |
| ~         | ~                 | Lydia Buxton          |         |
| ~         | ~                 | Osman Chohan          |         |

## INVESTIGATORS AND COLLABORATORS: SITE STAFF

Staff on site delegation logs

| City           | Care_Site                    | Person_Name         | Site_PI |
|----------------|------------------------------|---------------------|---------|
| ~              | ~                            | William Croxford    |         |
| ~              | ~                            | Thiraviyam Elumalai |         |
| ~              | ~                            | Leanne Everall      |         |
| ~              | ~                            | Julia Gemmell       |         |
| ~              | ~                            | Sarah Hoswell       |         |
| ~              | ~                            | Adele Hough         |         |
| ~              | ~                            | Chris Hough         |         |
| ~              | ~                            | P Irwin             |         |
| ~              | ~                            | P Javle             |         |
| ~              | ~                            | Taya Jones          |         |
| ~              | ~                            | Tracy Larcombe      |         |
| ~              | ~                            | Carolyn Mansfield   |         |
| ~              | ~                            | Emma Margerum       |         |
| ~              | ~                            | Julie Meir          |         |
| ~              | ~                            | Gemma Nash          |         |
| ~              | ~                            | Andrew Ritchings    |         |
| ~              | ~                            | Rachel Smith        |         |
| ~              | ~                            | Catherine Thompson  |         |
| ~              | ~                            | Sarah Tinsley       |         |
| ~              | ~                            | Caroline Walker     |         |
| ~              | ~                            | James Wylie         |         |
| Croydon, UK    | Croydon University Hospital  | Cheryl Batish       |         |
| ~              | ~                            | Yvonne Campbell     |         |
| ~              | ~                            | Anne Haldeos        |         |
| ~              | ~                            | Ann Payne           |         |
| ~              | ~                            | Jane Thomson        |         |
| Darlington, UK | Darlington Memorial Hospital | Mohammed Kagzi      | PI      |
| ~              | ~                            | Rachel Chatt        |         |
| ~              | ~                            | Alison Chilvers     |         |
| ~              | ~                            | Penny Gamble        |         |
| ~              | ~                            | Helen Haley         |         |
| ~              | ~                            | John Hardman        |         |
| ~              | ~                            | Claire Henderson    |         |

## INVESTIGATORS AND COLLABORATORS: SITE STAFF

Staff on site delegation logs

| City         | Care_Site                      | Person_Name                | Site_PI |
|--------------|--------------------------------|----------------------------|---------|
| ~            | ~                              | Hyder Latif                |         |
| ~            | ~                              | Julia McBride              |         |
| ~            | ~                              | Lorna Morgan               |         |
| ~            | ~                              | Tanmay Mukhopadhyay        |         |
| ~            | ~                              | Richard Nendick            |         |
| ~            | ~                              | Clive Peedell              |         |
| ~            | ~                              | Calum Polwart              |         |
| ~            | ~                              | Steven Pratt               |         |
| ~            | ~                              | Asia Sarwar                |         |
| ~            | ~                              | Jane Shaw                  |         |
| ~            | ~                              | Kimberly Stamp             |         |
| ~            | ~                              | Lynsey Stephenson          |         |
| ~            | ~                              | Jonathan Stoddard          |         |
| ~            | ~                              | Fiona Strong               |         |
| ~            | ~                              | John Vickers               |         |
| ~            | ~                              | Susan Wadd                 |         |
| Dartford, UK | Darent Valley Hospital         | Louise Lacey               |         |
| Derby, UK    | London Road Community Hospital | Kay Bowdler                |         |
| ~            | ~                              | Prabir Chakraborti         |         |
| ~            | ~                              | Debbie Davis               |         |
| ~            | ~                              | Kristina Duggleby          |         |
| ~            | ~                              | Sarah Hare                 |         |
| ~            | ~                              | Sarah Hathaway-Lees        |         |
| ~            | ~                              | Heini Jussila              |         |
| ~            | ~                              | Jane Lawrie                |         |
| ~            | ~                              | Wendy Morrisroe            |         |
| ~            | ~                              | Dakshinamoorthy Muthukumar |         |
| ~            | ~                              | Karen Simmonds             |         |
| ~            | ~                              | Keeley Smith               |         |
| ~            | ~                              | Colin Ward                 |         |
| Derby, UK    | Royal Derby Hospital           | Prantik Das                | PI      |
| ~            | ~                              | Wendy Abbott               |         |
| ~            | ~                              | Shahzad Ahmed              |         |

## INVESTIGATORS AND COLLABORATORS: SITE STAFF

Staff on site delegation logs

| City | Care_Site | Person_Name              | Site_PI |
|------|-----------|--------------------------|---------|
| ~    | ~         | James Aldous             |         |
| ~    | ~         | Donna Beal               |         |
| ~    | ~         | Elizabeth Bedford        |         |
| ~    | ~         | Liz Bedford              |         |
| ~    | ~         | Helen Beveridge          |         |
| ~    | ~         | Sathan Boonyaprapa       |         |
| ~    | ~         | Sonya Bradshaw           |         |
| ~    | ~         | Louise Brookes           |         |
| ~    | ~         | Alison Carrick           |         |
| ~    | ~         | Prabir Chakraborti       |         |
| ~    | ~         | Josephine Chmiel         |         |
| ~    | ~         | Caroline Coulson         |         |
| ~    | ~         | Kiran Das                |         |
| ~    | ~         | Julie Dockree            |         |
| ~    | ~         | Charlotte Downes         |         |
| ~    | ~         | Julie Edmonds            |         |
| ~    | ~         | Jodie Fitzgerald         |         |
| ~    | ~         | Aaron Gallagher          |         |
| ~    | ~         | Marie Ann Goldsworthy    |         |
| ~    | ~         | Sarah Hare               |         |
| ~    | ~         | Margaret Harper          |         |
| ~    | ~         | Gemma Irvine             |         |
| ~    | ~         | Christopher Kent         |         |
| ~    | ~         | Sarah Longhurst          |         |
| ~    | ~         | Fanuel Magaya            |         |
| ~    | ~         | Peter Mason              |         |
| ~    | ~         | Alastair McCabe          |         |
| ~    | ~         | Lucy McCandless          |         |
| ~    | ~         | Lorraine McDonald        |         |
| ~    | ~         | Nicole McKee             |         |
| ~    | ~         | Nicole McKee (nee Isitt) |         |
| ~    | ~         | Jennifer Mitchell        |         |
| ~    | ~         | Wendy Morrisroe          |         |

## INVESTIGATORS AND COLLABORATORS: SITE STAFF

Staff on site delegation logs

| City          | Care_Site                 | Person_Name                | Site_PI |
|---------------|---------------------------|----------------------------|---------|
| ~             | ~                         | Thangarajah Mugunthan      |         |
| ~             | ~                         | Dakshinamoorthy Muthukumar |         |
| ~             | ~                         | Elizabeth Nadin            |         |
| ~             | ~                         | Ajith Gopinathan Nair      |         |
| ~             | ~                         | Pugazhenthii Pattu         |         |
| ~             | ~                         | Ellie Piggott              |         |
| ~             | ~                         | Timothy Podd               |         |
| ~             | ~                         | Ayman Ramadan              |         |
| ~             | ~                         | Gemma Redfern              |         |
| ~             | ~                         | Manni Sandhu               |         |
| ~             | ~                         | Karen Simmonds             |         |
| ~             | ~                         | Virgil Sivoglo             |         |
| ~             | ~                         | Kashmira Subramanian       |         |
| ~             | ~                         | Sarah Taylor               |         |
| ~             | ~                         | Janet Tomlinson            |         |
| ~             | ~                         | Colin Ward                 |         |
| ~             | ~                         | Claire Wintle              |         |
| ~             | ~                         | Chris Worth                |         |
| ~             | ~                         | Georgia Wright             |         |
| Doncaster, UK | Doncaster Royal Infirmary | Carmel Pezaro              | PI      |
| ~             | ~                         | Virgil Sivoglo             | Ex-PI   |
| ~             | ~                         | Lucy Smith                 | Co-I    |
| ~             | ~                         | Jessica Tay                | Co-I    |
| ~             | ~                         | Sharon Ann Allen           |         |
| ~             | ~                         | Mymoona Alzouebi           |         |
| ~             | ~                         | Sarah Brown                |         |
| ~             | ~                         | Barbara Burlace            |         |
| ~             | ~                         | Robert Chadwick            |         |
| ~             | ~                         | Rachel Codling             |         |
| ~             | ~                         | Joanne Derx                |         |
| ~             | ~                         | Ben East                   |         |
| ~             | ~                         | Laura Ellis                |         |
| ~             | ~                         | Catherine Ferguson         |         |

## INVESTIGATORS AND COLLABORATORS: SITE STAFF

Staff on site delegation logs

| City           | Care_Site              | Person_Name                 | Site_PI |
|----------------|------------------------|-----------------------------|---------|
| ~              | ~                      | Janet Field                 |         |
| ~              | ~                      | Alexandra Firth             |         |
| ~              | ~                      | Meredyth Harris             |         |
| ~              | ~                      | Mark Holliday               |         |
| ~              | ~                      | Nicole Jeffcutt             |         |
| ~              | ~                      | Joanne McNally              |         |
| ~              | ~                      | Amy Neal                    |         |
| ~              | ~                      | Muneeb Qureshi              |         |
| ~              | ~                      | Janine Smedley (nee McCabe) |         |
| ~              | ~                      | Jennifer Taylor             |         |
| ~              | ~                      | Deborah Walstow             |         |
| ~              | ~                      | Lisa Warren                 |         |
| ~              | ~                      | Nicola Wilkinson            |         |
| ~              | ~                      | Kim Wood                    |         |
| Dorchester, UK | Dorset County Hospital | Benjamin Masters            | PI      |
| ~              | ~                      | Naveed Afzal                |         |
| ~              | ~                      | Beverley Anderson           |         |
| ~              | ~                      | Stephen Andrews             |         |
| ~              | ~                      | Pauline Ashcroft            |         |
| ~              | ~                      | Piet Bakker                 |         |
| ~              | ~                      | Lynn Billett                |         |
| ~              | ~                      | Robert Blegay               |         |
| ~              | ~                      | Laura Bough                 |         |
| ~              | ~                      | Sally Breakspear            |         |
| ~              | ~                      | Susan Carr                  |         |
| ~              | ~                      | Ananda Chakrabarti          |         |
| ~              | ~                      | Andrew Cornaby              |         |
| ~              | ~                      | Perric Crellin              |         |
| ~              | ~                      | Andrew Gibbins              |         |
| ~              | ~                      | Jackie Gibbins              |         |
| ~              | ~                      | Tracy Glen                  |         |
| ~              | ~                      | Josie Goodsell              |         |
| ~              | ~                      | Sarah Horton                |         |

## INVESTIGATORS AND COLLABORATORS: SITE STAFF

Staff on site delegation logs

| City       | Care_Site              | Person_Name         | Site_PI |
|------------|------------------------|---------------------|---------|
| ~          | ~                      | Stephanie Jones     |         |
| ~          | ~                      | Sally Love          |         |
| ~          | ~                      | Louise O'Shea       |         |
| ~          | ~                      | Andrew Rees         |         |
| ~          | ~                      | Simon Sharpe        |         |
| ~          | ~                      | Delia Whiteman      |         |
| ~          | ~                      | Suzy Wignall        |         |
| ~          | ~                      | Sarah Williams      |         |
| Dudley, UK | Russells Hall Hospital | Pek Keng-Koh        | PI      |
| ~          | ~                      | Mano Joseph         | Co-I    |
| ~          | ~                      | Joseph Mano         | Co-I    |
| ~          | ~                      | Paul Anderson       |         |
| ~          | ~                      | Joann Atkinson      |         |
| ~          | ~                      | David Edwards       |         |
| ~          | ~                      | Lesley Edwards      |         |
| ~          | ~                      | Lawrence Emtage     |         |
| ~          | ~                      | Irene Gardner       |         |
| ~          | ~                      | Georgi Georgiev     |         |
| ~          | ~                      | Dee Harris          |         |
| ~          | ~                      | Kath Harrow         |         |
| ~          | ~                      | Nadira Jilani       |         |
| ~          | ~                      | Ruckie Kahlon       |         |
| ~          | ~                      | Jayne Kanwar        |         |
| ~          | ~                      | Karen Kanyi         |         |
| ~          | ~                      | Sally Keates-Porter |         |
| ~          | ~                      | Julie Matthews      |         |
| ~          | ~                      | Heather McClure     |         |
| ~          | ~                      | Emily McDonald      |         |
| ~          | ~                      | Karen McGarry       |         |
| ~          | ~                      | Vanessa Moore       |         |
| ~          | ~                      | Andrew Moores       |         |
| ~          | ~                      | Jenny O'Grady       |         |
| ~          | ~                      | Manesh Patel        |         |

## INVESTIGATORS AND COLLABORATORS: SITE STAFF

Staff on site delegation logs

| City           | Care_Site                            | Person_Name                | Site_PI |
|----------------|--------------------------------------|----------------------------|---------|
| ~              | ~                                    | Hayley Pearson             |         |
| ~              | ~                                    | Karen Pearson              |         |
| ~              | ~                                    | Prakash Ramachandra        |         |
| ~              | ~                                    | Ellen Shirley              |         |
| ~              | ~                                    | Lucy Smith                 |         |
| ~              | ~                                    | Sara Smith                 |         |
| ~              | ~                                    | Lucie Smith (nee Williams) |         |
| ~              | ~                                    | Anna Summerfield           |         |
| ~              | ~                                    | Syed Tirmazy               |         |
| ~              | ~                                    | Ellie Traverse             |         |
| ~              | ~                                    | Angela Watts               |         |
| ~              | ~                                    | Abel Zachariah             |         |
| Dundee, UK     | Ninewells Hospital                   | Sangeetha Ponnusamy        |         |
| Durham, UK     | University Hospital of North Durham  | Jean Dent                  |         |
| ~              | ~                                    | Julie Elliot               |         |
| ~              | ~                                    | Julie Elliott              |         |
| ~              | ~                                    | Jeanette Maughan           |         |
| ~              | ~                                    | Rhona McMenemin            |         |
| ~              | ~                                    | Lorna Morgan               |         |
| ~              | ~                                    | Andrew Parker              |         |
| ~              | ~                                    | Dorothy Turnbull           |         |
| ~              | ~                                    | Sarah Welsh                |         |
| Eastbourne, UK | Eastbourne District General Hospital | Caroline Manetta           | PI      |
| ~              | ~                                    | Shelley Baumber            |         |
| ~              | ~                                    | Theresa Baumber            |         |
| ~              | ~                                    | Duncan Gilbert             |         |
| ~              | ~                                    | Prudence Hobbs             |         |
| ~              | ~                                    | Joanna Howard              |         |
| ~              | ~                                    | Kay Jones-Skipper          |         |
| ~              | ~                                    | William Lawrence           |         |
| ~              | ~                                    | Lauren McCrisken           |         |
| ~              | ~                                    | Fiona McKinna              |         |
| ~              | ~                                    | Peter Rimington            |         |



## INVESTIGATORS AND COLLABORATORS: SITE STAFF

Staff on site delegation logs

| City          | Care_Site                | Person_Name       | Site_PI |
|---------------|--------------------------|-------------------|---------|
| ~             | ~                        | Neville Sharma    |         |
| ~             | ~                        | David Sharp       |         |
| ~             | ~                        | Aspasia Soultati  |         |
| ~             | ~                        | Graham Watson     |         |
| ~             | ~                        | Mark Whitfield    |         |
| Edinburgh, UK | Western General Hospital | Duncan McLaren    | PI      |
| ~             | ~                        | Alistair Law      | Co-I    |
| ~             | ~                        | Jahangeer Malik   | Co-I    |
| ~             | ~                        | Richard Allan     |         |
| ~             | ~                        | Claire Arthur     |         |
| ~             | ~                        | Jennifer Baxter   |         |
| ~             | ~                        | Prasad Bollina    |         |
| ~             | ~                        | Tracy Brear       |         |
| ~             | ~                        | Ewan Brown        |         |
| ~             | ~                        | Caroline Bruce    |         |
| ~             | ~                        | Alison Clark      |         |
| ~             | ~                        | Ann Cochrane      |         |
| ~             | ~                        | Heather Dalrymple |         |
| ~             | ~                        | Martin Doak       |         |
| ~             | ~                        | Roland Donat      |         |
| ~             | ~                        | Lisa Egan         |         |
| ~             | ~                        | Ben Elliott       |         |
| ~             | ~                        | Olvsola Faluyi    |         |
| ~             | ~                        | Susan Forman      |         |
| ~             | ~                        | Fiona Gardiner    |         |
| ~             | ~                        | Nikki Gilluley    |         |
| ~             | ~                        | Lynn Ho           |         |
| ~             | ~                        | Grahame Howard    |         |
| ~             | ~                        | Heather Howie     |         |
| ~             | ~                        | David Jeffrey     |         |
| ~             | ~                        | Emma Lewis        |         |
| ~             | ~                        | Ailsa Liddle      |         |
| ~             | ~                        | Hannah Lord       |         |

## INVESTIGATORS AND COLLABORATORS: SITE STAFF

Staff on site delegation logs

| City         | Care_Site                | Person_Name           | Site_PI |
|--------------|--------------------------|-----------------------|---------|
| ~            | ~                        | Sanjana Masinghe      |         |
| ~            | ~                        | Barbara Mayne         |         |
| ~            | ~                        | John McGrane          |         |
| ~            | ~                        | Alison McKinlay       |         |
| ~            | ~                        | Alan McNeill          |         |
| ~            | ~                        | Heather McVicars      |         |
| ~            | ~                        | Hazel Milligan        |         |
| ~            | ~                        | Beverley Mitchell     |         |
| ~            | ~                        | Kirsty Peebles        |         |
| ~            | ~                        | Lois Pollock          |         |
| ~            | ~                        | Brian Rogers          |         |
| ~            | ~                        | Fionagh Ross          |         |
| ~            | ~                        | Theresa Savage        |         |
| ~            | ~                        | Andrea Stanton        |         |
| ~            | ~                        | Mark Stares           |         |
| ~            | ~                        | Sarah Thompson        |         |
| ~            | ~                        | David Tulloch         |         |
| ~            | ~                        | Vivienne Wilson       |         |
| ~            | ~                        | Katie Wood            |         |
| ~            | ~                        | Catherine Woods       |         |
| Edmonton, UK | North Middlesex Hospital | Nishi Gupta           | PI      |
| ~            | ~                        | Chris Abbott          |         |
| ~            | ~                        | Beatrice Balachandran |         |
| ~            | ~                        | Girish Bhome          |         |
| ~            | ~                        | Debbie Blois          |         |
| ~            | ~                        | Tom Caumont           |         |
| ~            | ~                        | Bernadette Collins    |         |
| ~            | ~                        | Judy Hill             |         |
| ~            | ~                        | Lorraine Hurl         |         |
| ~            | ~                        | Stephen Karp          |         |
| ~            | ~                        | Ursula McGovern       |         |
| ~            | ~                        | Lucinda Melcher       |         |
| ~            | ~                        | Farhad Neave          |         |

## INVESTIGATORS AND COLLABORATORS: SITE STAFF

Staff on site delegation logs

| City       | Care_Site                       | Person_Name             | Site_PI |
|------------|---------------------------------|-------------------------|---------|
| ~          | ~                               | Jackie Newby            |         |
| ~          | ~                               | Kathy O'Farrell         |         |
| ~          | ~                               | Asim Ray                |         |
| ~          | ~                               | Kerri Rees              |         |
| ~          | ~                               | Mausam Singhera         |         |
| ~          | ~                               | Ferrial Syed            |         |
| ~          | ~                               | Anna Thompson           |         |
| ~          | ~                               | Chloe Van Someren       |         |
| Exeter, UK | Royal Devon and Exeter Hospital | Denise Sheehan          | PI      |
| ~          | ~                               | San Aung                | Co-I    |
| ~          | ~                               | Rajaguru Srinivasan     | Co-I    |
| ~          | ~                               | Peter Stephens          | Co-I    |
| ~          | ~                               | John Anderson           |         |
| ~          | ~                               | Alison Augstburger      |         |
| ~          | ~                               | Kizzy Baines            |         |
| ~          | ~                               | Alan Betts              |         |
| ~          | ~                               | David Jonathan Chambers |         |
| ~          | ~                               | Tamika Chapter          |         |
| ~          | ~                               | Ross Curwen             |         |
| ~          | ~                               | Susan Davenport         |         |
| ~          | ~                               | Elizabeth Davey         |         |
| ~          | ~                               | Melissa Davey           |         |
| ~          | ~                               | Susan Downer            |         |
| ~          | ~                               | Dawn Edwards            |         |
| ~          | ~                               | Stephanie Ann Ellis     |         |
| ~          | ~                               | Victoria Ford           |         |
| ~          | ~                               | Tracey Foss             |         |
| ~          | ~                               | Emma Guerin             |         |
| ~          | ~                               | Anne Hong               |         |
| ~          | ~                               | Frances Hood            |         |
| ~          | ~                               | Beverley Kemp           |         |
| ~          | ~                               | Theresa Lawless         |         |
| ~          | ~                               | James Leavy             |         |

## INVESTIGATORS AND COLLABORATORS: SITE STAFF

Staff on site delegation logs

| City           | Care_Site                | Person_Name              | Site_PI |
|----------------|--------------------------|--------------------------|---------|
| ~              | ~                        | Christoph Lohan          |         |
| ~              | ~                        | Anna Lydon               |         |
| ~              | ~                        | Lyndel Moore             |         |
| ~              | ~                        | Ayman Nassar             |         |
| ~              | ~                        | Tim Norris               |         |
| ~              | ~                        | Kate O'Connor            |         |
| ~              | ~                        | Jane Piper               |         |
| ~              | ~                        | Claire Ridler            |         |
| ~              | ~                        | Alison Roantree          |         |
| ~              | ~                        | Emma Robjohns            |         |
| ~              | ~                        | Ingrid Seath             |         |
| ~              | ~                        | Suzy Tasker              |         |
| ~              | ~                        | Shirley Todd             |         |
| ~              | ~                        | Elizabeth Toy            |         |
| ~              | ~                        | Matt Trivett             |         |
| ~              | ~                        | Elaine Vandcandelaere    |         |
| ~              | ~                        | Fiona Walters (nee Hall) |         |
| ~              | ~                        | Sophie Warren            |         |
| ~              | ~                        | Claire Webb              |         |
| Gillingham, UK | Medway Maritime Hospital | Stergios Boussios        | PI      |
| ~              | ~                        | Henry Taylor             | Ex-PI   |
| ~              | ~                        | Charlotte Abson          | Co-I    |
| ~              | ~                        | Christos Mikropoulos     | Co-I    |
| ~              | ~                        | Khalid Abdalla           |         |
| ~              | ~                        | Philip Adeniran          |         |
| ~              | ~                        | Diletta Bianchini        |         |
| ~              | ~                        | Louise Black             |         |
| ~              | ~                        | Corinne Borley           |         |
| ~              | ~                        | Louise Brassington       |         |
| ~              | ~                        | Deirdre Cooke            |         |
| ~              | ~                        | Parool Darbar            |         |
| ~              | ~                        | Charles Davis            |         |
| ~              | ~                        | Tamara Diamond           |         |

## INVESTIGATORS AND COLLABORATORS: SITE STAFF

Staff on site delegation logs

| City        | Care_Site                              | Person_Name            | Site_PI |
|-------------|----------------------------------------|------------------------|---------|
| ~           | ~                                      | Mary Everett           |         |
| ~           | ~                                      | Durga Maya Gurung      |         |
| ~           | ~                                      | Marie Louise Hollands  |         |
| ~           | ~                                      | Kay Jones              |         |
| ~           | ~                                      | Afroditi Karathanasi   |         |
| ~           | ~                                      | Tessa Lawrence         |         |
| ~           | ~                                      | Carol Mayger           |         |
| ~           | ~                                      | Peter Milverton        |         |
| ~           | ~                                      | Kevin Naicker          |         |
| ~           | ~                                      | Elizabeth Newman-Horne |         |
| ~           | ~                                      | Lisa Parker            |         |
| ~           | ~                                      | Suzie Reyner           |         |
| ~           | ~                                      | Alison Richards        |         |
| ~           | ~                                      | Agne Sadauskaite       |         |
| ~           | ~                                      | James Sawyer           |         |
| ~           | ~                                      | Jodie Seymour          |         |
| ~           | ~                                      | Nicola Southwell       |         |
| ~           | ~                                      | Emma Sutton            |         |
| ~           | ~                                      | Swapna Thomas          |         |
| ~           | ~                                      | Richard Thornton       |         |
| ~           | ~                                      | Alba Tuban             |         |
| ~           | ~                                      | Katarzyna Urbanczyk    |         |
| ~           | ~                                      | Gayzel Vallejera       |         |
| ~           | ~                                      | Simon Wan              |         |
| Glasgow, UK | Beatson West of Scotland Cancer Centre | Rob Jones              | PI      |
| ~           | ~                                      | John Graham            | Ex-PI   |
| ~           | ~                                      | Kathryn Banfill        | Co-I    |
| ~           | ~                                      | Derek Grose            | Co-I    |
| ~           | ~                                      | Carolynn Lamb          | Co-I    |
| ~           | ~                                      | Tareq Abdullah         |         |
| ~           | ~                                      | Abdulla Al-hasso       |         |
| ~           | ~                                      | Mohammed Alfayez       |         |
| ~           | ~                                      | Jawaher Ansari         |         |

## INVESTIGATORS AND COLLABORATORS: SITE STAFF

Staff on site delegation logs

| City | Care_Site | Person_Name            | Site_PI |
|------|-----------|------------------------|---------|
| ~    | ~         | Miranda Ashton         |         |
| ~    | ~         | Patricia Baird         |         |
| ~    | ~         | Martin Ball            |         |
| ~    | ~         | Gillian Barmack        |         |
| ~    | ~         | Sophie Barrett         |         |
| ~    | ~         | Lorraine Barwell       |         |
| ~    | ~         | Karen Bell             |         |
| ~    | ~         | Jenny Brown            |         |
| ~    | ~         | Louise Bruce           |         |
| ~    | ~         | Nicola Cairns          |         |
| ~    | ~         | Ross Carruthers        |         |
| ~    | ~         | Almudena Cascales      |         |
| ~    | ~         | Annette Charlick       |         |
| ~    | ~         | Maureen Connolly       |         |
| ~    | ~         | Catriona Cowan         |         |
| ~    | ~         | Alice Coy              |         |
| ~    | ~         | Cicely Cunningham      |         |
| ~    | ~         | Judith Dixon           |         |
| ~    | ~         | David Dodds            |         |
| ~    | ~         | Gerard Forrest         |         |
| ~    | ~         | Ben Fulton             |         |
| ~    | ~         | Katie Galbraith        |         |
| ~    | ~         | Hilary Glen            |         |
| ~    | ~         | Jacqueline Gourlay     |         |
| ~    | ~         | Jan Graham             |         |
| ~    | ~         | Janet Graham           |         |
| ~    | ~         | Kathryn Graham         |         |
| ~    | ~         | Lynne Grieve           |         |
| ~    | ~         | Ailsa Griffen          |         |
| ~    | ~         | Sally Hall             |         |
| ~    | ~         | Maureen Hamill         |         |
| ~    | ~         | Maryon Hardie          |         |
| ~    | ~         | Paula Henry-Stephenson |         |

## INVESTIGATORS AND COLLABORATORS: SITE STAFF

Staff on site delegation logs

| City | Care_Site | Person_Name                  | Site_PI |
|------|-----------|------------------------------|---------|
| ~    | ~         | Awris Jalil                  |         |
| ~    | ~         | Sai Juan Jia                 |         |
| ~    | ~         | Gemma Johnson                |         |
| ~    | ~         | Saranya Kakumanu             |         |
| ~    | ~         | Ashleigh Kerr                |         |
| ~    | ~         | Esfandiyar Khan              |         |
| ~    | ~         | Kirsten Laws (nee Borthwick) |         |
| ~    | ~         | Graeme Lumsden               |         |
| ~    | ~         | Antonia MacMillan            |         |
| ~    | ~         | Nicholas Macleod             |         |
| ~    | ~         | Rana Mahmood                 |         |
| ~    | ~         | Husam Marashi                |         |
| ~    | ~         | Brendan McCann               |         |
| ~    | ~         | Stephen McKay                |         |
| ~    | ~         | Fiona McQueen                |         |
| ~    | ~         | Rebecca Muirhead             |         |
| ~    | ~         | Maria Nicol                  |         |
| ~    | ~         | Stefan Nowicki               |         |
| ~    | ~         | Ruth Orr                     |         |
| ~    | ~         | Aqilah Othman                |         |
| ~    | ~         | Jennifer Petrie              |         |
| ~    | ~         | Linzi Rae                    |         |
| ~    | ~         | Nathan Richardson            |         |
| ~    | ~         | Patricia Roxburgh            |         |
| ~    | ~         | Martin Russell               |         |
| ~    | ~         | Azmat Sadozye                |         |
| ~    | ~         | Ian Sanders                  |         |
| ~    | ~         | Norma Sidek                  |         |
| ~    | ~         | Claire Steele                |         |
| ~    | ~         | Kirsteen Stuart              |         |
| ~    | ~         | Diann Taggart                |         |
| ~    | ~         | Lye Mun Tho                  |         |
| ~    | ~         | Aisha Tufail                 |         |

## INVESTIGATORS AND COLLABORATORS: SITE STAFF

Staff on site delegation logs

| City           | Care_Site                      | Person_Name        | Site_PI |
|----------------|--------------------------------|--------------------|---------|
| ~              | ~                              | Balaji Venugopal   |         |
| ~              | ~                              | Jan Wallace        |         |
| ~              | ~                              | Hannah Weir        |         |
| ~              | ~                              | Christina Wilson   |         |
| Gloucester, UK | Gloucestershire Royal Hospital | Jo Bowen           | PI      |
| ~              | ~                              | Peter Jenkins      | Co-I    |
| ~              | ~                              | Julie Allen        |         |
| ~              | ~                              | Charlotte Ayrton   |         |
| ~              | ~                              | Sarah Beazer       |         |
| ~              | ~                              | Victoria Bell      |         |
| ~              | ~                              | Bethan Cartwright  |         |
| ~              | ~                              | Audrey Cook        |         |
| ~              | ~                              | Samuel Croly       |         |
| ~              | ~                              | Lin Crossley       |         |
| ~              | ~                              | Chris Ford         |         |
| ~              | ~                              | Janet Forkes       |         |
| ~              | ~                              | Julia Hall         |         |
| ~              | ~                              | Sai Jonnada        |         |
| ~              | ~                              | Laura Malins       |         |
| ~              | ~                              | Sarah Matthews     |         |
| ~              | ~                              | Louise Moore       |         |
| ~              | ~                              | Roger Owen         |         |
| ~              | ~                              | Elisabeth Read     |         |
| ~              | ~                              | Claire Salter      |         |
| ~              | ~                              | Rachel Sayers      |         |
| ~              | ~                              | Elaine Sizer       |         |
| ~              | ~                              | Amy Skelton        |         |
| ~              | ~                              | Sarah Stanley      |         |
| ~              | ~                              | Abi Stuart         |         |
| ~              | ~                              | Kate Trigg-Hogarth |         |
| ~              | ~                              | Richard Wallis     |         |
| ~              | ~                              | Sue Wronski        |         |
| Guildford, UK  | Royal Surrey County Hospital   | Carla Perna        | PI      |



## INVESTIGATORS AND COLLABORATORS: SITE STAFF

Staff on site delegation logs

| City | Care_Site | Person_Name            | Site_PI |
|------|-----------|------------------------|---------|
| ~    | ~         | Leslie Cheng           | Co-I    |
| ~    | ~         | Mahwish Karim          | Co-I    |
| ~    | ~         | Richmond Abeseabe      |         |
| ~    | ~         | Kavita Bhat            |         |
| ~    | ~         | Caterina Bissa         |         |
| ~    | ~         | Melanie Boafo-Yirenkyi |         |
| ~    | ~         | Fiona Butler           |         |
| ~    | ~         | Marianne Dabbs         |         |
| ~    | ~         | Veronica Davis         |         |
| ~    | ~         | Sarah De Swert         |         |
| ~    | ~         | Maria Drzymala         |         |
| ~    | ~         | Daisy Floyd            |         |
| ~    | ~         | Teresa Guerrero-Urbano |         |
| ~    | ~         | Lesley Harden          |         |
| ~    | ~         | Celia Harris           |         |
| ~    | ~         | Imogen Heenan          |         |
| ~    | ~         | Adele Hugg             |         |
| ~    | ~         | Stephy Joseph          |         |
| ~    | ~         | Jen Julius             |         |
| ~    | ~         | Teresa Keating         |         |
| ~    | ~         | Sara Khaksar           |         |
| ~    | ~         | Zephyrine King         |         |
| ~    | ~         | Robert Laing           |         |
| ~    | ~         | Emmanuel Larbi         |         |
| ~    | ~         | James Lowe             |         |
| ~    | ~         | Catherine Medcalf      |         |
| ~    | ~         | Julian Money-Kyrle     |         |
| ~    | ~         | Mahomed Moosa          |         |
| ~    | ~         | Angela Morgan          |         |
| ~    | ~         | Linda Nardone          |         |
| ~    | ~         | Kathrin Narvaez-Vega   |         |
| ~    | ~         | Jenny Nobes            |         |
| ~    | ~         | Kate Penhaligon        |         |

## INVESTIGATORS AND COLLABORATORS: SITE STAFF

Staff on site delegation logs

| City       | Care_Site                            | Person_Name       | Site_PI |
|------------|--------------------------------------|-------------------|---------|
| ~          | ~                                    | Nick Pilkington   |         |
| ~          | ~                                    | Sue Sargent       |         |
| ~          | ~                                    | Richard Shaffer   |         |
| ~          | ~                                    | Charlotte Shelley |         |
| ~          | ~                                    | Frances Sidi      |         |
| ~          | ~                                    | Joanna Stokoe     |         |
| ~          | ~                                    | Sree Susaria      |         |
| ~          | ~                                    | Miriam White      |         |
| ~          | ~                                    | Julia Whittle     |         |
| ~          | ~                                    | Katie Wood        |         |
| ~          | ~                                    | Jane Woods        |         |
| Harlow, UK | Princess Alexandra Hospital (Harlow) | Lucinda Melcher   | PI      |
| ~          | ~                                    | Tasia Aghadiuno   | Co-I    |
| ~          | ~                                    | Nishi Gupta       | Co-I    |
| ~          | ~                                    | Anna Lerner       | Co-I    |
| ~          | ~                                    | Hamoun Rozati     | Co-I    |
| ~          | ~                                    | Zainab Wasim      | Co-I    |
| ~          | ~                                    | Gemma Cook        |         |
| ~          | ~                                    | Amelia Daniel     |         |
| ~          | ~                                    | Reena Davda       |         |
| ~          | ~                                    | Shroma De Silva   |         |
| ~          | ~                                    | Albert Edwards    |         |
| ~          | ~                                    | Sunjalee Fernando |         |
| ~          | ~                                    | Ahmed Hnoosh      |         |
| ~          | ~                                    | Evelyn Holmes     |         |
| ~          | ~                                    | Jodie Johnson     |         |
| ~          | ~                                    | Paul Kabuubi      |         |
| ~          | ~                                    | Joanne Kellaway   |         |
| ~          | ~                                    | Amanda Lewis      |         |
| ~          | ~                                    | Amy Lewis         |         |
| ~          | ~                                    | Teresa Light      |         |
| ~          | ~                                    | Cait Rees         |         |
| ~          | ~                                    | Ervin Shpuza      |         |

## INVESTIGATORS AND COLLABORATORS: SITE STAFF

Staff on site delegation logs

| City               | Care_Site                  | Person_Name               | Site_PI |
|--------------------|----------------------------|---------------------------|---------|
| ~                  | ~                          | Tracey White              |         |
| ~                  | ~                          | Nikki White (nee Staines) |         |
| Haverford West, UK | Withybush General Hospital | Sandra Evens              |         |
| Hereford, UK       | Hereford County Hospital   | Warren Grant              | PI      |
| ~                  | ~                          | Susan Anderson            |         |
| ~                  | ~                          | Anita Ashton              |         |
| ~                  | ~                          | Vishal Bhalla             |         |
| ~                  | ~                          | Caitlin Bowden            |         |
| ~                  | ~                          | Sophie Boyd               |         |
| ~                  | ~                          | Sophie Boyd (nee Evans)   |         |
| ~                  | ~                          | Serrafina Carini          |         |
| ~                  | ~                          | Jagdish Chana             |         |
| ~                  | ~                          | Audrey Cook               |         |
| ~                  | ~                          | Sophie Cooper             |         |
| ~                  | ~                          | Melanie Evans             |         |
| ~                  | ~                          | Maxine Flubacher          |         |
| ~                  | ~                          | Janet Forkes              |         |
| ~                  | ~                          | Kate Hammerton            |         |
| ~                  | ~                          | Andy Hedges               |         |
| ~                  | ~                          | Gill Horsfield            |         |
| ~                  | ~                          | Jenny Howls               |         |
| ~                  | ~                          | Claire Hughes             |         |
| ~                  | ~                          | Janine Jones (Birch)      |         |
| ~                  | ~                          | Lisa King                 |         |
| ~                  | ~                          | Laura Lees                |         |
| ~                  | ~                          | Rachel Lowe               |         |
| ~                  | ~                          | Linda Moseley             |         |
| ~                  | ~                          | Naeem Musani              |         |
| ~                  | ~                          | Jolanta Pueskacz          |         |
| ~                  | ~                          | Catherine Reed            |         |
| ~                  | ~                          | Nina Reeve                |         |
| ~                  | ~                          | Zara Roberts              |         |
| ~                  | ~                          | Timothy Spencer           |         |

## INVESTIGATORS AND COLLABORATORS: SITE STAFF

Staff on site delegation logs

| City             | Care_Site        | Person_Name        | Site_PI |
|------------------|------------------|--------------------|---------|
| ~                | ~                | David Stow         |         |
| ~                | ~                | Duncan Stow        |         |
| ~                | ~                | Harriet Taylor     |         |
| ~                | ~                | June Thomas        |         |
| ~                | ~                | Stacey Turner      |         |
| ~                | ~                | Cara Watson        |         |
| ~                | ~                | Terry Watson       |         |
| ~                | ~                | Bethany Wellington |         |
| ~                | ~                | Nicola Williamson  |         |
| High Wycombe, UK | Wycombe Hospital | Katherine Hyde     | PI      |
| ~                | ~                | Ami Sabharwal      | Ex-PI   |
| ~                | ~                | Gerard Andrade     | Co-I    |
| ~                | ~                | Philip Camilleri   | Co-I    |
| ~                | ~                | Prabir Chakraborti | Co-I    |
| ~                | ~                | Sean O'Cathail     | Co-I    |
| ~                | ~                | Thinn Pwint        | Co-I    |
| ~                | ~                | Maggie Aldersley   |         |
| ~                | ~                | Bhavna Badiani     |         |
| ~                | ~                | Jasvinder Bains    |         |
| ~                | ~                | Amarjit Bdesha     |         |
| ~                | ~                | Ans-Mari Bester    |         |
| ~                | ~                | Nicola Bowers      |         |
| ~                | ~                | Chrissie Butcher   |         |
| ~                | ~                | Janice Carpenter   |         |
| ~                | ~                | Penny Carter       |         |
| ~                | ~                | Evelyn Chan        |         |
| ~                | ~                | Tiffany Chan       |         |
| ~                | ~                | Christine Collins  |         |
| ~                | ~                | Anita Cserbane     |         |
| ~                | ~                | Benjamin Fairfax   |         |
| ~                | ~                | Claire Fernandez   |         |
| ~                | ~                | Siobhan Gettings   |         |
| ~                | ~                | Avinash Gupta      |         |

## INVESTIGATORS AND COLLABORATORS: SITE STAFF

Staff on site delegation logs

| City             | Care_Site                    | Person_Name             | Site_PI |
|------------------|------------------------------|-------------------------|---------|
| ~                | ~                            | Neil Haldar             |         |
| ~                | ~                            | Kathryn Herbert         |         |
| ~                | ~                            | Emma Hogbin             |         |
| ~                | ~                            | Manisha Joshi           |         |
| ~                | ~                            | Roisin Kavanagh         |         |
| ~                | ~                            | John Patrick Kelleher   |         |
| ~                | ~                            | Rahul Kurup             |         |
| ~                | ~                            | Erica Lieberman         |         |
| ~                | ~                            | Rossana Mancinelli      |         |
| ~                | ~                            | Sarah Manyangadze       |         |
| ~                | ~                            | Moncy Mathew            |         |
| ~                | ~                            | Susan McLain-Smith      |         |
| ~                | ~                            | Vivek Mohan             |         |
| ~                | ~                            | Aruna Nair              |         |
| ~                | ~                            | Alice Ngumo             |         |
| ~                | ~                            | Ileana Nguyen           |         |
| ~                | ~                            | Catherine Northey       |         |
| ~                | ~                            | Niki Panakis            |         |
| ~                | ~                            | Andrew Protheroe        |         |
| ~                | ~                            | Wasiru Saka             |         |
| ~                | ~                            | Tracey Stammers         |         |
| ~                | ~                            | Helena Stone            |         |
| ~                | ~                            | Michelle Taylor-Siddons |         |
| ~                | ~                            | Samantha Thomas         |         |
| ~                | ~                            | Sally Trent             |         |
| ~                | ~                            | Neil Trew-Smith         |         |
| ~                | ~                            | Gail Varley             |         |
| ~                | ~                            | Janet Weir              |         |
| ~                | ~                            | Hazel Wynn              |         |
| Huddersfield, UK | Huddersfield Royal Infirmary | Uschi Hofmann           | PI      |
| ~                | ~                            | Nicolas Bryan           | Co-I    |
| ~                | ~                            | Lucy Jones              | Co-I    |
| ~                | ~                            | Deivasikamani Ramanujam | Co-I    |

## INVESTIGATORS AND COLLABORATORS: SITE STAFF

Staff on site delegation logs

| City | Care_Site | Person_Name         | Site_PI |
|------|-----------|---------------------|---------|
| ~    | ~         | Samantha Turnbull   | Co-I    |
| ~    | ~         | Mohammad Irfan Alam |         |
| ~    | ~         | Karen Bicknell      |         |
| ~    | ~         | Barbara Crosse      |         |
| ~    | ~         | Nicky Daker         |         |
| ~    | ~         | Stacey Freeth       |         |
| ~    | ~         | Lisa Gledhill       |         |
| ~    | ~         | Paula Gomes         |         |
| ~    | ~         | Lindsay Greenhalgh  |         |
| ~    | ~         | Denise Hancock      |         |
| ~    | ~         | Jane Hook           |         |
| ~    | ~         | Ibrar Hussain       |         |
| ~    | ~         | Hayley Inman        |         |
| ~    | ~         | Diane Kelly         |         |
| ~    | ~         | Mandy Madigan       |         |
| ~    | ~         | Lear Matapure       |         |
| ~    | ~         | Adam Mawer          |         |
| ~    | ~         | Belinda McLean      |         |
| ~    | ~         | Julie Millward      |         |
| ~    | ~         | Naledi Mzwimbi      |         |
| ~    | ~         | Monica Narasimham   |         |
| ~    | ~         | Rachel Parker       |         |
| ~    | ~         | Melanie Quesne      |         |
| ~    | ~         | Hannah Riley        |         |
| ~    | ~         | Kully Sandhu        |         |
| ~    | ~         | Lisa Shaw           |         |
| ~    | ~         | Kathryn Smith       |         |
| ~    | ~         | Katherine Tighe     |         |
| ~    | ~         | Christine Turner    |         |
| ~    | ~         | Rob Turner          |         |
| ~    | ~         | Miranda Usher       |         |
| ~    | ~         | Hayley Webster      |         |
| ~    | ~         | Tracy Wood          |         |

## INVESTIGATORS AND COLLABORATORS: SITE STAFF

Staff on site delegation logs

| City          | Care_Site                      | Person_Name          | Site_PI |
|---------------|--------------------------------|----------------------|---------|
| ~             | ~                              | Emma Woodward        |         |
| ~             | ~                              | Sharon Woolley       |         |
| Hull, UK      | Princess Royal Hospital (Hull) | Robert Dealey        | Ex-PI   |
| ~             | ~                              | Emma Bertram         |         |
| ~             | ~                              | Suzy Bunton          |         |
| ~             | ~                              | Christopher Hamilton |         |
| ~             | ~                              | Linda Hoggarth       |         |
| ~             | ~                              | Claire Levesley      |         |
| ~             | ~                              | Sarah Moffat         |         |
| Inverness, UK | Raigmore Hospital              | Neil McPhail         | PI      |
| ~             | ~                              | Anglise Addison      |         |
| ~             | ~                              | Florence Anderson    |         |
| ~             | ~                              | Seonaid Arnott       |         |
| ~             | ~                              | Susan Bain           |         |
| ~             | ~                              | Sudhir Borgaonkar    |         |
| ~             | ~                              | Sandra Brown         |         |
| ~             | ~                              | Karen Callum         |         |
| ~             | ~                              | Audrey Campbell      |         |
| ~             | ~                              | Denise Campbell      |         |
| ~             | ~                              | Fiona Campbell       |         |
| ~             | ~                              | Jane Campbell        |         |
| ~             | ~                              | Margaret Chisholm    |         |
| ~             | ~                              | Kay Kelly            |         |
| ~             | ~                              | Charles Kodikara     |         |
| ~             | ~                              | Michael Loynd        |         |
| ~             | ~                              | Alison Macdonald     |         |
| ~             | ~                              | Angela Macgregor     |         |
| ~             | ~                              | Carol Macgregor      |         |
| ~             | ~                              | Rachel Mackay        |         |
| ~             | ~                              | Laura Maclennan      |         |
| ~             | ~                              | Jude Madeleine       |         |
| ~             | ~                              | Melanie McIlroy      |         |
| ~             | ~                              | Mary McKenzie        |         |

## INVESTIGATORS AND COLLABORATORS: SITE STAFF

Staff on site delegation logs

| City        | Care_Site        | Person_Name               | Site_PI |
|-------------|------------------|---------------------------|---------|
| ~           | ~                | Karina McQuiston          |         |
| ~           | ~                | Catriona Morrison         |         |
| ~           | ~                | Sean Neville              |         |
| ~           | ~                | Alison Nicholls           |         |
| ~           | ~                | Steve Nicholson           |         |
| ~           | ~                | Aristoula Papakostidi     |         |
| ~           | ~                | Marion Paterson           |         |
| ~           | ~                | Anne Marie Pollock        |         |
| ~           | ~                | Martin Russell            |         |
| ~           | ~                | Azmat Sadozye             |         |
| ~           | ~                | Ian Shread                |         |
| ~           | ~                | Georgina Simpson          |         |
| ~           | ~                | Glenda Sinclair           |         |
| ~           | ~                | Jane Sinclair             |         |
| ~           | ~                | Anna Skene                |         |
| ~           | ~                | Joan Stewart              |         |
| ~           | ~                | Una Taylor                |         |
| ~           | ~                | Zoe Urquhart              |         |
| ~           | ~                | David Whillis             |         |
| Ipswich, UK | Ipswich Hospital | Robert Brierly            | PI      |
| ~           | ~                | William Ine               | Co-I    |
| ~           | ~                | TJ Podd                   | Co-I    |
| ~           | ~                | Deborah Abrams            |         |
| ~           | ~                | Debbie Austin             |         |
| ~           | ~                | Gautam Banerjee           |         |
| ~           | ~                | Sheen Cherian             |         |
| ~           | ~                | Jennifer Collins          |         |
| ~           | ~                | Peter Donaldson           |         |
| ~           | ~                | Charlotte Etheridge       |         |
| ~           | ~                | Ian Floodgate             |         |
| ~           | ~                | Mohsen Habib              |         |
| ~           | ~                | Adiba Hoodbhoy            |         |
| ~           | ~                | Kerry Howlett (nee Brown) |         |



## INVESTIGATORS AND COLLABORATORS: SITE STAFF

Staff on site delegation logs

| City         | Care_Site                 | Person_Name               | Site_PI |
|--------------|---------------------------|---------------------------|---------|
| ~            | ~                         | Sonia Kerridge            |         |
| ~            | ~                         | Natalie Lloyd             |         |
| ~            | ~                         | Matt Mendoza              |         |
| ~            | ~                         | John Parry                |         |
| ~            | ~                         | Paul Ridley               |         |
| ~            | ~                         | Mandy Riley (nee Evans)   |         |
| ~            | ~                         | Chris Rose                |         |
| ~            | ~                         | Christopher Scrase        |         |
| ~            | ~                         | Julie Simpson             |         |
| ~            | ~                         | Julie Spurgeon            |         |
| ~            | ~                         | Sarah Treece              |         |
| ~            | ~                         | Yvonne Tricker            |         |
| ~            | ~                         | Susan Upson               |         |
| ~            | ~                         | Ramachandran Venkitaraman |         |
| ~            | ~                         | Joe Wells                 |         |
| ~            | ~                         | Angharad Williams         |         |
| ~            | ~                         | Jo Woor                   |         |
| Keighley, UK | Airedale General Hospital | Simon Brown               | PI      |
| ~            | ~                         | Sohail Mughal             | Co-I    |
| ~            | ~                         | Hayley Bates              |         |
| ~            | ~                         | Louise Binns              |         |
| ~            | ~                         | Carl Booth                |         |
| ~            | ~                         | Lisa Bullough             |         |
| ~            | ~                         | Nathalie Casanova         |         |
| ~            | ~                         | Sue Cheeseman             |         |
| ~            | ~                         | Katy Clarke               |         |
| ~            | ~                         | Michael Crawford          |         |
| ~            | ~                         | Gillian Darnbrook         |         |
| ~            | ~                         | Fiona Farquhar            |         |
| ~            | ~                         | Andrew Gash               |         |
| ~            | ~                         | Jasmine Hartley           |         |
| ~            | ~                         | Ann Henry                 |         |
| ~            | ~                         | Helen Henson              |         |

## INVESTIGATORS AND COLLABORATORS: SITE STAFF

Staff on site delegation logs

| City              | Care_Site                      | Person_Name          | Site_PI |
|-------------------|--------------------------------|----------------------|---------|
| ~                 | ~                              | Pip Hill             |         |
| ~                 | ~                              | Ganesan Jeyasangar   |         |
| ~                 | ~                              | Ruth Johnson         |         |
| ~                 | ~                              | Rachel Kennedy       |         |
| ~                 | ~                              | Dan Lee              |         |
| ~                 | ~                              | Judy McAlister       |         |
| ~                 | ~                              | Sharron Parkinson    |         |
| ~                 | ~                              | Amy Pendrill         |         |
| ~                 | ~                              | Joseph Quinn         |         |
| ~                 | ~                              | Charlotte Richardson |         |
| ~                 | ~                              | Satti Saggi          |         |
| ~                 | ~                              | Clara Sentamans      |         |
| ~                 | ~                              | Alison Shaw          |         |
| ~                 | ~                              | Liz Shenton          |         |
| ~                 | ~                              | Josie Snell          |         |
| ~                 | ~                              | Mandy Swanepoel      |         |
| ~                 | ~                              | Alison Swindells     |         |
| Kidderminster, UK | Kidderminster General Hospital | Lisa Capaldi         | PI      |
| ~                 | ~                              | Kirsty Clarke        | Co-I    |
| ~                 | ~                              | Paul Flinders        | Co-I    |
| ~                 | ~                              | Ayyaz Munawar        | Co-I    |
| ~                 | ~                              | Shaikh Rana          | Co-I    |
| ~                 | ~                              | Mark Churn           |         |
| ~                 | ~                              | Kate Field           |         |
| ~                 | ~                              | Monica Gauntlett     |         |
| ~                 | ~                              | Linda Higgins        |         |
| ~                 | ~                              | Hayley Hodson        |         |
| ~                 | ~                              | M Habib Khan         |         |
| ~                 | ~                              | Emma Marshall        |         |
| ~                 | ~                              | Hugh Morrow          |         |
| ~                 | ~                              | Sarah Moss           |         |
| ~                 | ~                              | Zeeshaan Parvez      |         |
| ~                 | ~                              | Patricia Rimell      |         |

## INVESTIGATORS AND COLLABORATORS: SITE STAFF

Staff on site delegation logs

| City           | Care_Site                   | Person_Name                   | Site_PI |
|----------------|-----------------------------|-------------------------------|---------|
| ~              | ~                           | Alison Rosoman                |         |
| ~              | ~                           | Veronica Rowlands             |         |
| ~              | ~                           | Sally Stringer (pr. Davis)    |         |
| ~              | ~                           | Helen Tranter                 |         |
| ~              | ~                           | Jayne Tyler                   |         |
| ~              | ~                           | Ann White                     |         |
| ~              | ~                           | Julie Wollaston               |         |
| Kilmarnock, UK | Crosshouse Hospital         | Margaret McKernan             |         |
| Lancaster, UK  | Royal Lancaster Infirmary   | Sophie Raby                   |         |
| Larbert, UK    | Forth Valley Royal Hospital | Norma Sidek                   | PI      |
| ~              | ~                           | Saurabh Borgaonkar            |         |
| ~              | ~                           | Stephanie Brogan (nee Roddie) |         |
| ~              | ~                           | Maureen Hamill                |         |
| ~              | ~                           | Eilidh Henderson              |         |
| ~              | ~                           | Carolynn Lamb                 |         |
| ~              | ~                           | Amy Martin                    |         |
| ~              | ~                           | Stephen McKay                 |         |
| ~              | ~                           | Nadja Melquiot                |         |
| ~              | ~                           | Adam Peters                   |         |
| ~              | ~                           | Lynn Prentice                 |         |
| ~              | ~                           | Joanne Robinson               |         |
| ~              | ~                           | John Martin Russell           |         |
| ~              | ~                           | Lesley Symon                  |         |
| ~              | ~                           | Seamus Teahan                 |         |
| ~              | ~                           | Anne Todd                     |         |
| ~              | ~                           | Patricia Turner               |         |
| ~              | ~                           | Sally Young                   |         |
| ~              | ~                           | Alison Yule                   |         |
| Leeds, UK      | Cookridge Hospital          | Richard Kaplan                |         |
| ~              | ~                           | Anne Kiltie                   |         |
| ~              | ~                           | Carmel Loughrey               |         |
| Leeds, UK      | Leeds General Infirmary     | Caroline Bedford              |         |
| ~              | ~                           | Adrian Joyce                  |         |

## INVESTIGATORS AND COLLABORATORS: SITE STAFF

Staff on site delegation logs

| City      | Care_Site                            | Person_Name               | Site_PI |
|-----------|--------------------------------------|---------------------------|---------|
| Leeds, UK | St James University Hospital (Leeds) | William Cross             | PI      |
| ~         | ~                                    | Peter Whelan              | Ex-PI   |
| ~         | ~                                    | Naveen Vasudev            | Co-I    |
| ~         | ~                                    | Dolapo Ajayi              |         |
| ~         | ~                                    | Polapo Ajayi              |         |
| ~         | ~                                    | Javeria Akhtar            |         |
| ~         | ~                                    | Gemma Austin (nee Glover) |         |
| ~         | ~                                    | Caroline Bedford          |         |
| ~         | ~                                    | Ian Boon                  |         |
| ~         | ~                                    | David Bottomley           |         |
| ~         | ~                                    | Janet Brown               |         |
| ~         | ~                                    | James Cavanagh            |         |
| ~         | ~                                    | Judith Chapman            |         |
| ~         | ~                                    | John Chester              |         |
| ~         | ~                                    | Jude Clarke               |         |
| ~         | ~                                    | Anne Crossley             |         |
| ~         | ~                                    | Claire Daisey             |         |
| ~         | ~                                    | Luis Daverede             |         |
| ~         | ~                                    | Emily Davies              |         |
| ~         | ~                                    | Svetoslava Doshmanonska   |         |
| ~         | ~                                    | Judith Evans              |         |
| ~         | ~                                    | Kevin Franks              |         |
| ~         | ~                                    | Catherine Gray            |         |
| ~         | ~                                    | Maria Hall                |         |
| ~         | ~                                    | Ann Henry                 |         |
| ~         | ~                                    | Jodene Hill               |         |
| ~         | ~                                    | Liz Hudson                |         |
| ~         | ~                                    | Satinder Jagdev           |         |
| ~         | ~                                    | Sunjay Jain               |         |
| ~         | ~                                    | Joseph Joji               |         |
| ~         | ~                                    | Adrian Joyce              |         |
| ~         | ~                                    | Mercy Kaiga               |         |
| ~         | ~                                    | Richard Kaplan            |         |

## INVESTIGATORS AND COLLABORATORS: SITE STAFF

Staff on site delegation logs

| City        | Care_Site               | Person_Name                | Site_PI |
|-------------|-------------------------|----------------------------|---------|
| ~           | ~                       | Richard Khafagy            |         |
| ~           | ~                       | Anne Kiltie                |         |
| ~           | ~                       | Sanjeev Kotwal             |         |
| ~           | ~                       | Sam Lotfi                  |         |
| ~           | ~                       | Carmel Loughrey            |         |
| ~           | ~                       | Emma Lundy                 |         |
| ~           | ~                       | Jade McCann                |         |
| ~           | ~                       | Angela Morgan              |         |
| ~           | ~                       | Hima Bindu Musunuru        |         |
| ~           | ~                       | Catherine Parbutt          |         |
| ~           | ~                       | Alan Paul                  |         |
| ~           | ~                       | Helen Payne                |         |
| ~           | ~                       | Charlotte Pool             |         |
| ~           | ~                       | Stephen Prescott           |         |
| ~           | ~                       | Christy Ralph              |         |
| ~           | ~                       | Hannah Roberts             |         |
| ~           | ~                       | Sue Rodwell                |         |
| ~           | ~                       | Krishna Shastry            |         |
| ~           | ~                       | Sue Sibson                 |         |
| ~           | ~                       | Rafal Turo                 |         |
| ~           | ~                       | Hannah Wigginton           |         |
| ~           | ~                       | Christopher Williams       |         |
| ~           | ~                       | Lorraine Wiseman           |         |
| ~           | ~                       | Ruiyang Yan                |         |
| Lincoln, UK | Lincoln County Hospital | Thiagarajan Sreenivasan    | PI      |
| ~           | ~                       | Prantik Das                | Co-I    |
| ~           | ~                       | Ana Fernandez-Ots          | Co-I    |
| ~           | ~                       | Sindhu Ramarwothy          | Co-I    |
| ~           | ~                       | Alfredo Addeo              |         |
| ~           | ~                       | Simon Archer               |         |
| ~           | ~                       | Suzanne Archer             |         |
| ~           | ~                       | Christian Arias            |         |
| ~           | ~                       | David Ballesteros-Quintail |         |

## INVESTIGATORS AND COLLABORATORS: SITE STAFF

Staff on site delegation logs

| City          | Care_Site                           | Person_Name       | Site_PI |
|---------------|-------------------------------------|-------------------|---------|
| ~             | ~                                   | Giuseppe Banna    |         |
| ~             | ~                                   | Karin Baria       |         |
| ~             | ~                                   | Sarah Bell        |         |
| ~             | ~                                   | Jayne Borley      |         |
| ~             | ~                                   | Susie Butler      |         |
| ~             | ~                                   | Diane Carey       |         |
| ~             | ~                                   | Helen Carolan     |         |
| ~             | ~                                   | Sarah Coombs      |         |
| ~             | ~                                   | Olesya Francis    |         |
| ~             | ~                                   | Annette Hilldrith |         |
| ~             | ~                                   | Kathryn Hoare     |         |
| ~             | ~                                   | Kerri Johnson     |         |
| ~             | ~                                   | Andrew Judd       |         |
| ~             | ~                                   | Carol Lockwood    |         |
| ~             | ~                                   | Ray McDermott     |         |
| ~             | ~                                   | Yogesh Nishchal   |         |
| ~             | ~                                   | Maryanne Okubanjo |         |
| ~             | ~                                   | Miguel Panades    |         |
| ~             | ~                                   | Kathryn Pearson   |         |
| ~             | ~                                   | Rhiannan Pegg     |         |
| ~             | ~                                   | Gunjan Phalod     |         |
| ~             | ~                                   | Jenny Salmon      |         |
| ~             | ~                                   | Andrew Sloan      |         |
| ~             | ~                                   | Rebecca Spencer   |         |
| ~             | ~                                   | Caroline Taylor   |         |
| ~             | ~                                   | Janet Tomlinson   |         |
| ~             | ~                                   | Elena Umbrurescu  |         |
| ~             | ~                                   | Laura Walsh       |         |
| ~             | ~                                   | Alyson Wilson     |         |
| Liverpool, UK | Royal Liverpool University Hospital | Zafar Malik       | PI      |
| ~             | ~                                   | Chinnamani Eswar  | Co-I    |
| ~             | ~                                   | Nicola Bermingham |         |
| ~             | ~                                   | Lizzie Dale       |         |

## INVESTIGATORS AND COLLABORATORS: SITE STAFF

Staff on site delegation logs

| City          | Care_Site                   | Person_Name               | Site_PI |
|---------------|-----------------------------|---------------------------|---------|
| ~             | ~                           | Lynsey Dean               |         |
| ~             | ~                           | Lisa Dobson (nee Child)   |         |
| ~             | ~                           | Sharon Dunn (nee Johnson) |         |
| ~             | ~                           | Sue Green                 |         |
| ~             | ~                           | Julie Griffiths           |         |
| ~             | ~                           | Paul Griffiths            |         |
| ~             | ~                           | Jasima Latif              |         |
| ~             | ~                           | Kevin McDonald            |         |
| ~             | ~                           | Pauline Pilkington        |         |
| ~             | ~                           | Dawn Porter               |         |
| ~             | ~                           | Philip Reynolds           |         |
| ~             | ~                           | Sandra Robinson           |         |
| ~             | ~                           | Peter Robson              |         |
| ~             | ~                           | Nidhi Sibal               |         |
| ~             | ~                           | Katy Treherne             |         |
| ~             | ~                           | Emma Whitby               |         |
| ~             | ~                           | Pembe Yesildag            |         |
| Liverpool, UK | University Hospital Aintree | Peter Robson              | PI      |
| ~             | ~                           | Ian Allen                 |         |
| ~             | ~                           | Wesley Artist             |         |
| ~             | ~                           | Lucy Berresford           |         |
| ~             | ~                           | Lisa Dobson (nee Child)   |         |
| ~             | ~                           | Rachael Fergusson         |         |
| ~             | ~                           | Julie Griffiths           |         |
| ~             | ~                           | Paul Hill                 |         |
| ~             | ~                           | Lorraine Lancaster        |         |
| ~             | ~                           | Haley McCulloch           |         |
| ~             | ~                           | Leigh Pauls               |         |
| ~             | ~                           | Sandra Robinson           |         |
| London, UK    | Charing Cross Hospital      | Alison Falconer           | PI      |
| ~             | ~                           | Stephen Mangar            | Co-I    |
| ~             | ~                           | Najma Ahmed               |         |
| ~             | ~                           | Kwame Ansu                |         |

## INVESTIGATORS AND COLLABORATORS: SITE STAFF

Staff on site delegation logs

| City       | Care_Site               | Person_Name              | Site_PI |
|------------|-------------------------|--------------------------|---------|
| ~          | ~                       | Gareth Barker            |         |
| ~          | ~                       | Bindu Chikkamuniyappa    |         |
| ~          | ~                       | Ross Dalton-Short        |         |
| ~          | ~                       | Andrea Davis-Cook        |         |
| ~          | ~                       | Steve Edwards            |         |
| ~          | ~                       | Daisy Floyd              |         |
| ~          | ~                       | Jill Gallagher           |         |
| ~          | ~                       | Paul Kabuubi             |         |
| ~          | ~                       | Zohanon Sabine Loko      |         |
| ~          | ~                       | Ethna Mannion            |         |
| ~          | ~                       | Akeema Paul              |         |
| ~          | ~                       | Ibiyemi Sadare (Olaleye) |         |
| ~          | ~                       | Naveed Sarwar            |         |
| ~          | ~                       | Stephanie Steadman       |         |
| ~          | ~                       | Samantha Weller          |         |
| London, UK | Guy's Hospital (London) | Sarah Rudman             | PI      |
| ~          | ~                       | Sarah Howiett            | Co-I    |
| ~          | ~                       | Vishal Manik             | Co-I    |
| ~          | ~                       | Chara Stavrika           | Co-I    |
| ~          | ~                       | Awo Abdi                 |         |
| ~          | ~                       | Delali Adjogatse         |         |
| ~          | ~                       | Ajay Aggarwal            |         |
| ~          | ~                       | Fahim Ahmed              |         |
| ~          | ~                       | Rayhan Ahmed             |         |
| ~          | ~                       | Ramin Ajami              |         |
| ~          | ~                       | Susanne Allan            |         |
| ~          | ~                       | Stephanie Argue          |         |
| ~          | ~                       | Caterina Aversa          |         |
| ~          | ~                       | Eva Batovska             |         |
| ~          | ~                       | Ronald Beaney            |         |
| ~          | ~                       | Thomas Bird              |         |
| ~          | ~                       | Trevor Bott              |         |
| ~          | ~                       | Sabeeh Butt              |         |



## INVESTIGATORS AND COLLABORATORS: SITE STAFF

Staff on site delegation logs

| City | Care_Site | Person_Name            | Site_PI |
|------|-----------|------------------------|---------|
| ~    | ~         | Declan Cahill          |         |
| ~    | ~         | Jozer Calara           |         |
| ~    | ~         | Donna Cassidy          |         |
| ~    | ~         | Emilia Caverly         |         |
| ~    | ~         | Charleen Chan Wah Hak  |         |
| ~    | ~         | Belinda Chitando       |         |
| ~    | ~         | Simon Chowdhury        |         |
| ~    | ~         | Chi Yee Chung          |         |
| ~    | ~         | Sharon Clovis          |         |
| ~    | ~         | Danielle Crawley       |         |
| ~    | ~         | Francesca Curran       |         |
| ~    | ~         | Kafui Dossa            |         |
| ~    | ~         | Michelle Dutton        |         |
| ~    | ~         | Deborah Enting         |         |
| ~    | ~         | Louisa Fleure          |         |
| ~    | ~         | Angel Garcia-Imhof     |         |
| ~    | ~         | Tahereh Ghadimi        |         |
| ~    | ~         | Sharmistha Ghosh       |         |
| ~    | ~         | Clare Gilson           |         |
| ~    | ~         | Claire Glendon         |         |
| ~    | ~         | Charalampos Gousis     |         |
| ~    | ~         | Teresa Guerrero-Urbano |         |
| ~    | ~         | Sarah Hargreaves       |         |
| ~    | ~         | Peter Harper           |         |
| ~    | ~         | Simon Hughes           |         |
| ~    | ~         | Sheeba Irshad          |         |
| ~    | ~         | Ruth Johnson           |         |
| ~    | ~         | Eleni Josephides       |         |
| ~    | ~         | Debra Josephs          |         |
| ~    | ~         | Lucy Juggins           |         |
| ~    | ~         | Srivani Kandasamy      |         |
| ~    | ~         | Matthaius Kapiris      |         |
| ~    | ~         | Anna Karpathakis       |         |

## INVESTIGATORS AND COLLABORATORS: SITE STAFF

Staff on site delegation logs

| City | Care_Site | Person_Name             | Site_PI |
|------|-----------|-------------------------|---------|
| ~    | ~         | Muhammad Khan           |         |
| ~    | ~         | Rosalind Kieran         |         |
| ~    | ~         | Sarah King              |         |
| ~    | ~         | Ursula Kirwan           |         |
| ~    | ~         | Lawrence Krieger        |         |
| ~    | ~         | Hartmut Kristeleit      |         |
| ~    | ~         | Cheryl Lawrence         |         |
| ~    | ~         | Archie Macnair          |         |
| ~    | ~         | Thubeena Manickavasagar |         |
| ~    | ~         | Louisa McDonald         |         |
| ~    | ~         | Sharon McPherson        |         |
| ~    | ~         | Vasiliki Michalarea     |         |
| ~    | ~         | Stephen Morris          |         |
| ~    | ~         | Vinod Mullassery        |         |
| ~    | ~         | Ngozi Muoneke           |         |
| ~    | ~         | Janette Nichol          |         |
| ~    | ~         | Emma O'Connor           |         |
| ~    | ~         | Temi Olusi              |         |
| ~    | ~         | Anna Parker             |         |
| ~    | ~         | Elias Pintus            |         |
| ~    | ~         | Rick Popert             |         |
| ~    | ~         | Vivien Quan             |         |
| ~    | ~         | Antonio Querol-Rubiera  |         |
| ~    | ~         | Lucy Reed               |         |
| ~    | ~         | Philip Reynolds         |         |
| ~    | ~         | Catherine Rogers        |         |
| ~    | ~         | Hannah Rush             |         |
| ~    | ~         | Linda Shephard          |         |
| ~    | ~         | Sumeet Sisodia          |         |
| ~    | ~         | Susie Slater            |         |
| ~    | ~         | Helen Snow              |         |
| ~    | ~         | Anita Soma              |         |
| ~    | ~         | Thomas Spencer          |         |

## INVESTIGATORS AND COLLABORATORS: SITE STAFF

Staff on site delegation logs

| City       | Care_Site                           | Person_Name              | Site_PI |
|------------|-------------------------------------|--------------------------|---------|
| ~          | ~                                   | Rushan Sylva             |         |
| ~          | ~                                   | Kiruthikah Thillai       |         |
| ~          | ~                                   | Rebecca Todd             |         |
| ~          | ~                                   | Daniel Tong              |         |
| ~          | ~                                   | Gerry Trillana           |         |
| ~          | ~                                   | Eirini Tsotra            |         |
| ~          | ~                                   | Nikolaos Tsoukalas       |         |
| ~          | ~                                   | Jennifer Turner          |         |
| ~          | ~                                   | Suzanne Vizer            |         |
| ~          | ~                                   | Mark Voskoboynik         |         |
| ~          | ~                                   | Sally Walker             |         |
| ~          | ~                                   | Rebecca Way              |         |
| ~          | ~                                   | Kate Williams            |         |
| ~          | ~                                   | Yin Wu                   |         |
| ~          | ~                                   | Kamarul Zaki             |         |
| London, UK | Hammersmith Hospital                | Alison Falconer          | PI      |
| ~          | ~                                   | Stephen Mangar           | Co-I    |
| ~          | ~                                   | Ilyas Ali                |         |
| ~          | ~                                   | Steve Edwards            |         |
| ~          | ~                                   | Nikki Kettley            |         |
| ~          | ~                                   | Emily Pickford           |         |
| ~          | ~                                   | Regina Storch            |         |
| London, UK | King George Hospital                | Neil Fisher              |         |
| ~          | ~                                   | Ramachandran Subramaniam |         |
| London, UK | Queen Elizabeth Hospital (Woolwich) | Sindu Vivekanandan       | PI      |
| ~          | ~                                   | Vinod Muellesey          | Ex-PI   |
| ~          | ~                                   | Vinod Mullassery         | Co-I    |
| ~          | ~                                   | Elias Pintus             | Co-I    |
| ~          | ~                                   | Rayhan Ahmed             |         |
| ~          | ~                                   | Shahreen Ahmed           |         |
| ~          | ~                                   | Jagdev Bains             |         |
| ~          | ~                                   | Laura Beschizza          |         |
| ~          | ~                                   | Belinda Chitando         |         |

## INVESTIGATORS AND COLLABORATORS: SITE STAFF

Staff on site delegation logs

| City       | Care_Site           | Person_Name           | Site_PI |
|------------|---------------------|-----------------------|---------|
| ~          | ~                   | Sharai Chitando       |         |
| ~          | ~                   | Suzanne Chukundah     |         |
| ~          | ~                   | Miriam Cottle         |         |
| ~          | ~                   | Nadia El-Sayed        |         |
| ~          | ~                   | Martha Handousa       |         |
| ~          | ~                   | Rachel Harper         |         |
| ~          | ~                   | Hazel Harrop          |         |
| ~          | ~                   | Nigel Holmes          |         |
| ~          | ~                   | Simon Hughes          |         |
| ~          | ~                   | Abhijit Jadhav        |         |
| ~          | ~                   | Abel Jalloh           |         |
| ~          | ~                   | Bridget Kabagambe     |         |
| ~          | ~                   | Arunansu Kar          |         |
| ~          | ~                   | Sagira Khatun         |         |
| ~          | ~                   | Hartmut Kristeleit    |         |
| ~          | ~                   | Maria Liskova         |         |
| ~          | ~                   | Luke Maidment         |         |
| ~          | ~                   | Nick Maisey           |         |
| ~          | ~                   | Joyce Maravi          |         |
| ~          | ~                   | Jennifer Martin       |         |
| ~          | ~                   | Theodorah Nago        |         |
| ~          | ~                   | Melody Ncube          |         |
| ~          | ~                   | Eti Omoregie          |         |
| ~          | ~                   | Samia Pilgrim         |         |
| ~          | ~                   | Lee Porin             |         |
| ~          | ~                   | Philip Reynolds       |         |
| ~          | ~                   | Thomas Sarkodie       |         |
| ~          | ~                   | Aarti Shah            |         |
| ~          | ~                   | Anne-Marie Vindidu    |         |
| ~          | ~                   | Shanna Wilson         |         |
| London, UK | Royal Free Hospital | Sarah Needleman       | PI      |
| ~          | ~                   | Maria Vilarino-Varela | Ex-PI   |
| ~          | ~                   | Magdalena Kubiak      | Co-I    |

## INVESTIGATORS AND COLLABORATORS: SITE STAFF

Staff on site delegation logs

| City       | Care_Site                       | Person_Name           | Site_PI |
|------------|---------------------------------|-----------------------|---------|
| ~          | ~                               | Nicola Rosenfelder    | Co-I    |
| ~          | ~                               | Emily Scott           | Co-I    |
| ~          | ~                               | Kate Smith            | Co-I    |
| ~          | ~                               | Grant Stewart         | Co-I    |
| ~          | ~                               | Naomi Anderson        |         |
| ~          | ~                               | Juniebel Cooke        |         |
| ~          | ~                               | Emma Douch            |         |
| ~          | ~                               | Sara Fawcitt          |         |
| ~          | ~                               | Jessica Hunt          |         |
| ~          | ~                               | Claire Jarvis         |         |
| ~          | ~                               | Marisa Lanzman        |         |
| ~          | ~                               | Ruo Chen Li           |         |
| ~          | ~                               | Su Fung Lo            |         |
| ~          | ~                               | Kharishma Makani      |         |
| ~          | ~                               | Angela McCadden       |         |
| ~          | ~                               | Sabina Melander       |         |
| ~          | ~                               | Aarti Nandani         |         |
| ~          | ~                               | Lorna O'Shea          |         |
| ~          | ~                               | Anna Osadcow          |         |
| ~          | ~                               | Katherine Pigott      |         |
| ~          | ~                               | Hannah Powell         |         |
| ~          | ~                               | Kaliyanee Ramtohol    |         |
| ~          | ~                               | Daniel Smith          |         |
| ~          | ~                               | Tesha Suddason        |         |
| ~          | ~                               | Elizabeth Woodford    |         |
| London, UK | Royal Marsden Hospital (London) | Vincent Khoo          | PI      |
| ~          | ~                               | Ewan Chapman          | Co-I    |
| ~          | ~                               | Laillah-Crystal Banda |         |
| ~          | ~                               | Trevor Bott           |         |
| ~          | ~                               | Karen Brooks          |         |
| ~          | ~                               | Karen Chan            |         |
| ~          | ~                               | Rosalind Eeles        |         |
| ~          | ~                               | Nicola Harman         |         |

## INVESTIGATORS AND COLLABORATORS: SITE STAFF

Staff on site delegation logs

| City       | Care_Site                         | Person_Name             | Site_PI |
|------------|-----------------------------------|-------------------------|---------|
| ~          | ~                                 | Holly Hogan             |         |
| ~          | ~                                 | James Lowe              |         |
| ~          | ~                                 | Nicola Lucas            |         |
| ~          | ~                                 | Chloe McCormack         |         |
| ~          | ~                                 | Jennifer Morrison       |         |
| ~          | ~                                 | Vedang Murthy           |         |
| ~          | ~                                 | Annette Musallam        |         |
| ~          | ~                                 | Marisa Pinto Peixoto    |         |
| ~          | ~                                 | Suraya Quadir           |         |
| ~          | ~                                 | Alison Reid             |         |
| ~          | ~                                 | Debbie Rolfe            |         |
| ~          | ~                                 | Bernard Sill            |         |
| ~          | ~                                 | Bernard Siu             |         |
| ~          | ~                                 | Ruth Stafferton         |         |
| ~          | ~                                 | Helen Stidwell          |         |
| ~          | ~                                 | Sarah Storrs            |         |
| ~          | ~                                 | Debra Townsend-Thorn    |         |
| ~          | ~                                 | Nicholas Van As         |         |
| ~          | ~                                 | Vijitha Vijayakumar     |         |
| ~          | ~                                 | Li Wancheung            |         |
| London, UK | St Bartholomews Hospital (London) | Karen Tipples           | PI      |
| ~          | ~                                 | Paula Wells             | Co-I    |
| ~          | ~                                 | Marina Baccharini       |         |
| ~          | ~                                 | P Cathcart              |         |
| ~          | ~                                 | Samantha Chetiyawardana |         |
| ~          | ~                                 | Fatjon Dekaj            |         |
| ~          | ~                                 | Shahanara Ferdous       |         |
| ~          | ~                                 | Stephanie Gibbs         |         |
| ~          | ~                                 | Denise Humfress         |         |
| ~          | ~                                 | Resmi Jayachandran      |         |
| ~          | ~                                 | Janet Kiff              |         |
| ~          | ~                                 | Cheryl Lawrence         |         |
| ~          | ~                                 | Wing-Kin Liu            |         |

## INVESTIGATORS AND COLLABORATORS: SITE STAFF

Staff on site delegation logs

| City       | Care_Site                    | Person_Name           | Site_PI |
|------------|------------------------------|-----------------------|---------|
| ~          | ~                            | Sebastien Martin      |         |
| ~          | ~                            | Alastair Nicholson    |         |
| ~          | ~                            | Jude Nixon            |         |
| ~          | ~                            | Janet Oladimeji       |         |
| ~          | ~                            | Hannah Payne          |         |
| ~          | ~                            | Oscar Riches          |         |
| ~          | ~                            | Jonathon Shamash      |         |
| ~          | ~                            | Cavitha Vivekananthan |         |
| London, UK | St Georges Hospital (London) | Mehran Afshar         | PI      |
| ~          | ~                            | Laura Camburn         | Co-I    |
| ~          | ~                            | Jason Chow            | Co-I    |
| ~          | ~                            | Nia Alsamarrai        |         |
| ~          | ~                            | Michael Brown         |         |
| ~          | ~                            | Sue Cromarty          |         |
| ~          | ~                            | Alice Dainty          |         |
| ~          | ~                            | Deirdre Daly          |         |
| ~          | ~                            | Serena Dover          |         |
| ~          | ~                            | Gelareh Eslamian      |         |
| ~          | ~                            | Claire Gilmartin      |         |
| ~          | ~                            | Sophie Golden         |         |
| ~          | ~                            | Jane Gregg            |         |
| ~          | ~                            | Hakim Guessous        |         |
| ~          | ~                            | Anne Haldeos          |         |
| ~          | ~                            | Sam Hollingworth      |         |
| ~          | ~                            | Geoffrey Howell       |         |
| ~          | ~                            | Mohammed Mahgoub      |         |
| ~          | ~                            | Roxane Mather         |         |
| ~          | ~                            | Sophie McGrath        |         |
| ~          | ~                            | Asha Mistry           |         |
| ~          | ~                            | Uforma Ogrigri        |         |
| ~          | ~                            | Chandni Patel         |         |
| ~          | ~                            | Lisa Pickering        |         |
| ~          | ~                            | Mark Quarrell         |         |

## INVESTIGATORS AND COLLABORATORS: SITE STAFF

Staff on site delegation logs

| City       | Care_Site                   | Person_Name             | Site_PI |
|------------|-----------------------------|-------------------------|---------|
| ~          | ~                           | Debbie Rolfe            |         |
| ~          | ~                           | Helen Tighe             |         |
| ~          | ~                           | Juel Tuazon             |         |
| ~          | ~                           | Robert Varro            |         |
| London, UK | St Marys Hospital (London)  | Alison Falconer         | PI      |
| ~          | ~                           | Melloney Allnutt        |         |
| ~          | ~                           | Gareth Barker           |         |
| ~          | ~                           | Angela Chamberlain      |         |
| ~          | ~                           | Bindu Chikkamuniyappa   |         |
| ~          | ~                           | Laura Custins           |         |
| ~          | ~                           | Andrea Davis-Cook       |         |
| ~          | ~                           | Steve Edwards           |         |
| ~          | ~                           | Daisy Floyd             |         |
| ~          | ~                           | Gillian Hornzee         |         |
| ~          | ~                           | Joy Liao                |         |
| ~          | ~                           | Joy Liao                |         |
| ~          | ~                           | Zohanon Sabine Loko     |         |
| ~          | ~                           | Stephen Mangar          |         |
| ~          | ~                           | Akeema Paul             |         |
| ~          | ~                           | Severine Rey            |         |
| ~          | ~                           | Simon Stewart           |         |
| London, UK | University College Hospital | Ursula McGovern         | PI      |
| ~          | ~                           | Richard Kaplan          | Co-I    |
| ~          | ~                           | Mark Linch              | Co-I    |
| ~          | ~                           | Heather Payne           | Co-I    |
| ~          | ~                           | Adrienne Abioye         |         |
| ~          | ~                           | Didem Agdiran           |         |
| ~          | ~                           | Javeria Akhtar          |         |
| ~          | ~                           | Hannah Ansell           |         |
| ~          | ~                           | Uzma Asghar             |         |
| ~          | ~                           | Natasha Aslam           |         |
| ~          | ~                           | Aileen Austria          |         |
| ~          | ~                           | Holly Baker (nee. Wing) |         |



## INVESTIGATORS AND COLLABORATORS: SITE STAFF

Staff on site delegation logs

| City          | Care_Site                     | Person_Name             | Site_PI |
|---------------|-------------------------------|-------------------------|---------|
| ~             | ~                             | Ignacio Blanch          |         |
| ~             | ~                             | Judith Cave             |         |
| ~             | ~                             | Noan-Minh Chau          |         |
| ~             | ~                             | Patricia Danaswamy      |         |
| ~             | ~                             | Reena Davda             |         |
| ~             | ~                             | Danny Garrett           |         |
| ~             | ~                             | Annelies Gillesen       |         |
| ~             | ~                             | Roshni Goel             |         |
| ~             | ~                             | Stephen Harland         |         |
| ~             | ~                             | Yemi Ilumoka            |         |
| ~             | ~                             | Bihani Kularatne        |         |
| ~             | ~                             | Jane Leach              |         |
| ~             | ~                             | Suzy Lowi               |         |
| ~             | ~                             | John Masters            |         |
| ~             | ~                             | Anita Mitra             |         |
| ~             | ~                             | Dieo Ottaviani          |         |
| ~             | ~                             | Kristian Warnes         |         |
| ~             | ~                             | Agnieska Zielonka       |         |
| ~             | ~                             | Helene Zilkha           |         |
| London, UK    | University College London     | Holly Baker (nee. Wing) |         |
| London, UK    | University Hospital Lewisham  | Aarti Shah              |         |
| London, UK    | Whittington Hospital (London) | Simon Wan               |         |
| Maidstone, UK | Maidstone Hospital            | Patryk Brulinski        | PI      |
| ~             | ~                             | Delali Adjogatse        |         |
| ~             | ~                             | Claire Baldry           |         |
| ~             | ~                             | Sharon Beesley          |         |
| ~             | ~                             | Jess Brady              |         |
| ~             | ~                             | Vivienne Breen          |         |
| ~             | ~                             | Jane Brown              |         |
| ~             | ~                             | Su Burrage              |         |
| ~             | ~                             | Clare Calvert           |         |
| ~             | ~                             | Amanda Clarke           |         |
| ~             | ~                             | Laura Clayton           |         |

## INVESTIGATORS AND COLLABORATORS: SITE STAFF

Staff on site delegation logs

| City           | Care_Site         | Person_Name          | Site_PI |
|----------------|-------------------|----------------------|---------|
| ~              | ~                 | Emma Craske          |         |
| ~              | ~                 | Alison Davison       |         |
| ~              | ~                 | Anna English         |         |
| ~              | ~                 | Clary Evans          |         |
| ~              | ~                 | Matthew Fittall      |         |
| ~              | ~                 | Gavin Fossey         |         |
| ~              | ~                 | Louise Hooper-Gilham |         |
| ~              | ~                 | Carmel Jope          |         |
| ~              | ~                 | Emma Kipps           |         |
| ~              | ~                 | Kathryn Lees         |         |
| ~              | ~                 | Sarah Martins        |         |
| ~              | ~                 | Romaana Mir          |         |
| ~              | ~                 | Jane Murray          |         |
| ~              | ~                 | Ian Pamphlett        |         |
| ~              | ~                 | Joanne Patterson     |         |
| ~              | ~                 | Ann Phillips         |         |
| ~              | ~                 | Alison Richards      |         |
| ~              | ~                 | Verity Roberts       |         |
| ~              | ~                 | Alicia Synowiec      |         |
| ~              | ~                 | Henry Taylor         |         |
| ~              | ~                 | Katy Taylor          |         |
| ~              | ~                 | Amie Thomas          |         |
| ~              | ~                 | Lisa Tribe           |         |
| ~              | ~                 | Joanne Williams      |         |
| ~              | ~                 | Claudia Woodger      |         |
| Manchester, UK | Christie Hospital | Noel Clarke          | PI      |
| ~              | ~                 | Ruth Conroy          | Co-I    |
| ~              | ~                 | Christoph Oing       | Co-I    |
| ~              | ~                 | Ali Al-Hashimi       |         |
| ~              | ~                 | Susan Arrand         |         |
| ~              | ~                 | Sreeja Aruketty      |         |
| ~              | ~                 | Ian Bottomley        |         |
| ~              | ~                 | Anna Bowron          |         |

## INVESTIGATORS AND COLLABORATORS: SITE STAFF

Staff on site delegation logs

| City | Care_Site | Person_Name                      | Site_PI |
|------|-----------|----------------------------------|---------|
| ~    | ~         | Michael Braun                    |         |
| ~    | ~         | Anna Bruzzan                     |         |
| ~    | ~         | Megan Bunce                      |         |
| ~    | ~         | Emma Burke                       |         |
| ~    | ~         | Sharon Capper                    |         |
| ~    | ~         | Clara Chan                       |         |
| ~    | ~         | Stephen Chin                     |         |
| ~    | ~         | Ananya Choudhury                 |         |
| ~    | ~         | Richard Cowan                    |         |
| ~    | ~         | Catherine Coyle                  |         |
| ~    | ~         | Sue Davison                      |         |
| ~    | ~         | Sarah-Ellen Ellen (née McCarthy) |         |
| ~    | ~         | Tony Elliott                     |         |
| ~    | ~         | Thiraviyam Elumalai              |         |
| ~    | ~         | Kim Fair                         |         |
| ~    | ~         | Stefanie Fisdor                  |         |
| ~    | ~         | Laura Flanagan                   |         |
| ~    | ~         | Silke Gillessen                  |         |
| ~    | ~         | Lynne Gilmore                    |         |
| ~    | ~         | Sarah Green                      |         |
| ~    | ~         | Amber Hart                       |         |
| ~    | ~         | Charlotte Heywood                |         |
| ~    | ~         | Andrew Hudson                    |         |
| ~    | ~         | Cathryn James                    |         |
| ~    | ~         | A Jegannathen                    |         |
| ~    | ~         | Cathryn Jones                    |         |
| ~    | ~         | Ather Kazmi                      |         |
| ~    | ~         | Jacqueline Livsey                |         |
| ~    | ~         | John Logue                       |         |
| ~    | ~         | Emma Lowther                     |         |
| ~    | ~         | Jeanette Lyons                   |         |
| ~    | ~         | Damian McCall                    |         |
| ~    | ~         | Damian McCaul                    |         |

## INVESTIGATORS AND COLLABORATORS: SITE STAFF

Staff on site delegation logs

| City           | Care_Site           | Person_Name         | Site_PI |
|----------------|---------------------|---------------------|---------|
| ~              | ~                   | Samah Mughal        |         |
| ~              | ~                   | Roonak Nazari       |         |
| ~              | ~                   | Kate O'Connor       |         |
| ~              | ~                   | Jackie O'Dwyer      |         |
| ~              | ~                   | Joanne Oliver       |         |
| ~              | ~                   | Ekugbe Onogbe       |         |
| ~              | ~                   | Ekugbe Onogbe       |         |
| ~              | ~                   | Alkesh Patel        |         |
| ~              | ~                   | Kamlesh Patel       |         |
| ~              | ~                   | Maria Petsa         |         |
| ~              | ~                   | Catherine Pettersen |         |
| ~              | ~                   | Vijay Ramani        |         |
| ~              | ~                   | Catherine Redshaw   |         |
| ~              | ~                   | Vijay Sangar        |         |
| ~              | ~                   | Sue Seifi           |         |
| ~              | ~                   | Sarah-Ellen Smith   |         |
| ~              | ~                   | Yee Pei Song        |         |
| ~              | ~                   | Willemijn Spoor     |         |
| ~              | ~                   | Martin Swinton      |         |
| ~              | ~                   | Viv Thomas          |         |
| ~              | ~                   | David Thompson      |         |
| ~              | ~                   | Shaun Tolan         |         |
| ~              | ~                   | Anna Tran           |         |
| ~              | ~                   | Trishna Uttamlal    |         |
| ~              | ~                   | Marie Woolley       |         |
| ~              | ~                   | Lucy Worsley        |         |
| ~              | ~                   | James Wylie         |         |
| ~              | ~                   | You Yone            |         |
| ~              | ~                   | salina tsui         |         |
| Manchester, UK | Withington Hospital | Vijay Sangar        | PI      |
| ~              | ~                   | Vijay Ramani        | Co-I    |
| ~              | ~                   | Humera Ahmed        |         |
| ~              | ~                   | Linda Bailey        |         |

## INVESTIGATORS AND COLLABORATORS: SITE STAFF

Staff on site delegation logs

| City           | Care_Site            | Person_Name           | Site_PI |
|----------------|----------------------|-----------------------|---------|
| ~              | ~                    | Vivienne Benson       |         |
| ~              | ~                    | Julie Bramley         |         |
| ~              | ~                    | Rebecca Corless       |         |
| ~              | ~                    | Tania Cutts           |         |
| ~              | ~                    | Annie Duffy           |         |
| ~              | ~                    | Beatriz Duran Jimenez |         |
| ~              | ~                    | A. Emara              |         |
| ~              | ~                    | Kathryn Fellows       |         |
| ~              | ~                    | Anna Gipson           |         |
| ~              | ~                    | Stephanie Hargreaves  |         |
| ~              | ~                    | Helen Haydock         |         |
| ~              | ~                    | Tarnya Hulme          |         |
| ~              | ~                    | Damian McCall         |         |
| ~              | ~                    | Thobekile Mthethwa    |         |
| ~              | ~                    | Fiona Murtagh         |         |
| ~              | ~                    | Lillian Partington    |         |
| ~              | ~                    | Lindsay Piper         |         |
| ~              | ~                    | Tracey Platt          |         |
| ~              | ~                    | Catherine Redshaw     |         |
| ~              | ~                    | Karen Robb            |         |
| ~              | ~                    | Janet Smith           |         |
| ~              | ~                    | Lorraine Turner       |         |
| ~              | ~                    | James Wylie           |         |
| Manchester, UK | Wythenshawe Hospital | Vijay Sangar          | PI      |
| ~              | ~                    | Linda Bailey          |         |
| ~              | ~                    | Vivienne Benson       |         |
| ~              | ~                    | Angela Chrisopoulou   |         |
| ~              | ~                    | Annie Duffy           |         |
| ~              | ~                    | Beatriz Duran Jimenez |         |
| ~              | ~                    | A. Emara              |         |
| ~              | ~                    | Julie Fielding        |         |
| ~              | ~                    | Angela Gowrie         |         |
| ~              | ~                    | Wendy Guest           |         |

## INVESTIGATORS AND COLLABORATORS: SITE STAFF

Staff on site delegation logs

| City        | Care_Site                                 | Person_Name         | Site_PI |
|-------------|-------------------------------------------|---------------------|---------|
| ~           | ~                                         | Sarah Liptrott      |         |
| ~           | ~                                         | Claire McGuire      |         |
| ~           | ~                                         | Kirsty Melia        |         |
| ~           | ~                                         | Thobekile Mthethwa  |         |
| ~           | ~                                         | Lindsay Piper       |         |
| ~           | ~                                         | Tracey Platt        |         |
| ~           | ~                                         | Kathryn Slevin      |         |
| Margate, UK | Queen Elizabeth The Queen Mother Hospital | Carys Thomas        | PI      |
| ~           | ~                                         | Albert Edwards      | Co-I    |
| ~           | ~                                         | Jessica Little      | Co-I    |
| ~           | ~                                         | Natasha Mithal      | Co-I    |
| ~           | ~                                         | Rakesh Raman        | Co-I    |
| ~           | ~                                         | Jennifer Turner     | Co-I    |
| ~           | ~                                         | Ifigenia Vasiliadou | Co-I    |
| ~           | ~                                         | Louise Allen        |         |
| ~           | ~                                         | Bonny Appleby       |         |
| ~           | ~                                         | Sharon Beesley      |         |
| ~           | ~                                         | Hayley Blackgrove   |         |
| ~           | ~                                         | Tracy Boakes        |         |
| ~           | ~                                         | Patryk Brulinski    |         |
| ~           | ~                                         | Julie Buckley       |         |
| ~           | ~                                         | Miguel Capo-Mir     |         |
| ~           | ~                                         | Natalie Catt        |         |
| ~           | ~                                         | Mathilda Cominos    |         |
| ~           | ~                                         | Denise Crawford     |         |
| ~           | ~                                         | Nikki Crisp         |         |
| ~           | ~                                         | Steve Dann          |         |
| ~           | ~                                         | Julie-Ann Davies    |         |
| ~           | ~                                         | Susan Drakeley      |         |
| ~           | ~                                         | Clary Evans         |         |
| ~           | ~                                         | Sam Gibson          |         |
| ~           | ~                                         | Andrew Gillian      |         |
| ~           | ~                                         | Louise Gladwell     |         |

## INVESTIGATORS AND COLLABORATORS: SITE STAFF

Staff on site delegation logs

| City | Care_Site | Person_Name            | Site_PI |
|------|-----------|------------------------|---------|
| ~    | ~         | Coral Greenstreet      |         |
| ~    | ~         | Sandra Holness         |         |
| ~    | ~         | Laura Kehoe            |         |
| ~    | ~         | Sue Kelly              |         |
| ~    | ~         | Rachel Larkins         |         |
| ~    | ~         | Kathryn Lees           |         |
| ~    | ~         | Sarah Lightfoot        |         |
| ~    | ~         | Sarah Lines            |         |
| ~    | ~         | Margaret Lipsham       |         |
| ~    | ~         | Sydney Loveland        |         |
| ~    | ~         | Rohit Malde            |         |
| ~    | ~         | Kim Mears              |         |
| ~    | ~         | Sharon Middleton       |         |
| ~    | ~         | Arafat Mirza           |         |
| ~    | ~         | Kannon Nathan          |         |
| ~    | ~         | Udaiveer Panwar        |         |
| ~    | ~         | Claire Pelham          |         |
| ~    | ~         | Karen Robinson         |         |
| ~    | ~         | Susan Rogers           |         |
| ~    | ~         | Lesley Rose            |         |
| ~    | ~         | Cindy Slater           |         |
| ~    | ~         | Mathini Sridharan      |         |
| ~    | ~         | Stephane Tankoua       |         |
| ~    | ~         | Katy Taylor            |         |
| ~    | ~         | Kim Travis             |         |
| ~    | ~         | Alba Tubau             |         |
| ~    | ~         | Kathleen (Kathy) Walsh |         |
| ~    | ~         | Paula Whichelo         |         |
| ~    | ~         | Claire White           |         |
| ~    | ~         | Jo Williams            |         |
| ~    | ~         | Joanne Williams        |         |
| ~    | ~         | Elizabeth Williamson   |         |
| ~    | ~         | Victoria Williamson    |         |

## INVESTIGATORS AND COLLABORATORS: SITE STAFF

Staff on site delegation logs

| City              | Care_Site                      | Person_Name                    | Site_PI |
|-------------------|--------------------------------|--------------------------------|---------|
| ~                 | ~                              | Marian Wood                    |         |
| ~                 | ~                              | Linda Wray                     |         |
| ~                 | ~                              | Hilary Zurakovsky              |         |
| Middlesbrough, UK | James Cook University Hospital | Clive Peedell                  | PI      |
| ~                 | ~                              | Alison Barnes                  |         |
| ~                 | ~                              | Helen Carver                   |         |
| ~                 | ~                              | David Chadwick                 |         |
| ~                 | ~                              | Alison Chilvers                |         |
| ~                 | ~                              | Helen Dunn                     |         |
| ~                 | ~                              | Claire Elliott                 |         |
| ~                 | ~                              | Vicky Hanlon                   |         |
| ~                 | ~                              | John Hardman                   |         |
| ~                 | ~                              | Anne Hardwick                  |         |
| ~                 | ~                              | Keith Harland                  |         |
| ~                 | ~                              | Charlotte Jacobs(née Kitching) |         |
| ~                 | ~                              | Paul Jones-King                |         |
| ~                 | ~                              | Mohammed Kagzi                 |         |
| ~                 | ~                              | Sarah Kiddell                  |         |
| ~                 | ~                              | Carol Long                     |         |
| ~                 | ~                              | Emanuela Mahmoud               |         |
| ~                 | ~                              | Sarah McAuliffe                |         |
| ~                 | ~                              | Julia McBride                  |         |
| ~                 | ~                              | Lynne Naylor                   |         |
| ~                 | ~                              | Lisa Peacock (nee Wayman)      |         |
| ~                 | ~                              | Julie Potts                    |         |
| ~                 | ~                              | Steven Pratt                   |         |
| ~                 | ~                              | Fiona Rowling                  |         |
| ~                 | ~                              | Luca Settimo                   |         |
| ~                 | ~                              | Devadasan Shakespeare          |         |
| ~                 | ~                              | Agnieszka Skotnicka            |         |
| ~                 | ~                              | Emma Thompson                  |         |
| ~                 | ~                              | Jane Thompson                  |         |
| ~                 | ~                              | Katherine Tyler                |         |



## INVESTIGATORS AND COLLABORATORS: SITE STAFF

Staff on site delegation logs

| City                    | Care_Site                  | Person_Name       | Site_PI |
|-------------------------|----------------------------|-------------------|---------|
| ~                       | ~                          | Hans Van der Voet |         |
| ~                       | ~                          | Andrea Watson     |         |
| ~                       | ~                          | David Wilson      |         |
| ~                       | ~                          | Jason Wong        |         |
| ~                       | ~                          | Maha Zarroug      |         |
| Newcastle upon Tyne, UK | Newcastle General Hospital | Judith Moore      |         |
| Newcastle-upon-Tyne, UK | Freeman Hospital           | Ashraf Azzabi     | PI      |
| ~                       | ~                          | John Frew         | Co-I    |
| ~                       | ~                          | Shahid Iqbal      | Co-I    |
| ~                       | ~                          | Rhona McMenemin   | Co-I    |
| ~                       | ~                          | Ian Pedley        | Co-I    |
| ~                       | ~                          | Craig Alderson    |         |
| ~                       | ~                          | Katie Bain        |         |
| ~                       | ~                          | Lucy Blackwell    |         |
| ~                       | ~                          | Lauren Boal       |         |
| ~                       | ~                          | Penny Bradley     |         |
| ~                       | ~                          | Elle Cameron      |         |
| ~                       | ~                          | Ian Campbell      |         |
| ~                       | ~                          | Roger Carr        |         |
| ~                       | ~                          | Kay Carson        |         |
| ~                       | ~                          | Robert Chandler   |         |
| ~                       | ~                          | Caroline Dobeson  |         |
| ~                       | ~                          | Hannah Downs      |         |
| ~                       | ~                          | Sue Farrell       |         |
| ~                       | ~                          | Hazel Forsyth     |         |
| ~                       | ~                          | Elaine Greaves    |         |
| ~                       | ~                          | Noor Harris       |         |
| ~                       | ~                          | Amanda Henderson  |         |
| ~                       | ~                          | Andrew Herridge   |         |
| ~                       | ~                          | Ben Hood          |         |
| ~                       | ~                          | Ann Hudson        |         |
| ~                       | ~                          | Laura Jameson     |         |
| ~                       | ~                          | Thomas Jarvis     |         |

## INVESTIGATORS AND COLLABORATORS: SITE STAFF

Staff on site delegation logs

| City              | Care_Site                       | Person_Name        | Site_PI |
|-------------------|---------------------------------|--------------------|---------|
| ~                 | ~                               | Xue Jiang          |         |
| ~                 | ~                               | Irene Jobson       |         |
| ~                 | ~                               | Mark Johnson       |         |
| ~                 | ~                               | Sunita Kholi       |         |
| ~                 | ~                               | Emma King          |         |
| ~                 | ~                               | Sunita Kollu       |         |
| ~                 | ~                               | Lavanya Mariappan  |         |
| ~                 | ~                               | Hazel Masson       |         |
| ~                 | ~                               | Peter Murphy       |         |
| ~                 | ~                               | Lesley Naik        |         |
| ~                 | ~                               | Gemma O'Neill      |         |
| ~                 | ~                               | Sarah Osborne      |         |
| ~                 | ~                               | Edgar Paez         |         |
| ~                 | ~                               | Elizabeth Reay     |         |
| ~                 | ~                               | Georgia Ross       |         |
| ~                 | ~                               | Sarah Rowling      |         |
| ~                 | ~                               | Jenny Smith        |         |
| ~                 | ~                               | Marianne Smith     |         |
| ~                 | ~                               | Naeem Soomro       |         |
| ~                 | ~                               | Carole Stobbart    |         |
| ~                 | ~                               | Julie Thohig       |         |
| ~                 | ~                               | Dianne Turner      |         |
| ~                 | ~                               | Dianne Wake        |         |
| ~                 | ~                               | Nichola Waugh      |         |
| Newport, UK       | St Mary's Hospital (Newport)    | Alison Brown       |         |
| ~                 | ~                               | Elizabeth Harrison |         |
| ~                 | ~                               | Kudingila Madhava  |         |
| ~                 | ~                               | Tracey Tidbury     |         |
| ~                 | ~                               | Cindy Whitbread    |         |
| North Shields, UK | North Tyneside General Hospital | Mark Johnson       |         |
| Northampton, UK   | Northampton General Hospital    | Rachel Gabitass    |         |
| Northwood, UK     | Mount Vernon Hospital           | Peter Hoskin       | PI      |
| ~                 | ~                               | Viwod Mullassery   | Ex-PI   |

## INVESTIGATORS AND COLLABORATORS: SITE STAFF

Staff on site delegation logs

| City | Care_Site | Person_Name          | Site_PI |
|------|-----------|----------------------|---------|
| ~    | ~         | Hamoun Rozati        | Co-I    |
| ~    | ~         | Sara Abbassi         |         |
| ~    | ~         | Mohammed Abdul-Latif |         |
| ~    | ~         | Farhan Ahmed         |         |
| ~    | ~         | Roberto Alonzi       |         |
| ~    | ~         | Nicola Anyamene      |         |
| ~    | ~         | Freya Ball           |         |
| ~    | ~         | Dolan Basak          |         |
| ~    | ~         | Rose Bell            |         |
| ~    | ~         | Neel Bhuva           |         |
| ~    | ~         | Sam Bosompem         |         |
| ~    | ~         | Jennifer Chard       |         |
| ~    | ~         | Lai Cheng Yew        |         |
| ~    | ~         | Helen Cladd          |         |
| ~    | ~         | Lucy Collins         |         |
| ~    | ~         | Janaka Cooray        |         |
| ~    | ~         | Nicola Cutmore       |         |
| ~    | ~         | Nazma Damani         |         |
| ~    | ~         | Paolo De Jesu        |         |
| ~    | ~         | Jeanette Dickson     |         |
| ~    | ~         | Kari Evans           |         |
| ~    | ~         | Jessica Finch        |         |
| ~    | ~         | Shiv Gayadeen        |         |
| ~    | ~         | Shaista Harpeer      |         |
| ~    | ~         | Olivia Hatcher       |         |
| ~    | ~         | Robert Hughes        |         |
| ~    | ~         | Rakhi Jain           |         |
| ~    | ~         | Suzanne Jenkins      |         |
| ~    | ~         | Bhanthi Kanagaratnam |         |
| ~    | ~         | Sapna Kaur           |         |
| ~    | ~         | Rachael Khong        |         |
| ~    | ~         | Joanne Kosmin        |         |
| ~    | ~         | Paulina Kowalewska   |         |

## INVESTIGATORS AND COLLABORATORS: SITE STAFF

Staff on site delegation logs

| City           | Care_Site                                    | Person_Name         | Site_PI |
|----------------|----------------------------------------------|---------------------|---------|
| ~              | ~                                            | Shakeda Lakha       |         |
| ~              | ~                                            | Sonia Li            |         |
| ~              | ~                                            | Elaine Lousley      |         |
| ~              | ~                                            | Henry Mandeville    |         |
| ~              | ~                                            | Jessica Milner      |         |
| ~              | ~                                            | Russell Moule       |         |
| ~              | ~                                            | Peter Ostler        |         |
| ~              | ~                                            | Kasia Owczarczyk    |         |
| ~              | ~                                            | Hannah Phillips     |         |
| ~              | ~                                            | Alice Ramsden       |         |
| ~              | ~                                            | Aamna Rashid        |         |
| ~              | ~                                            | Tahmina Shakil      |         |
| ~              | ~                                            | Mausam Singhera     |         |
| ~              | ~                                            | Linda Swaney        |         |
| ~              | ~                                            | David Tan           |         |
| ~              | ~                                            | Hannah Tharmalingam |         |
| ~              | ~                                            | Harsha Vara         |         |
| ~              | ~                                            | Charlotte Westbury  |         |
| ~              | ~                                            | M Williams          |         |
| ~              | ~                                            | Katie Wood          |         |
| ~              | ~                                            | David Woolf         |         |
| ~              | ~                                            | Huiqi Yang          |         |
| ~              | ~                                            | Lai-Cheng Yew       |         |
| ~              | ~                                            | Kent Yip            |         |
| ~              | ~                                            | Claire Zane         |         |
| Nottingham, UK | Nottingham University Hospitals, City Campus | Santhanam Sundar    | PI      |
| ~              | ~                                            | Sadia Abdullah      | Co-I    |
| ~              | ~                                            | Eliot Chadwick      | Co-I    |
| ~              | ~                                            | Junhao Lim          | Co-I    |
| ~              | ~                                            | Rohan Tharaka       | Co-I    |
| ~              | ~                                            | Georgina Walker     | Co-I    |
| ~              | ~                                            | Leanne Alder        |         |
| ~              | ~                                            | Alex Blades         |         |

## INVESTIGATORS AND COLLABORATORS: SITE STAFF

Staff on site delegation logs

| City | Care_Site | Person_Name         | Site_PI |
|------|-----------|---------------------|---------|
| ~    | ~         | Matthew Brazkiewicz |         |
| ~    | ~         | Louise Brookes      |         |
| ~    | ~         | Katie Carter        |         |
| ~    | ~         | Rena Chauhan        |         |
| ~    | ~         | Rachael Chivers     |         |
| ~    | ~         | Chin Chong          |         |
| ~    | ~         | Owen Cole           |         |
| ~    | ~         | Jade Eggleton       |         |
| ~    | ~         | Susan Elliott       |         |
| ~    | ~         | Charlotte Ellis     |         |
| ~    | ~         | Carol Gooch         |         |
| ~    | ~         | Stacey Green        |         |
| ~    | ~         | Lucy Howard         |         |
| ~    | ~         | Camille Hutchinson  |         |
| ~    | ~         | Daniel Kumar        |         |
| ~    | ~         | Adele Malson        |         |
| ~    | ~         | Jamie Mills         |         |
| ~    | ~         | Kayleigh Mills      |         |
| ~    | ~         | Kathryn Moore       |         |
| ~    | ~         | Asmaa Sa Omer       |         |
| ~    | ~         | Maeve Pomeroy       |         |
| ~    | ~         | Tin Sang-Tsang      |         |
| ~    | ~         | Daniel Saunders     |         |
| ~    | ~         | Ian Sayers          |         |
| ~    | ~         | Ewan Shawcroft      |         |
| ~    | ~         | Tania Slater        |         |
| ~    | ~         | Anita Stevenson     |         |
| ~    | ~         | Phillipa Sum        |         |
| ~    | ~         | Jacob Szolin-Jones  |         |
| ~    | ~         | Sarah Taylor        |         |
| ~    | ~         | Rohan Tharakan      |         |
| ~    | ~         | Hannah Thurlow      |         |
| ~    | ~         | Caitlin Todd        |         |

## INVESTIGATORS AND COLLABORATORS: SITE STAFF

Staff on site delegation logs

| City         | Care_Site             | Person_Name      | Site_PI |
|--------------|-----------------------|------------------|---------|
| ~            | ~                     | Sarah Widdowson  |         |
| Nuneaton, UK | George Eliot Hospital | Yakhub Khan      | PI      |
| ~            | ~                     | Inderjit Atwal   |         |
| ~            | ~                     | Jacob Bourne     |         |
| ~            | ~                     | Andrew Chan      |         |
| ~            | ~                     | Rachel Fergusson |         |
| ~            | ~                     | Sarah Fergusson  |         |
| ~            | ~                     | Kerry Flahive    |         |
| ~            | ~                     | Jessica Gunn     |         |
| ~            | ~                     | Michaela Hill    |         |
| ~            | ~                     | Pritpal Klear    |         |
| ~            | ~                     | Jeanette Knapp   |         |
| ~            | ~                     | Judith Lake      |         |
| ~            | ~                     | Holly Lawrence   |         |
| ~            | ~                     | Alison McCallum  |         |
| ~            | ~                     | Andrea Mills     |         |
| ~            | ~                     | Albert Misleng   |         |
| ~            | ~                     | Sabiya Nasima    |         |
| ~            | ~                     | Rachael Oates    |         |
| ~            | ~                     | Winni Singh      |         |
| ~            | ~                     | Melanie Taylor   |         |
| ~            | ~                     | Andrew White     |         |
| ~            | ~                     | Jenna Williams   |         |
| Oldham, UK   | Royal Oldham Hospital | Ruth Conroy      | PI      |
| ~            | ~                     | Ananya Choudhury | Co-I    |
| ~            | ~                     | Parth Desai      | Co-I    |
| ~            | ~                     | Ehab Ibrahim     | Co-I    |
| ~            | ~                     | Shaveta Mehta    | Co-I    |
| ~            | ~                     | Anna Tran        | Co-I    |
| ~            | ~                     | Mohammad Abutarb |         |
| ~            | ~                     | Joanne Allsop    |         |
| ~            | ~                     | Hadia Ashraf     |         |
| ~            | ~                     | Suzanne Bland    |         |

## INVESTIGATORS AND COLLABORATORS: SITE STAFF

Staff on site delegation logs

| City       | Care_Site          | Person_Name           | Site_PI |
|------------|--------------------|-----------------------|---------|
| ~          | ~                  | Wendy Cook            |         |
| ~          | ~                  | Anthea Cree           |         |
| ~          | ~                  | Kanal Gupta           |         |
| ~          | ~                  | Ruth Halford          |         |
| ~          | ~                  | Terence Hinton        |         |
| ~          | ~                  | Shabaz Hussain        |         |
| ~          | ~                  | Joanne Johnson        |         |
| ~          | ~                  | Dawn Johnstone        |         |
| ~          | ~                  | Richard Jones         |         |
| ~          | ~                  | Helen Joyce           |         |
| ~          | ~                  | Stephen Kennedy       |         |
| ~          | ~                  | Victoria Lavin        |         |
| ~          | ~                  | Mark Livingstone      |         |
| ~          | ~                  | Jacqueline Livsey     |         |
| ~          | ~                  | Peter Mbanu           |         |
| ~          | ~                  | Jemma McLaughlin      |         |
| ~          | ~                  | Leena Mistry          |         |
| ~          | ~                  | Udeme Ohia            |         |
| ~          | ~                  | Anna Pracz            |         |
| ~          | ~                  | Kamala Ramatar        |         |
| ~          | ~                  | Joanne Reed           |         |
| ~          | ~                  | Agata Rembielak       |         |
| ~          | ~                  | Dellesa Robinson      |         |
| ~          | ~                  | Lyndsay Scarratt      |         |
| ~          | ~                  | Shazril Imran Shaukat |         |
| ~          | ~                  | Amy Slack             |         |
| ~          | ~                  | Kirstie Smith         |         |
| ~          | ~                  | Hwoeifen Soohoo       |         |
| ~          | ~                  | Richard Walshaw       |         |
| Oxford, UK | Churchill Hospital | Andrew Protheroe      | PI      |
| ~          | ~                  | Daniel Ajzensztejn    | Co-I    |
| ~          | ~                  | Gerard Andrade        | Co-I    |
| ~          | ~                  | Philip Camilleri      | Co-I    |

## INVESTIGATORS AND COLLABORATORS: SITE STAFF

Staff on site delegation logs

| City | Care_Site | Person_Name               | Site_PI |
|------|-----------|---------------------------|---------|
| ~    | ~         | Meenali Chitnis           | Co-I    |
| ~    | ~         | David J Cole              | Co-I    |
| ~    | ~         | Benjamin Fairfax          | Co-I    |
| ~    | ~         | Avinash Gupta             | Co-I    |
| ~    | ~         | Katherine Hyde            | Co-I    |
| ~    | ~         | Ami Sabharwal             | Co-I    |
| ~    | ~         | Robert Stuart             | Co-I    |
| ~    | ~         | Gemma Austin (nee Glover) |         |
| ~    | ~         | Magdalena Benysek         |         |
| ~    | ~         | Lauren Booker             |         |
| ~    | ~         | Jane Boutflower           |         |
| ~    | ~         | Rosita Broderick          |         |
| ~    | ~         | Leigh Burns               |         |
| ~    | ~         | Anju Chalin               |         |
| ~    | ~         | Henry Chesson             |         |
| ~    | ~         | Richard Cousins           |         |
| ~    | ~         | Charlotte Davies          |         |
| ~    | ~         | Hugo De La Pena           |         |
| ~    | ~         | Ana De Veciana            |         |
| ~    | ~         | Jane Gibbard              |         |
| ~    | ~         | Will Goodman              |         |
| ~    | ~         | Trish Green               |         |
| ~    | ~         | Tessa Greenhalgh          |         |
| ~    | ~         | Elizabeth Hadley          |         |
| ~    | ~         | Silke Hahnwald            |         |
| ~    | ~         | Rachel Hart               |         |
| ~    | ~         | Katherine Jacob           |         |
| ~    | ~         | Patrycja Jastrzebska      |         |
| ~    | ~         | Evanthia Komninidou       |         |
| ~    | ~         | Sarah Lawrey              |         |
| ~    | ~         | Sarah Markus              |         |
| ~    | ~         | Kerrie Marston            |         |
| ~    | ~         | Paul Colin Miller         |         |



## INVESTIGATORS AND COLLABORATORS: SITE STAFF

Staff on site delegation logs

| City        | Care_Site                | Person_Name             | Site_PI |
|-------------|--------------------------|-------------------------|---------|
| ~           | ~                        | Matthew Mooney          |         |
| ~           | ~                        | Sandra Mukkath          |         |
| ~           | ~                        | Ann Murphy              |         |
| ~           | ~                        | Julie Pinder            |         |
| ~           | ~                        | Mark Prentice           |         |
| ~           | ~                        | Thinn Pwint             |         |
| ~           | ~                        | Laura Robledo           |         |
| ~           | ~                        | Naveen Sankighatta      |         |
| ~           | ~                        | Elaine Sugden           |         |
| ~           | ~                        | Swapna Thummala         |         |
| ~           | ~                        | Mark Tuthill            |         |
| ~           | ~                        | Usharani Devi Wahengbam |         |
| ~           | ~                        | James Wakelin           |         |
| ~           | ~                        | Robert Watson           |         |
| ~           | ~                        | Sandie Wellman          |         |
| ~           | ~                        | Kelly Wigglesworth      |         |
| ~           | ~                        | Jo Wilson               |         |
| ~           | ~                        | Martha Woodward         |         |
| ~           | ~                        | Simon Wyatt             |         |
| ~           | ~                        | Hazel Wynn              |         |
| Paisley, UK | Royal Alexandra Hospital | Tiago Rodrigues         |         |
| Poole, UK   | Poole Hospital           | Sue Brock               | PI      |
| ~           | ~                        | Perric Crellin          | Co-I    |
| ~           | ~                        | Joseph Davies           | Co-I    |
| ~           | ~                        | Yogesh Nishchal         | Co-I    |
| ~           | ~                        | Neal Beamish            |         |
| ~           | ~                        | Hilary Blaney           |         |
| ~           | ~                        | Deryck Burton           |         |
| ~           | ~                        | Felicity Clapp          |         |
| ~           | ~                        | Elizabeth Clarke        |         |
| ~           | ~                        | Teresa Coffin           |         |
| ~           | ~                        | Joe Davies              |         |
| ~           | ~                        | Nichola Downs           |         |

## INVESTIGATORS AND COLLABORATORS: SITE STAFF

Staff on site delegation logs

| City           | Care_Site                | Person_Name        | Site_PI |
|----------------|--------------------------|--------------------|---------|
| ~              | ~                        | Savina Elitova     |         |
| ~              | ~                        | Maxine Flubacher   |         |
| ~              | ~                        | Sally Gillespie    |         |
| ~              | ~                        | Louise Heckford    |         |
| ~              | ~                        | Amanda Iskender    |         |
| ~              | ~                        | Lyn Jackson        |         |
| ~              | ~                        | Stephanie Jones    |         |
| ~              | ~                        | May Lwin           |         |
| ~              | ~                        | Fiona Mellor       |         |
| ~              | ~                        | Sally Munden       |         |
| ~              | ~                        | Kate Mutendera     |         |
| ~              | ~                        | Sara Orford        |         |
| ~              | ~                        | Sarah Patch        |         |
| ~              | ~                        | Sharon Power       |         |
| ~              | ~                        | Sandy Pressdee     |         |
| ~              | ~                        | Sophie Rix         |         |
| ~              | ~                        | Susan Saxby        |         |
| ~              | ~                        | Lee Tbaily         |         |
| ~              | ~                        | Becky Troke        |         |
| ~              | ~                        | Kate Urquhart      |         |
| ~              | ~                        | Craig Vincent      |         |
| ~              | ~                        | Emma Wesley        |         |
| ~              | ~                        | Roger Wheelwright  |         |
| ~              | ~                        | Delia Whiteman     |         |
| ~              | ~                        | Emma Williams      |         |
| ~              | ~                        | Elizabeth Woodward |         |
| ~              | ~                        | Seonaid Wright     |         |
| Portadown, UK  | Craigavon Area Hospital  | Judith Carser      | PI      |
| ~              | ~                        | Fionnuala Houghton | Co-I    |
| ~              | ~                        | Leanne McCourt     |         |
| Portsmouth, UK | Queen Alexandra Hospital | Joanna Gale        | PI      |
| ~              | ~                        | Shyamkia Acharige  | Co-I    |
| ~              | ~                        | Oluwatobi Adeagbo  | Co-I    |

## INVESTIGATORS AND COLLABORATORS: SITE STAFF

Staff on site delegation logs

| City | Care_Site | Person_Name         | Site_PI |
|------|-----------|---------------------|---------|
| ~    | ~         | Giuseppe Banna      | Co-I    |
| ~    | ~         | Joanna Hack         | Co-I    |
| ~    | ~         | Harliana Mohd Yusof | Co-I    |
| ~    | ~         | Syed Shah           | Co-I    |
| ~    | ~         | Jillian Andrews     |         |
| ~    | ~         | Kathy Blight        |         |
| ~    | ~         | Daniel Bloomfield   |         |
| ~    | ~         | Jack Broadfoot      |         |
| ~    | ~         | Tracy Callen        |         |
| ~    | ~         | Caroline Chau       |         |
| ~    | ~         | Jeng Heng Ching     |         |
| ~    | ~         | Heather Cuell       |         |
| ~    | ~         | Alisha Damani       |         |
| ~    | ~         | Charlotte Davies    |         |
| ~    | ~         | Tracey Dobson       |         |
| ~    | ~         | Sarah Ellis         |         |
| ~    | ~         | Wendy Golding       |         |
| ~    | ~         | Mya Gyi             |         |
| ~    | ~         | Jennifer Hale       |         |
| ~    | ~         | Dominic Hodgson     |         |
| ~    | ~         | Chloe Holden        |         |
| ~    | ~         | Joni Howells        |         |
| ~    | ~         | Eleanor Jones       |         |
| ~    | ~         | Robert Keating      |         |
| ~    | ~         | Kudingila Madhava   |         |
| ~    | ~         | Nataliya Martynyuk  |         |
| ~    | ~         | Lorna Meadows       |         |
| ~    | ~         | Badriyya Mohamedali |         |
| ~    | ~         | Yoodhvir Nagar      |         |
| ~    | ~         | Mark Noble          |         |
| ~    | ~         | Mila Roca           |         |
| ~    | ~         | Megan Rowley        |         |
| ~    | ~         | Wendy Stacey        |         |

## INVESTIGATORS AND COLLABORATORS: SITE STAFF

Staff on site delegation logs

| City        | Care_Site              | Person_Name           | Site_PI |
|-------------|------------------------|-----------------------|---------|
| ~           | ~                      | Anna Stephenson       |         |
| ~           | ~                      | Azarel Virgo          |         |
| ~           | ~                      | Mary Wands            |         |
| ~           | ~                      | Catrin Watkinson      |         |
| ~           | ~                      | Alice White           |         |
| ~           | ~                      | Robert Williams       |         |
| Preston, UK | Royal Preston Hospital | Alison Birtle         | PI      |
| ~           | ~                      | Natalie Charnley      | Co-I    |
| ~           | ~                      | Nicola Flaum          | Co-I    |
| ~           | ~                      | Christina Hague       | Co-I    |
| ~           | ~                      | Duleer Majeed         | Co-I    |
| ~           | ~                      | Omi Parikh            | Co-I    |
| ~           | ~                      | Sophie Raby           | Co-I    |
| ~           | ~                      | Jose Rico             | Co-I    |
| ~           | ~                      | Yee Pei Song          | Co-I    |
| ~           | ~                      | Marcus Wise           | Co-I    |
| ~           | ~                      | Amanda Alty           |         |
| ~           | ~                      | Nafisa Arden          |         |
| ~           | ~                      | Mandy Armstrong       |         |
| ~           | ~                      | Andrea Ashton         |         |
| ~           | ~                      | Katherine Ashton      |         |
| ~           | ~                      | Hazel Aston           |         |
| ~           | ~                      | David Barber          |         |
| ~           | ~                      | Margaret Brunton      |         |
| ~           | ~                      | Shelia Calvert        |         |
| ~           | ~                      | Claire Corless        |         |
| ~           | ~                      | Stephanie Cornthwaite |         |
| ~           | ~                      | William Croxford      |         |
| ~           | ~                      | Sharon Curran         |         |
| ~           | ~                      | Falalu Danwata        |         |
| ~           | ~                      | Rose Ellard           |         |
| ~           | ~                      | Davide Garau          |         |
| ~           | ~                      | Cassandra Gleeson     |         |

## INVESTIGATORS AND COLLABORATORS: SITE STAFF

Staff on site delegation logs

| City        | Care_Site                | Person_Name              | Site_PI |
|-------------|--------------------------|--------------------------|---------|
| ~           | ~                        | Shahzad Gul              |         |
| ~           | ~                        | Caroline Hatch           |         |
| ~           | ~                        | Billy Hefferon           |         |
| ~           | ~                        | Claire Hennigan          |         |
| ~           | ~                        | Louise Hough             |         |
| ~           | ~                        | Haiyan Huang             |         |
| ~           | ~                        | Deepsi Khatiwada         |         |
| ~           | ~                        | Patricia Knight          |         |
| ~           | ~                        | Anna Macpherson          |         |
| ~           | ~                        | Andrew Martyniak         |         |
| ~           | ~                        | Dominic Mounsey          |         |
| ~           | ~                        | Tanmay Mukhopadhyay      |         |
| ~           | ~                        | Hemant Patel             |         |
| ~           | ~                        | Hazel Preston            |         |
| ~           | ~                        | Sarah Preston            |         |
| ~           | ~                        | Christina Robinson       |         |
| ~           | ~                        | Roy Shentall             |         |
| ~           | ~                        | Norma Sidek              |         |
| ~           | ~                        | Win Soe                  |         |
| ~           | ~                        | Martin Swinton           |         |
| ~           | ~                        | Catherine Thompson       |         |
| ~           | ~                        | Nina Vekaria             |         |
| ~           | ~                        | Catherine Walmsley       |         |
| ~           | ~                        | Rebecca Wilby (nee Hall) |         |
| ~           | ~                        | Deborah Williamson       |         |
| Reading, UK | Royal Berkshire Hospital | Paul Rogers              | PI      |
| ~           | ~                        | Osamah Al-Asadi          | Co-I    |
| ~           | ~                        | Rowena Cazalet           | Co-I    |
| ~           | ~                        | Rebecca Johnson          | Co-I    |
| ~           | ~                        | Ali Abbas                |         |
| ~           | ~                        | Abdolnasser Aminiraouf   |         |
| ~           | ~                        | Jane Atkinson            |         |
| ~           | ~                        | Gabrielle Ball           |         |

## INVESTIGATORS AND COLLABORATORS: SITE STAFF

Staff on site delegation logs

| City | Care_Site | Person_Name                 | Site_PI |
|------|-----------|-----------------------------|---------|
| ~    | ~         | Gagan Bhatnagar             |         |
| ~    | ~         | Richard B Brown             |         |
| ~    | ~         | Debbie Cartwright           |         |
| ~    | ~         | James Church                |         |
| ~    | ~         | Claire Connolly             |         |
| ~    | ~         | Kristy Coomber              |         |
| ~    | ~         | Nicola Dallas               |         |
| ~    | ~         | Catherine Deytrikh-Smith    |         |
| ~    | ~         | Juliette Dye                |         |
| ~    | ~         | Shawn Ellis                 |         |
| ~    | ~         | Fiona Everson               |         |
| ~    | ~         | Suzanne Foxwell             |         |
| ~    | ~         | Maxine Gauntlett            |         |
| ~    | ~         | Anna Gillham                |         |
| ~    | ~         | Sanita Gurm                 |         |
| ~    | ~         | Royda Hadi                  |         |
| ~    | ~         | Silke Hahnwald              |         |
| ~    | ~         | Jo Hand                     |         |
| ~    | ~         | Elizabeth Haydon            |         |
| ~    | ~         | Kirsty Horwood              |         |
| ~    | ~         | Allison Hunt                |         |
| ~    | ~         | Sian James                  |         |
| ~    | ~         | Phillipa Johnstone          |         |
| ~    | ~         | Robert Jones                |         |
| ~    | ~         | Thomas Kindley              |         |
| ~    | ~         | Wioletta Kowalczyk-Williams |         |
| ~    | ~         | Christina Lewis             |         |
| ~    | ~         | Geraldine Mason             |         |
| ~    | ~         | Sean O'Cathail              |         |
| ~    | ~         | Helen O'Donnell             |         |
| ~    | ~         | Omotola Ogunnigbo           |         |
| ~    | ~         | Tolu Okeke                  |         |
| ~    | ~         | Pooja Pabari                |         |

## INVESTIGATORS AND COLLABORATORS: SITE STAFF

Staff on site delegation logs

| City         | Care_Site                  | Person_Name            | Site_PI |
|--------------|----------------------------|------------------------|---------|
| ~            | ~                          | Stephen Parr           |         |
| ~            | ~                          | Kate Preston           |         |
| ~            | ~                          | Helen Purdon           |         |
| ~            | ~                          | Norma Shields          |         |
| ~            | ~                          | Georges Sinclair       |         |
| ~            | ~                          | Emma Vowell            |         |
| ~            | ~                          | Phillip Webb           |         |
| ~            | ~                          | Simon Wyatt            |         |
| ~            | ~                          | Andreia da Cruz        |         |
| Redditch, UK | Alexandra Hospital         | Lisa Capaldi           | PI      |
| ~            | ~                          | Mujtaba Syed-Khaja     | Co-I    |
| ~            | ~                          | Maggie Brown           |         |
| ~            | ~                          | Stephanie Cook         |         |
| ~            | ~                          | Jonathan Davies        |         |
| ~            | ~                          | Joanna Hamilton        |         |
| ~            | ~                          | Alison Harrison        |         |
| ~            | ~                          | Hayley Hodson          |         |
| ~            | ~                          | Jeanette Knapp         |         |
| ~            | ~                          | Bartlomeij Kurec       |         |
| ~            | ~                          | Asha Sivapalasantharam |         |
| ~            | ~                          | Helen Tranter          |         |
| ~            | ~                          | Jennifer Young         |         |
| Redhill, UK  | East Surrey Hospital       | Eva Letalova           |         |
| Romford, UK  | Oldchurch Hospital         | Neil Fisher            |         |
| Romford, UK  | Queen's Hospital (Romford) | Kathryn Tarver         | PI      |
| ~            | ~                          | Stephanie Gibbs        | Ex-PI   |
| ~            | ~                          | Amani Chowdhury        |         |
| ~            | ~                          | Dalisay Domingo        |         |
| ~            | ~                          | Parveen Dugh           |         |
| ~            | ~                          | Revanth Jannapureddy   |         |
| ~            | ~                          | Mohammed Rashid Khan   |         |
| ~            | ~                          | Helen Mackenzie        |         |
| ~            | ~                          | Tina Mills-Baldock     |         |

## INVESTIGATORS AND COLLABORATORS: SITE STAFF

Staff on site delegation logs

| City        | Care_Site              | Person_Name                 | Site_PI |
|-------------|------------------------|-----------------------------|---------|
| ~           | ~                      | Simerjyot Mudhar            |         |
| ~           | ~                      | Samuel Mugari               |         |
| ~           | ~                      | Neale O'Brien               |         |
| ~           | ~                      | Ana-Marie Pena-Remorin      |         |
| ~           | ~                      | Yousaf Razzak               |         |
| ~           | ~                      | Jonathon Shamash            |         |
| ~           | ~                      | Ramachandran Subramaniam    |         |
| Runcorn, UK | Halton Hospital        | Ian Allen                   |         |
| ~           | ~                      | Duncan Knowles              |         |
| ~           | ~                      | Carrie Lowthian             |         |
| ~           | ~                      | Rebecca Madew (nee Tinker)  |         |
| ~           | ~                      | Nemonie Marriott            |         |
| ~           | ~                      | Andrea Young                |         |
| Salford, UK | Salford Royal Hospital | Noel Clarke                 | PI      |
| ~           | ~                      | Tony Elliott                | Co-I    |
| ~           | ~                      | Euan Green                  | Co-I    |
| ~           | ~                      | Maurice Lau                 | Co-I    |
| ~           | ~                      | Anna Tran                   | Co-I    |
| ~           | ~                      | Rachael Allen               |         |
| ~           | ~                      | Angela Ashton               |         |
| ~           | ~                      | Chris Betts                 |         |
| ~           | ~                      | Nicholas Boxall             |         |
| ~           | ~                      | Richard Cowan               |         |
| ~           | ~                      | Soney Dharmaprasad          |         |
| ~           | ~                      | Claire Dickson              |         |
| ~           | ~                      | Claire Duncan (nee Keatley) |         |
| ~           | ~                      | Christine Farnworth         |         |
| ~           | ~                      | Helen Farrell               |         |
| ~           | ~                      | Kathryn Fry                 |         |
| ~           | ~                      | Siny George                 |         |
| ~           | ~                      | Kay Goulden                 |         |
| ~           | ~                      | Samia Hanif                 |         |
| ~           | ~                      | Ashley Harris               |         |



## INVESTIGATORS AND COLLABORATORS: SITE STAFF

Staff on site delegation logs

| City            | Care_Site                    | Person_Name           | Site_PI |
|-----------------|------------------------------|-----------------------|---------|
| ~               | ~                            | Leah Harter           |         |
| ~               | ~                            | Joanne Henry          |         |
| ~               | ~                            | Jason Howard          |         |
| ~               | ~                            | Jean Jellicoe         |         |
| ~               | ~                            | Richard Jones         |         |
| ~               | ~                            | Elina Jose            |         |
| ~               | ~                            | Claire Keatley        |         |
| ~               | ~                            | Sarah Kirk            |         |
| ~               | ~                            | Kieran O'Flynn        |         |
| ~               | ~                            | Anne-Marie Peers      |         |
| ~               | ~                            | Danielle Platt        |         |
| ~               | ~                            | Catherine Redshaw     |         |
| ~               | ~                            | David Shackley        |         |
| ~               | ~                            | Mark Stapleton        |         |
| ~               | ~                            | Melanie Taylor        |         |
| ~               | ~                            | Vicky Thomas          |         |
| ~               | ~                            | Cellins Vinod         |         |
| ~               | ~                            | Oliver Wadsworth      |         |
| ~               | ~                            | Jill Youd             |         |
| Scarborough, UK | Scarborough General Hospital | Mohammad Muneeb Khan  | PI      |
| ~               | ~                            | Mohan Hingorani       | Ex-PI   |
| ~               | ~                            | Simon Hawkyard        | Co-I    |
| ~               | ~                            | Khaliq Rehman         | Co-I    |
| ~               | ~                            | Alison Ames           |         |
| ~               | ~                            | Donna Anderson        |         |
| ~               | ~                            | Lisa Armitage         |         |
| ~               | ~                            | Fizzah Asif           |         |
| ~               | ~                            | Laura Barman          |         |
| ~               | ~                            | Chloe Box             |         |
| ~               | ~                            | Kevin Brame           |         |
| ~               | ~                            | Pippa Carlton-Rylance |         |
| ~               | ~                            | Courtney Cole         |         |
| ~               | ~                            | Poppy Cottrell-Howe   |         |

## INVESTIGATORS AND COLLABORATORS: SITE STAFF

Staff on site delegation logs

| City          | Care_Site            | Person_Name       | Site_PI |
|---------------|----------------------|-------------------|---------|
| ~             | ~                    | Cheryl Donne      |         |
| ~             | ~                    | Nabil El-Mahdawi  |         |
| ~             | ~                    | Arran Fletcher    |         |
| ~             | ~                    | Joanne Fletcher   |         |
| ~             | ~                    | Vic Gacek         |         |
| ~             | ~                    | Tracey Hawkes     |         |
| ~             | ~                    | Sacha Honour      |         |
| ~             | ~                    | Diana Ionita      |         |
| ~             | ~                    | Adnan Kabir       |         |
| ~             | ~                    | Sarah Kent        |         |
| ~             | ~                    | Richard Khafagy   |         |
| ~             | ~                    | Janine Mallinson  |         |
| ~             | ~                    | Russell Morgan    |         |
| ~             | ~                    | Tania Neale       |         |
| ~             | ~                    | Polly Needs       |         |
| ~             | ~                    | Anne Nunn         |         |
| ~             | ~                    | Carol Popplestone |         |
| ~             | ~                    | Ian Renwick       |         |
| ~             | ~                    | Andrew Robertson  |         |
| ~             | ~                    | Alicia Rodgers    |         |
| ~             | ~                    | Abigail Rowbotham |         |
| ~             | ~                    | Jacqui Smith      |         |
| ~             | ~                    | Rachel Spooner    |         |
| ~             | ~                    | Amie Stewart      |         |
| ~             | ~                    | Jane Taylor       |         |
| ~             | ~                    | Alison Turnbull   |         |
| ~             | ~                    | Paul Wood         |         |
| Sheffield, UK | Weston Park Hospital | Carmel Pezaro     | PI      |
| ~             | ~                    | Omar Din          | Co-I    |
| ~             | ~                    | Shabbir Rawther   | Co-I    |
| ~             | ~                    | Virgil Sivoglo    | Co-I    |
| ~             | ~                    | Jess Aldred       |         |
| ~             | ~                    | Cyper Allan       |         |

## INVESTIGATORS AND COLLABORATORS: SITE STAFF

Staff on site delegation logs

| City | Care_Site | Person_Name            | Site_PI |
|------|-----------|------------------------|---------|
| ~    | ~         | Mymoona Alzouebi       |         |
| ~    | ~         | Ryan Asher             |         |
| ~    | ~         | Lynne Ashmore          |         |
| ~    | ~         | Lucy Birch             |         |
| ~    | ~         | Joanne Bird            |         |
| ~    | ~         | Susan Bishop           |         |
| ~    | ~         | Katie Bowen            |         |
| ~    | ~         | Janet Brown            |         |
| ~    | ~         | Richard Brown          |         |
| ~    | ~         | Sarah Brown            |         |
| ~    | ~         | Roger Burkinshaw       |         |
| ~    | ~         | Chloe Clegg            |         |
| ~    | ~         | Gemma Dale             |         |
| ~    | ~         | Tathagata Das          |         |
| ~    | ~         | Julia Disney           |         |
| ~    | ~         | Linda Evans            |         |
| ~    | ~         | Catherine Ferguson     |         |
| ~    | ~         | Leigh Fiorentino       |         |
| ~    | ~         | Alexandra Firth        |         |
| ~    | ~         | Steffy George          |         |
| ~    | ~         | Kate Gibbins           |         |
| ~    | ~         | Elizabeth Hodgkinson   |         |
| ~    | ~         | Mark Holliday          |         |
| ~    | ~         | Marion Hutchinson      |         |
| ~    | ~         | Peter Kirkbride        |         |
| ~    | ~         | James Lester           |         |
| ~    | ~         | Rebecca Lomax-Allen    |         |
| ~    | ~         | Eileen Marsh           |         |
| ~    | ~         | John Martindale        |         |
| ~    | ~         | Jessica Medcalf        |         |
| ~    | ~         | Louise Murray          |         |
| ~    | ~         | Prashanth Sanganalmath |         |
| ~    | ~         | Ruta Segamogaite       |         |

## INVESTIGATORS AND COLLABORATORS: SITE STAFF

Staff on site delegation logs

| City           | Care_Site                 | Person_Name                 | Site_PI |
|----------------|---------------------------|-----------------------------|---------|
| ~              | ~                         | Roseleen Sheehan            |         |
| ~              | ~                         | Janine Smedley (nee McCabe) |         |
| ~              | ~                         | Lucy Smith                  |         |
| ~              | ~                         | Anne Smythe                 |         |
| ~              | ~                         | Catherine Spalton           |         |
| ~              | ~                         | Rachel Toes                 |         |
| ~              | ~                         | Lucy Walkington             |         |
| ~              | ~                         | Katherine Williams          |         |
| ~              | ~                         | Kim Wood                    |         |
| Shrewsbury, UK | Royal Shrewsbury Hospital | Narayanan Srihari           | PI      |
| ~              | ~                         | Ravi Prashant               | Co-I    |
| ~              | ~                         | Riquella Abbott             |         |
| ~              | ~                         | Huzeifa Abdel               |         |
| ~              | ~                         | Marion Adams                |         |
| ~              | ~                         | Beshar Allos                |         |
| ~              | ~                         | Shazad Aslam                |         |
| ~              | ~                         | Mandy Bates                 |         |
| ~              | ~                         | Erica Beaumont              |         |
| ~              | ~                         | Mandy Beekes                |         |
| ~              | ~                         | James Best                  |         |
| ~              | ~                         | Rajanee Bhana               |         |
| ~              | ~                         | Lisa Capaldi                |         |
| ~              | ~                         | Danielle Childs             |         |
| ~              | ~                         | Lisa Evans                  |         |
| ~              | ~                         | Gill Ferguson               |         |
| ~              | ~                         | Huzeifa Gadir               |         |
| ~              | ~                         | Qamar Ghafoor               |         |
| ~              | ~                         | Nicola Henderson            |         |
| ~              | ~                         | Hayley Hughes               |         |
| ~              | ~                         | Nicola Jones                |         |
| ~              | ~                         | Sanal Jose                  |         |
| ~              | ~                         | Siobhan Kilbane             |         |
| ~              | ~                         | Verity King                 |         |

## INVESTIGATORS AND COLLABORATORS: SITE STAFF

Staff on site delegation logs

| City              | Care_Site                        | Person_Name          | Site_PI |
|-------------------|----------------------------------|----------------------|---------|
| ~                 | ~                                | Sunita Kurian-Downer |         |
| ~                 | ~                                | Jenny Lakin          |         |
| ~                 | ~                                | Anna Law             |         |
| ~                 | ~                                | Gemma Lee            |         |
| ~                 | ~                                | Michael Leigh        |         |
| ~                 | ~                                | Rachel McGregor      |         |
| ~                 | ~                                | Elena Michael        |         |
| ~                 | ~                                | Helen Moore          |         |
| ~                 | ~                                | Emma Neeves          |         |
| ~                 | ~                                | Karen Nicholas       |         |
| ~                 | ~                                | Catherine Orrell     |         |
| ~                 | ~                                | Lucy Pennant         |         |
| ~                 | ~                                | Craig Pickering      |         |
| ~                 | ~                                | Suzanne Pope         |         |
| ~                 | ~                                | Sally Potts          |         |
| ~                 | ~                                | Renee Poulson        |         |
| ~                 | ~                                | Aitzaz Qaisar        |         |
| ~                 | ~                                | Catherine Santiago   |         |
| ~                 | ~                                | Gemma Searle         |         |
| ~                 | ~                                | Jenny Simm           |         |
| ~                 | ~                                | Harpreet Singh       |         |
| ~                 | ~                                | Sandra Smith         |         |
| ~                 | ~                                | Andy Taylor          |         |
| ~                 | ~                                | Alison Tilley        |         |
| ~                 | ~                                | Mathai Varghese      |         |
| ~                 | ~                                | Natasha Wallbank     |         |
| ~                 | ~                                | Emma Weaver          |         |
| ~                 | ~                                | Rebecca Wilcox       |         |
| ~                 | ~                                | Sundus Yahya         |         |
| ~                 | ~                                | Angela Yeomans       |         |
| ~                 | ~                                | Abel Zachariah       |         |
| South Shields, UK | South Tyneside District Hospital | Ashraf Azzabi        | PI      |
| ~                 | ~                                | Amy Burns            |         |

## INVESTIGATORS AND COLLABORATORS: SITE STAFF

Staff on site delegation logs

| City            | Care_Site                    | Person_Name            | Site_PI |
|-----------------|------------------------------|------------------------|---------|
| ~               | ~                            | Maxine Goldsbrough     |         |
| ~               | ~                            | Sally Hall             |         |
| ~               | ~                            | Judith Moore           |         |
| ~               | ~                            | Sue Morrison           |         |
| ~               | ~                            | Ruth Tindle            |         |
| Southampton, UK | Southampton General Hospital | Simon Crabb            | PI      |
| ~               | ~                            | Emma Brown             | Co-I    |
| ~               | ~                            | Tessa Greenhalgh       | Co-I    |
| ~               | ~                            | Chloe Holden           | Co-I    |
| ~               | ~                            | Harish Reddy           | Co-I    |
| ~               | ~                            | Caroline Andrews       |         |
| ~               | ~                            | Liane Armstrong        |         |
| ~               | ~                            | Holly Burton           |         |
| ~               | ~                            | Nikki Carney           |         |
| ~               | ~                            | Chris Coyle            |         |
| ~               | ~                            | Kirsty Cumming         |         |
| ~               | ~                            | Lucy Elswood           |         |
| ~               | ~                            | Archana Gadve          |         |
| ~               | ~                            | Julie Gwilt            |         |
| ~               | ~                            | Annelise Haskell       |         |
| ~               | ~                            | Catherine Heath        |         |
| ~               | ~                            | Julie Kennedy          |         |
| ~               | ~                            | Donna Kimber           |         |
| ~               | ~                            | Yanli Li               |         |
| ~               | ~                            | Maureen McAuley        |         |
| ~               | ~                            | Victoria McFarlane     |         |
| ~               | ~                            | Graham Mead            |         |
| ~               | ~                            | Carolyn Mitchell       |         |
| ~               | ~                            | Fabiola Morales-Azofra |         |
| ~               | ~                            | Susan Morton           |         |
| ~               | ~                            | Carina Mundy           |         |
| ~               | ~                            | Oyeleye Oyebola        |         |
| ~               | ~                            | Nikki Prewitt          |         |

## INVESTIGATORS AND COLLABORATORS: SITE STAFF

Staff on site delegation logs

| City                   | Care_Site                                      | Person_Name             | Site_PI |
|------------------------|------------------------------------------------|-------------------------|---------|
| ~                      | ~                                              | Leanne Reader           |         |
| ~                      | ~                                              | Rebecca Rice            |         |
| ~                      | ~                                              | Adele Ruiz              |         |
| ~                      | ~                                              | Lorraine Street         |         |
| ~                      | ~                                              | Sau-Mon Tsang           |         |
| ~                      | ~                                              | Shauna Wakefield        |         |
| ~                      | ~                                              | Matthew Wheeler         |         |
| ~                      | ~                                              | Aneta Zahorska          |         |
| Southport, UK          | Southport and Formby District General Hospital | Manal Alameddine        | PI      |
| ~                      | ~                                              | Neeraj Bhalla           | Ex-PI   |
| ~                      | ~                                              | Dawn Barker             |         |
| ~                      | ~                                              | Margaret Brunton        |         |
| ~                      | ~                                              | Lisa Dobson (nee Child) |         |
| ~                      | ~                                              | Chinnamani Eswar        |         |
| ~                      | ~                                              | Ken Gardner             |         |
| ~                      | ~                                              | Julie Griffiths         |         |
| ~                      | ~                                              | Laurie Lomax            |         |
| ~                      | ~                                              | Marie McBride           |         |
| ~                      | ~                                              | Teresa Monahan          |         |
| ~                      | ~                                              | Heidi Moran             |         |
| ~                      | ~                                              | Anna Morris             |         |
| ~                      | ~                                              | Sandra Robinson         |         |
| ~                      | ~                                              | Linda Schinkel          |         |
| ~                      | ~                                              | Angela Scullion         |         |
| ~                      | ~                                              | Asha Sivapalasantharam  |         |
| ~                      | ~                                              | Ann Wearing             |         |
| St Leonards-on-Sea, UK | Conquest Hospital                              | Caroline Manetta        | PI      |
| ~                      | ~                                              | Atikah Ayaz             |         |
| ~                      | ~                                              | Theresa Baumber         |         |
| ~                      | ~                                              | Sharon Beesley          |         |
| ~                      | ~                                              | Sarah Draper            |         |
| ~                      | ~                                              | Steve Garnett           |         |
| ~                      | ~                                              | Duncan Gilbert          |         |

## INVESTIGATORS AND COLLABORATORS: SITE STAFF

Staff on site delegation logs

| City          | Care_Site       | Person_Name       | Site_PI |
|---------------|-----------------|-------------------|---------|
| ~             | ~               | Sarah Goodwin     |         |
| ~             | ~               | Joanna Howard     |         |
| ~             | ~               | Kay Jones-Skipper |         |
| ~             | ~               | Kathryn Lees      |         |
| ~             | ~               | Lauren McCrisken  |         |
| ~             | ~               | Fiona McKinna     |         |
| ~             | ~               | Roger Plail       |         |
| ~             | ~               | Gail Pottinger    |         |
| ~             | ~               | Aspasia Soultati  |         |
| ~             | ~               | Jo-Anne Taylor    |         |
| ~             | ~               | Mark Whitfield    |         |
| Stevenage, UK | Lister Hospital | Robert Hughes     | PI      |
| ~             | ~               | Stephen Almond    |         |
| ~             | ~               | Anna Anosova      |         |
| ~             | ~               | Alkhalidi Ashraf  |         |
| ~             | ~               | Mawuelikem Assoku |         |
| ~             | ~               | Corinne Bradshaw  |         |
| ~             | ~               | Clare Collins     |         |
| ~             | ~               | Sura Dabbagh      |         |
| ~             | ~               | Martin Ebon       |         |
| ~             | ~               | Jemma Gilmore     |         |
| ~             | ~               | Sunita Gohil      |         |
| ~             | ~               | Vicky Hills       |         |
| ~             | ~               | Rachel Low        |         |
| ~             | ~               | Leena Mukherjee   |         |
| ~             | ~               | Sayyida Nembhard  |         |
| ~             | ~               | Nikhil Oommen     |         |
| ~             | ~               | Katie Poole       |         |
| ~             | ~               | Natalie Rahim     |         |
| ~             | ~               | Anita Rana        |         |
| ~             | ~               | Roisin Schimmel   |         |
| ~             | ~               | Jonathan Towler   |         |
| ~             | ~               | Alice Valle       |         |



## INVESTIGATORS AND COLLABORATORS: SITE STAFF

Staff on site delegation logs

| City          | Care_Site              | Person_Name                | Site_PI |
|---------------|------------------------|----------------------------|---------|
| ~             | ~                      | David Ward                 |         |
| ~             | ~                      | Steven Watkins             |         |
| ~             | ~                      | Elen Witness               |         |
| ~             | ~                      | David Woolf                |         |
| Stockport, UK | Stepping Hill Hospital | John Logue                 | PI      |
| ~             | ~                      | Adebanji Adeyoju           |         |
| ~             | ~                      | Wasim Akhtar               |         |
| ~             | ~                      | Carmel Anandadas           |         |
| ~             | ~                      | Eleanor Anscombe           |         |
| ~             | ~                      | Miriam Avery               |         |
| ~             | ~                      | Paul Berry                 |         |
| ~             | ~                      | Aelens Brauckman           |         |
| ~             | ~                      | Stephen Bromage            |         |
| ~             | ~                      | Richard Brough             |         |
| ~             | ~                      | Louise Brown               |         |
| ~             | ~                      | Stephen CW Brown           |         |
| ~             | ~                      | Jean Cheetham              |         |
| ~             | ~                      | Pat Clitheroe              |         |
| ~             | ~                      | Tracie Cocks               |         |
| ~             | ~                      | Gerald Collins             |         |
| ~             | ~                      | Sarah Connolly nee McKenna |         |
| ~             | ~                      | Sam Corcoran               |         |
| ~             | ~                      | Catherine Coyle            |         |
| ~             | ~                      | Catherine Fox              |         |
| ~             | ~                      | Christina Gilmour          |         |
| ~             | ~                      | Emma Goodwin               |         |
| ~             | ~                      | Susan Graham               |         |
| ~             | ~                      | Umi Hatimy                 |         |
| ~             | ~                      | Helen Haydock              |         |
| ~             | ~                      | Nicola Hermitage           |         |
| ~             | ~                      | Emma Hewitt                |         |
| ~             | ~                      | Sheila Hodgkinson          |         |
| ~             | ~                      | Susan Hopkins              |         |

## INVESTIGATORS AND COLLABORATORS: SITE STAFF

Staff on site delegation logs

| City                 | Care_Site                         | Person_Name            | Site_PI |
|----------------------|-----------------------------------|------------------------|---------|
| ~                    | ~                                 | Apurna Jegannathen     |         |
| ~                    | ~                                 | Zoe Jordan             |         |
| ~                    | ~                                 | Anna Kellingray        |         |
| ~                    | ~                                 | Alissa Kent            |         |
| ~                    | ~                                 | John Kilmartin         |         |
| ~                    | ~                                 | Magda Kujawa           |         |
| ~                    | ~                                 | Abigail Mackley        |         |
| ~                    | ~                                 | Patrick O'Reilly       |         |
| ~                    | ~                                 | Oluwademilade Odewumi  |         |
| ~                    | ~                                 | Lucy Orrell            |         |
| ~                    | ~                                 | Abigail Pemberton      |         |
| ~                    | ~                                 | Benjamin Ralphs        |         |
| ~                    | ~                                 | Mkyla Reilly           |         |
| ~                    | ~                                 | David Ross             |         |
| ~                    | ~                                 | Andrew Sinclair        |         |
| ~                    | ~                                 | Emma Taylor            |         |
| ~                    | ~                                 | Jill Taylor            |         |
| ~                    | ~                                 | Satish Venkateshan     |         |
| ~                    | ~                                 | Katrina Wade           |         |
| ~                    | ~                                 | Jonathan Wong          |         |
| ~                    | ~                                 | Donald van Welsenens   |         |
| Stockton-on-Tees, UK | North Tees General Hospital       | Devadasan Shakespeare  |         |
| Stockton-on-Tees, UK | University Hospital of North Tees | Darren Leaning         | PI      |
| ~                    | ~                                 | Alison Chilvers        |         |
| ~                    | ~                                 | Helen Dunn (nee Carey) |         |
| ~                    | ~                                 | Emma Jameson           |         |
| ~                    | ~                                 | Hyder Latif            |         |
| ~                    | ~                                 | Abdul Mian             |         |
| ~                    | ~                                 | Victor Palit           |         |
| ~                    | ~                                 | Moira Percival         |         |
| ~                    | ~                                 | Sarah Pitcairn         |         |
| ~                    | ~                                 | Leigh Pollard          |         |
| ~                    | ~                                 | Lynda Poole            |         |

## INVESTIGATORS AND COLLABORATORS: SITE STAFF

Staff on site delegation logs

| City               | Care_Site                       | Person_Name               | Site_PI |
|--------------------|---------------------------------|---------------------------|---------|
| ~                  | ~                               | Pam Race                  |         |
| ~                  | ~                               | Devadasan Shakespeare     |         |
| ~                  | ~                               | Andrew Sigsworth          |         |
| ~                  | ~                               | Helen Wardle (nee Wilson) |         |
| ~                  | ~                               | Bill Wetherill            |         |
| Stoke-on-Trent, UK | Royal Stoke University Hospital | Salil Vengalil            | PI      |
| ~                  | ~                               | Fawzi Adab                |         |
| ~                  | ~                               | Eden Ball                 |         |
| ~                  | ~                               | Rajanee Bhana             |         |
| ~                  | ~                               | Isabel Breeze             |         |
| ~                  | ~                               | Marion Evans              |         |
| ~                  | ~                               | Grace Gough               |         |
| ~                  | ~                               | Robert Green              |         |
| ~                  | ~                               | Emma Jackson              |         |
| ~                  | ~                               | Christopher Luscombe      |         |
| ~                  | ~                               | Alison Myatt              |         |
| ~                  | ~                               | Katrina Parkinson         |         |
| ~                  | ~                               | Angela Peake              |         |
| ~                  | ~                               | Sharon Rollison           |         |
| ~                  | ~                               | Elizabeth Sellars         |         |
| ~                  | ~                               | Rowena Smith              |         |
| ~                  | ~                               | Julie Storer              |         |
| ~                  | ~                               | Alison Tute               |         |
| ~                  | ~                               | Liberty Verueco           |         |
| ~                  | ~                               | Angela Ward               |         |
| ~                  | ~                               | Elizabeth Williamson      |         |
| Sunderland, UK     | Sunderland Royal Hospital       | Ashraf Azzabi             | PI      |
| ~                  | ~                               | Rachel Pearson            | Co-I    |
| ~                  | ~                               | Ian Pedley                | Co-I    |
| ~                  | ~                               | Kathryn Wright            | Co-I    |
| ~                  | ~                               | Rod Beard                 |         |
| ~                  | ~                               | Stephen Butler            |         |
| ~                  | ~                               | Jane Cole                 |         |

## INVESTIGATORS AND COLLABORATORS: SITE STAFF

Staff on site delegation logs

| City                 | Care_Site                       | Person_Name         | Site_PI |
|----------------------|---------------------------------|---------------------|---------|
| ~                    | ~                               | Michelle Edwards    |         |
| ~                    | ~                               | Terri Haldane       |         |
| ~                    | ~                               | Christine Harle     |         |
| ~                    | ~                               | Amanda Howey        |         |
| ~                    | ~                               | Vivienne Hullock    |         |
| ~                    | ~                               | Shahid Iqbal        |         |
| ~                    | ~                               | Stephen Laybourne   |         |
| ~                    | ~                               | Paula Newton        |         |
| ~                    | ~                               | Julia Scott         |         |
| ~                    | ~                               | Karen Shield        |         |
| ~                    | ~                               | Fiona Wakinshaw     |         |
| Sutton Coldfield, UK | Good Hope Hospital              | Daniel Ford         | PI      |
| ~                    | ~                               | Mark O'Beirn        | Co-I    |
| ~                    | ~                               | Kamaldeep Ajimal    |         |
| ~                    | ~                               | Shobit Bajjal       |         |
| ~                    | ~                               | Chen Bartlett       |         |
| ~                    | ~                               | Ellen Drew          |         |
| ~                    | ~                               | Steve Hay           |         |
| ~                    | ~                               | Lubna Khan          |         |
| ~                    | ~                               | Alison Maidment     |         |
| ~                    | ~                               | Beena Mistry        |         |
| ~                    | ~                               | Katy Moore          |         |
| ~                    | ~                               | Rachael O'Beney     |         |
| ~                    | ~                               | Janet Prentice      |         |
| ~                    | ~                               | Sarah Rogers        |         |
| ~                    | ~                               | Sundip Sohanpal     |         |
| ~                    | ~                               | Lorna Swaddle       |         |
| ~                    | ~                               | Helen Taylor        |         |
| ~                    | ~                               | Helen Thomas        |         |
| ~                    | ~                               | James Whitehouse    |         |
| Sutton, UK           | Royal Marsden Hospital (Sutton) | Chris Parker        | PI      |
| ~                    | ~                               | Douglas Brand       | Co-I    |
| ~                    | ~                               | Angela Pathmanathan | Co-I    |

## INVESTIGATORS AND COLLABORATORS: SITE STAFF

Staff on site delegation logs

| City | Care_Site | Person_Name        | Site_PI |
|------|-----------|--------------------|---------|
| ~    | ~         | Nora Sundahl       | Co-I    |
| ~    | ~         | Fatima Ahmed       |         |
| ~    | ~         | Rookmeen Alighan   |         |
| ~    | ~         | Eva Batovska       |         |
| ~    | ~         | Martha Bullimore   |         |
| ~    | ~         | Sue Cromarty       |         |
| ~    | ~         | Claire Crowley     |         |
| ~    | ~         | Kirsty Cuthbertson |         |
| ~    | ~         | David Dearnaley    |         |
| ~    | ~         | Rosalind Eeles     |         |
| ~    | ~         | Lucy Featherstone  |         |
| ~    | ~         | Janine Flohr       |         |
| ~    | ~         | Amir El Ghazal     |         |
| ~    | ~         | Zaynah Gurreebun   |         |
| ~    | ~         | Laura Hennelly     |         |
| ~    | ~         | Adham Hijab        |         |
| ~    | ~         | Alan Horwich       |         |
| ~    | ~         | Robert Huddart     |         |
| ~    | ~         | Nick Hunnings      |         |
| ~    | ~         | Tiaan Jacobs       |         |
| ~    | ~         | Bernadette Johnson |         |
| ~    | ~         | Kelly Jones        |         |
| ~    | ~         | Vincent Khoo       |         |
| ~    | ~         | Susan Lalondrelle  |         |
| ~    | ~         | Alexander Macnab   |         |
| ~    | ~         | Chloe McCormack    |         |
| ~    | ~         | Gerard McVey       |         |
| ~    | ~         | Sally Moore        |         |
| ~    | ~         | Annette Musallam   |         |
| ~    | ~         | Jenni Parmar       |         |
| ~    | ~         | Ray Shepherd       |         |
| ~    | ~         | Victoria Sjolin    |         |
| ~    | ~         | Helen Stidwell     |         |

## INVESTIGATORS AND COLLABORATORS: SITE STAFF

Staff on site delegation logs

| City                   | Care_Site            | Person_Name         | Site_PI |
|------------------------|----------------------|---------------------|---------|
| ~                      | ~                    | Alex Tan            |         |
| ~                      | ~                    | Alison Tree         |         |
| ~                      | ~                    | Ruth Woode-Amisshah |         |
| Sutton-in-Ashfield, UK | King's Mill Hospital | Georgina Walker     | PI      |
| ~                      | ~                    | Daniel Saunders     | Ex-PI   |
| ~                      | ~                    | Louise Brookes      | Co-I    |
| ~                      | ~                    | Benjamin Masters    | Co-I    |
| ~                      | ~                    | Sadia Abdullah      |         |
| ~                      | ~                    | Samantha Boam       |         |
| ~                      | ~                    | Andrew Brocklehurst |         |
| ~                      | ~                    | Jamie-Rae Burgoyne  |         |
| ~                      | ~                    | Eliot Chadwick      |         |
| ~                      | ~                    | Muhammad Gill       |         |
| ~                      | ~                    | Robert Goldspring   |         |
| ~                      | ~                    | Steve Haigh         |         |
| ~                      | ~                    | Shila Hamzpur       |         |
| ~                      | ~                    | Rebecca Holmes      |         |
| ~                      | ~                    | Lauren Jones        |         |
| ~                      | ~                    | Jun Lim             |         |
| ~                      | ~                    | Wayne Lovegrove     |         |
| ~                      | ~                    | Samantha March      |         |
| ~                      | ~                    | Victoria Moore      |         |
| ~                      | ~                    | Dominic Nash        |         |
| ~                      | ~                    | Michael Ocathail    |         |
| ~                      | ~                    | Linda Otter         |         |
| ~                      | ~                    | Andrea Palfreman    |         |
| ~                      | ~                    | James Price         |         |
| ~                      | ~                    | Lisa Rahn           |         |
| ~                      | ~                    | Wai Hou Sam         |         |
| ~                      | ~                    | Terri-Ann Sewell    |         |
| ~                      | ~                    | Sarah Shelton       |         |
| ~                      | ~                    | Katie Slack         |         |
| ~                      | ~                    | Fiona Smith         |         |

## INVESTIGATORS AND COLLABORATORS: SITE STAFF

Staff on site delegation logs

| City        | Care_Site          | Person_Name          | Site_PI |
|-------------|--------------------|----------------------|---------|
| ~           | ~                  | Susan Smith          |         |
| ~           | ~                  | Sarah Taylor         |         |
| ~           | ~                  | Elena Umbrurescu     |         |
| ~           | ~                  | Lynne Wade           |         |
| ~           | ~                  | Margaret Wheatley    |         |
| ~           | ~                  | Inez Wynter          |         |
| Swansea, UK | Singleton Hospital | Ahmed Shaheen        | PI      |
| ~           | ~                  | Rhian Davies         | Co-I    |
| ~           | ~                  | Helen Fitzgerald     | Co-I    |
| ~           | ~                  | Nia Jackson          | Co-I    |
| ~           | ~                  | Sheena Lam           | Co-I    |
| ~           | ~                  | Aijaz Lone           | Co-I    |
| ~           | ~                  | Wael Mohamed         | Co-I    |
| ~           | ~                  | Mau-Don Phan         | Co-I    |
| ~           | ~                  | Fiona Williams       | Co-I    |
| ~           | ~                  | Carl Ackland         |         |
| ~           | ~                  | Russell Banner       |         |
| ~           | ~                  | Gianfilippo Bertelli |         |
| ~           | ~                  | Lynne Breeze-Jones   |         |
| ~           | ~                  | David Brown          |         |
| ~           | ~                  | Jayne Caparros       |         |
| ~           | ~                  | Helen Cheley         |         |
| ~           | ~                  | Karen Chesters       |         |
| ~           | ~                  | Amanda Cook          |         |
| ~           | ~                  | Emma Dangerfield     |         |
| ~           | ~                  | Nicola Davies        |         |
| ~           | ~                  | Lisa Ellis           |         |
| ~           | ~                  | Elizabeth Evans      |         |
| ~           | ~                  | Stuart Evans         |         |
| ~           | ~                  | Tracey Ford          |         |
| ~           | ~                  | Alex Franklin        |         |
| ~           | ~                  | Ricky Fraser         |         |
| ~           | ~                  | Lorraine Gammon      |         |

## INVESTIGATORS AND COLLABORATORS: SITE STAFF

Staff on site delegation logs

| City | Care_Site | Person_Name                | Site_PI |
|------|-----------|----------------------------|---------|
| ~    | ~         | Sharath Gangadhara         |         |
| ~    | ~         | Judith Gooding             |         |
| ~    | ~         | Sarah Gwynne               |         |
| ~    | ~         | Emily Harris (n. Marchant) |         |
| ~    | ~         | Amanda Jackson             |         |
| ~    | ~         | Chelsea Jenkins            |         |
| ~    | ~         | Maria Johnstone            |         |
| ~    | ~         | Gillian Jones              |         |
| ~    | ~         | Lewis Jones                |         |
| ~    | ~         | Ashok Kumar                |         |
| ~    | ~         | Satish Kumar               |         |
| ~    | ~         | Donna Lear                 |         |
| ~    | ~         | Nicola Lemon               |         |
| ~    | ~         | Jason Lester               |         |
| ~    | ~         | James Morgan               |         |
| ~    | ~         | Gillian Palmer             |         |
| ~    | ~         | Angharad Phillips          |         |
| ~    | ~         | Brian Phillips             |         |
| ~    | ~         | Karen Phillips             |         |
| ~    | ~         | Susie Pitcher              |         |
| ~    | ~         | Gail Povey                 |         |
| ~    | ~         | Euan Pratt                 |         |
| ~    | ~         | Delia Pudney               |         |
| ~    | ~         | Leanne Quinn               |         |
| ~    | ~         | Amy Quinton                |         |
| ~    | ~         | Alex Richards              |         |
| ~    | ~         | Mair Roberts               |         |
| ~    | ~         | Mark Rogers                |         |
| ~    | ~         | Michelle Romano            |         |
| ~    | ~         | N Sindgi                   |         |
| ~    | ~         | Alison Stretch             |         |
| ~    | ~         | Ellen Tait                 |         |
| ~    | ~         | Katie Tanner               |         |



## INVESTIGATORS AND COLLABORATORS: SITE STAFF

Staff on site delegation logs

| City        | Care_Site              | Person_Name            | Site_PI |
|-------------|------------------------|------------------------|---------|
| ~           | ~                      | Anne Thomas            |         |
| ~           | ~                      | Nia Viney              |         |
| ~           | ~                      | John Wagstaff          |         |
| ~           | ~                      | Gillian Willetts       |         |
| ~           | ~                      | Dawn Withers           |         |
| ~           | ~                      | Naomi Woods            |         |
| ~           | ~                      | Charlotte Young        |         |
| Swindon, UK | Great Western Hospital | Omar Khan              | PI      |
| ~           | ~                      | Gerard Andrade         |         |
| ~           | ~                      | Aiste Baltramaityte    |         |
| ~           | ~                      | Rebecca Belcher        |         |
| ~           | ~                      | Graham Brown           |         |
| ~           | ~                      | Christopher Clarke     |         |
| ~           | ~                      | David J Cole           |         |
| ~           | ~                      | Amanda Colston         |         |
| ~           | ~                      | Sarah Cotton           |         |
| ~           | ~                      | Nicola Cowling         |         |
| ~           | ~                      | Shiroma De Silva-Minor |         |
| ~           | ~                      | Jan Dodge              |         |
| ~           | ~                      | Fahad Fazal            |         |
| ~           | ~                      | Victoria Gibson        |         |
| ~           | ~                      | Sarah Grayland         |         |
| ~           | ~                      | Lesley Haxton          |         |
| ~           | ~                      | Ellie Hewitt           |         |
| ~           | ~                      | Esme Hill              |         |
| ~           | ~                      | Raj Jampana            |         |
| ~           | ~                      | Ania Jones             |         |
| ~           | ~                      | Jean Kordula           |         |
| ~           | ~                      | Lynsey Kyeremeh        |         |
| ~           | ~                      | Donna Lake             |         |
| ~           | ~                      | Jonathan Lewis         |         |
| ~           | ~                      | Mike Lewis             |         |
| ~           | ~                      | Catherine Lewis Clarke |         |

## INVESTIGATORS AND COLLABORATORS: SITE STAFF

Staff on site delegation logs

| City        | Care_Site              | Person_Name                | Site_PI |
|-------------|------------------------|----------------------------|---------|
| ~           | ~                      | Sarah Long                 |         |
| ~           | ~                      | Dorothe Maramak            |         |
| ~           | ~                      | Dorota Marciniak           |         |
| ~           | ~                      | Laura McCafferty           |         |
| ~           | ~                      | Sue Meakin                 |         |
| ~           | ~                      | Aruna Medisetti            |         |
| ~           | ~                      | Rachel Messenger           |         |
| ~           | ~                      | Chanelle Meyer             |         |
| ~           | ~                      | David Newell               |         |
| ~           | ~                      | Tim Owen                   |         |
| ~           | ~                      | Debbie Palmer              |         |
| ~           | ~                      | Cerila Parajes             |         |
| ~           | ~                      | Sally-Ann Parkin (nee) Lee |         |
| ~           | ~                      | Ronak Patel                |         |
| ~           | ~                      | Suzannah Pegler            |         |
| ~           | ~                      | Caroline Pensotti          |         |
| ~           | ~                      | Tracey Sargent             |         |
| ~           | ~                      | Deborah Scott              |         |
| ~           | ~                      | Karen Smith                |         |
| ~           | ~                      | Ellen Starling             |         |
| ~           | ~                      | Joseph Stevens             |         |
| ~           | ~                      | Emma Wakefield             |         |
| ~           | ~                      | Helen Winter               |         |
| ~           | ~                      | Vivian Zinyemba            |         |
| Taunton, UK | Musgrove Park Hospital | Emma Gray                  | PI      |
| ~           | ~                      | John Graham                | Ex-PI   |
| ~           | ~                      | Nicola Cox                 | Co-I    |
| ~           | ~                      | Mohini Varughese           | Co-I    |
| ~           | ~                      | John Allinson-Smith        |         |
| ~           | ~                      | Jan Ashcroft               |         |
| ~           | ~                      | Nita Beacham               |         |
| ~           | ~                      | Hannah Berry               |         |
| ~           | ~                      | Ian Bodger                 |         |

## INVESTIGATORS AND COLLABORATORS: SITE STAFF

Staff on site delegation logs

| City | Care_Site | Person_Name         | Site_PI |
|------|-----------|---------------------|---------|
| ~    | ~         | Joanne Botten       |         |
| ~    | ~         | Lisa Bower          |         |
| ~    | ~         | Darren Brady        |         |
| ~    | ~         | Christina Branfield |         |
| ~    | ~         | Rebecca Brown       |         |
| ~    | ~         | Clair Brunner       |         |
| ~    | ~         | Richard Burgess     |         |
| ~    | ~         | Alison Chedham      |         |
| ~    | ~         | Rachel Coe          |         |
| ~    | ~         | Hayley Cornall      |         |
| ~    | ~         | Susan Crouch        |         |
| ~    | ~         | Nicola Cutmore      |         |
| ~    | ~         | Rebecca Denslow     |         |
| ~    | ~         | Jarrold Dunn        |         |
| ~    | ~         | Michelle Farrar     |         |
| ~    | ~         | Abby Farzaneh       |         |
| ~    | ~         | Simon Goldsworthy   |         |
| ~    | ~         | Fiona Goodchild     |         |
| ~    | ~         | Amanda Groves       |         |
| ~    | ~         | Clair Hinton        |         |
| ~    | ~         | Lucy Howell-Drewett |         |
| ~    | ~         | Joseph Jelski       |         |
| ~    | ~         | Odunayo Kalejaiye   |         |
| ~    | ~         | Joan Kemp           |         |
| ~    | ~         | Manjusha Keni       |         |
| ~    | ~         | Catherine Lane      |         |
| ~    | ~         | Lynn Leat           |         |
| ~    | ~         | Fen Lewen           |         |
| ~    | ~         | Angela Locke        |         |
| ~    | ~         | Ruaraidh MacDonagh  |         |
| ~    | ~         | Sue Mahoney         |         |
| ~    | ~         | Anna Masamba        |         |
| ~    | ~         | Judith Mathie       |         |

## INVESTIGATORS AND COLLABORATORS: SITE STAFF

Staff on site delegation logs

| City        | Care_Site                        | Person_Name          | Site_PI |
|-------------|----------------------------------|----------------------|---------|
| ~           | ~                                | Sara Myers           |         |
| ~           | ~                                | Sayyida Nembhard     |         |
| ~           | ~                                | Samantha Northover   |         |
| ~           | ~                                | Corinne Pawley       |         |
| ~           | ~                                | George Plataniotis   |         |
| ~           | ~                                | Ceri Poyntz-wright   |         |
| ~           | ~                                | Rebecca Purnell      |         |
| ~           | ~                                | Gihan Ratnayake      |         |
| ~           | ~                                | Guillermo Reina-Ruiz |         |
| ~           | ~                                | Joanne Rogers        |         |
| ~           | ~                                | Joy Rowe             |         |
| ~           | ~                                | Tamlyn Russell       |         |
| ~           | ~                                | Amy Sawyer           |         |
| ~           | ~                                | Alison Snell         |         |
| ~           | ~                                | Claire Sowerby       |         |
| ~           | ~                                | Luke Stephens        |         |
| ~           | ~                                | Moira Tait           |         |
| ~           | ~                                | Karen Tanner         |         |
| ~           | ~                                | Joanne Taylor        |         |
| ~           | ~                                | Mary Tighe           |         |
| ~           | ~                                | Rebecca Tucker       |         |
| ~           | ~                                | Rebecca Twemlow      |         |
| ~           | ~                                | Elena Umbrurescu     |         |
| ~           | ~                                | Rebecca Wallbutton   |         |
| ~           | ~                                | Joshua Woollven      |         |
| ~           | ~                                | Jasmine Youens       |         |
| ~           | ~                                | Robert Zorica        |         |
| Taunton, UK | Taunton and Somerset Hospital    | Jan Ashcroft         |         |
| ~           | ~                                | Jarrold Dunn         |         |
| ~           | ~                                | Ruaraidh MacDonagh   |         |
| ~           | ~                                | Judith Mathie        |         |
| ~           | ~                                | Rebecca Tucker       |         |
| Torquay, UK | Torbay District General Hospital | Anna Lydon           | PI      |

## INVESTIGATORS AND COLLABORATORS: SITE STAFF

Staff on site delegation logs

| City | Care_Site | Person_Name          | Site_PI |
|------|-----------|----------------------|---------|
| ~    | ~         | Fiona Roberts        | Co-I    |
| ~    | ~         | Michele Allison      |         |
| ~    | ~         | Kenneth Almedilla    |         |
| ~    | ~         | Emmie Arbury         |         |
| ~    | ~         | Victoria Bell        |         |
| ~    | ~         | Martyn Blundell      |         |
| ~    | ~         | Lauren Blunt         |         |
| ~    | ~         | Jo Blurton           |         |
| ~    | ~         | Mark Brennan         |         |
| ~    | ~         | Catherine Brookman   |         |
| ~    | ~         | Shelley Chamberlain  |         |
| ~    | ~         | Melody Cross         |         |
| ~    | ~         | Donna Cuffe          |         |
| ~    | ~         | Stacey Davies        |         |
| ~    | ~         | Sue Forbes           |         |
| ~    | ~         | Angela Foulds        |         |
| ~    | ~         | Helen Greedus        |         |
| ~    | ~         | Andrew Harford-Brown |         |
| ~    | ~         | Helen Kimber         |         |
| ~    | ~         | Magdi Kirolos        |         |
| ~    | ~         | Ingrid Koehler       |         |
| ~    | ~         | Sally Maddison       |         |
| ~    | ~         | Catherine Marshall   |         |
| ~    | ~         | Robert Mason         |         |
| ~    | ~         | Seamus McDermott     |         |
| ~    | ~         | Jorg Michels         |         |
| ~    | ~         | Lyn Micklewright     |         |
| ~    | ~         | Amy Millington       |         |
| ~    | ~         | Sophie Norman        |         |
| ~    | ~         | Louise Paatz         |         |
| ~    | ~         | Janet Palmer         |         |
| ~    | ~         | Kirsty Pearce        |         |
| ~    | ~         | Christine Rawlings   |         |

## INVESTIGATORS AND COLLABORATORS: SITE STAFF

Staff on site delegation logs

| City           | Care_Site           | Person_Name                | Site_PI |
|----------------|---------------------|----------------------------|---------|
| ~              | ~                   | Sarah Rees                 |         |
| ~              | ~                   | Rajaguru Srinivasan        |         |
| ~              | ~                   | Lorraine Thornton          |         |
| ~              | ~                   | Elaine Vandecandalaere     |         |
| ~              | ~                   | Amanda Vian                |         |
| ~              | ~                   | Beverley Watkins           |         |
| ~              | ~                   | Erica Watts                |         |
| ~              | ~                   | Sally Wells                |         |
| ~              | ~                   | Linda Welsh                |         |
| ~              | ~                   | Sarah Wright               |         |
| Warrington, UK | Warrington Hospital | Isabel Syndikus            | PI      |
| ~              | ~                   | Shaun Tolan                | Co-I    |
| ~              | ~                   | Lucy Berresford            |         |
| ~              | ~                   | Lisa Dobson (nee Child)    |         |
| ~              | ~                   | Jade Keenan                |         |
| ~              | ~                   | Duncan Knowles             |         |
| ~              | ~                   | Lisa Lee                   |         |
| ~              | ~                   | Carrie Lowthian            |         |
| ~              | ~                   | Rebecca Madew (nee Tinker) |         |
| ~              | ~                   | Nemonie Marriott           |         |
| ~              | ~                   | Philip Reynolds            |         |
| ~              | ~                   | Sandra Robinson            |         |
| ~              | ~                   | Andrea Young               |         |
| Warwick, UK    | Warwick Hospital    | Andrew Chan                | PI      |
| ~              | ~                   | Maggie Brown               |         |
| ~              | ~                   | Judith Chettle             |         |
| ~              | ~                   | Jacqui Harris              |         |
| ~              | ~                   | Lyn Hartwell               |         |
| ~              | ~                   | Julia Jones                |         |
| ~              | ~                   | Linda Maher                |         |
| ~              | ~                   | Helen Millage              |         |
| ~              | ~                   | Emily Noonan               |         |
| ~              | ~                   | Eilish O'Neill             |         |

## INVESTIGATORS AND COLLABORATORS: SITE STAFF

Staff on site delegation logs

| City                 | Care_Site                    | Person_Name        | Site_PI |
|----------------------|------------------------------|--------------------|---------|
| ~                    | ~                            | Jackie Sears       |         |
| ~                    | ~                            | Lucy Shafiq        |         |
| ~                    | ~                            | Andrew Stockdale   |         |
| ~                    | ~                            | Donna Walsh        |         |
| ~                    | ~                            | Frances Walsh      |         |
| ~                    | ~                            | Jo Williams        |         |
| Westcliff on Sea, UK | Southend University Hospital | Imtiaz Ahmed       | PI      |
| ~                    | ~                            | Abby Cyriac        | Co-I    |
| ~                    | ~                            | David Tsang        | Co-I    |
| ~                    | ~                            | Sue Bowman         |         |
| ~                    | ~                            | Kelly Buckhorn     |         |
| ~                    | ~                            | Thomas Carr        |         |
| ~                    | ~                            | Olivia Chan        |         |
| ~                    | ~                            | Stuart Chandler    |         |
| ~                    | ~                            | Lesley Cranfield   |         |
| ~                    | ~                            | Tracey Davies      |         |
| ~                    | ~                            | Terry Dowling      |         |
| ~                    | ~                            | Lesley Gooze       |         |
| ~                    | ~                            | Kathryn Hawkesford |         |
| ~                    | ~                            | Andrew Ho          |         |
| ~                    | ~                            | Ken Kennedy        |         |
| ~                    | ~                            | Joana Kyte         |         |
| ~                    | ~                            | Richard Lodge      |         |
| ~                    | ~                            | Tanatswa Mabhoji   |         |
| ~                    | ~                            | Katrina Maitland   |         |
| ~                    | ~                            | Lesley Nichols     |         |
| ~                    | ~                            | Shanas Noor        |         |
| ~                    | ~                            | Ololade Omodunbi   |         |
| ~                    | ~                            | Sreekanth Palvai   |         |
| ~                    | ~                            | Meera Patel        |         |
| ~                    | ~                            | Jan Prejbisz       |         |
| ~                    | ~                            | Amdadur Rahman     |         |
| ~                    | ~                            | Usha Ravichandran  |         |

## INVESTIGATORS AND COLLABORATORS: SITE STAFF

Staff on site delegation logs

| City                  | Care_Site                | Person_Name           | Site_PI |
|-----------------------|--------------------------|-----------------------|---------|
| ~                     | ~                        | Sheila Reece          |         |
| ~                     | ~                        | Rachel Sadan          |         |
| ~                     | ~                        | Naveed Sarwar         |         |
| ~                     | ~                        | Ryan Wong             |         |
| ~                     | ~                        | Nuhu Yaroson          |         |
| Weston Super Mare, UK | Weston General Hospital  | Serena Hilman         | PI      |
| ~                     | ~                        | Thomas Bird           | Co-I    |
| ~                     | ~                        | Tom Wells             | Co-I    |
| ~                     | ~                        | Kathy Beard           |         |
| ~                     | ~                        | Sandra Beech          |         |
| ~                     | ~                        | Debbie Coles          |         |
| ~                     | ~                        | Donna Cotterill       |         |
| ~                     | ~                        | Harvey Dymond         |         |
| ~                     | ~                        | Symeon Eleftheriadis  |         |
| ~                     | ~                        | Rajesh Gamare         |         |
| ~                     | ~                        | Denise Leighton-Price |         |
| ~                     | ~                        | Hugh Lloyd-Jones      |         |
| ~                     | ~                        | Jennifer Maby         |         |
| ~                     | ~                        | Andrew McKendrick     |         |
| ~                     | ~                        | Kristina Owens        |         |
| ~                     | ~                        | Dave Pack             |         |
| ~                     | ~                        | Glenn Saunders        |         |
| ~                     | ~                        | Dawn Simmons          |         |
| ~                     | ~                        | Marjorie Tomlinson    |         |
| ~                     | ~                        | Rachel Warinton       |         |
| ~                     | ~                        | Susan Wilkinson       |         |
| Whitehaven, UK        | West Cumberland Hospital | Fiona Douglas         | PI      |
| ~                     | ~                        | Anil Kumar            | PI      |
| ~                     | ~                        | Angela Birt           |         |
| ~                     | ~                        | Christopher Brewer    |         |
| ~                     | ~                        | Alan Denholm          |         |
| ~                     | ~                        | Charlotte Eyles       |         |
| ~                     | ~                        | Grace Fryer           |         |



## INVESTIGATORS AND COLLABORATORS: SITE STAFF

Staff on site delegation logs

| City      | Care_Site                     | Person_Name          | Site_PI |
|-----------|-------------------------------|----------------------|---------|
| ~         | ~                             | Tim Marshalsea       |         |
| ~         | ~                             | Patricia Nicholls    |         |
| ~         | ~                             | Jonathan Nicoll      |         |
| ~         | ~                             | Muhammad Rahman      |         |
| ~         | ~                             | Norma Sidek          |         |
| ~         | ~                             | Fiona Spence         |         |
| ~         | ~                             | Jenna Wildey         |         |
| ~         | ~                             | Beverley Wilkinson   |         |
| ~         | ~                             | Joanne Wilkinson     |         |
| ~         | ~                             | Fergus Young         |         |
| Wigan, UK | Royal Albert Edward Infirmary | Anna Tran            | PI      |
| ~         | ~                             | Euan Green           | Co-I    |
| ~         | ~                             | Steve Adejumo        |         |
| ~         | ~                             | Julie Barnes         |         |
| ~         | ~                             | David J Bell         |         |
| ~         | ~                             | Jenny Bradshaw       |         |
| ~         | ~                             | Jennifer Cannon      |         |
| ~         | ~                             | Richard Cowan        |         |
| ~         | ~                             | Louise Devereaux     |         |
| ~         | ~                             | Alison Doran         |         |
| ~         | ~                             | Sonia Evans          |         |
| ~         | ~                             | Diane Forrest        |         |
| ~         | ~                             | Elian Green          |         |
| ~         | ~                             | Paul Higham          |         |
| ~         | ~                             | Claire Hill          |         |
| ~         | ~                             | Andrew Hudson        |         |
| ~         | ~                             | Su Kim               |         |
| ~         | ~                             | Sarah Kirk           |         |
| ~         | ~                             | Andrew McPartlin     |         |
| ~         | ~                             | Karen Moss           |         |
| ~         | ~                             | Muthuswamy Nagarajan |         |
| ~         | ~                             | Michael Parks        |         |
| ~         | ~                             | Angela Power         |         |

## INVESTIGATORS AND COLLABORATORS: SITE STAFF

Staff on site delegation logs

| City              | Care_Site                       | Person_Name           | Site_PI |
|-------------------|---------------------------------|-----------------------|---------|
| ~                 | ~                               | Catherine Redshaw     |         |
| ~                 | ~                               | Tonia Louise Selby    |         |
| ~                 | ~                               | Dianna Thompson       |         |
| ~                 | ~                               | Zoe Trumper           |         |
| ~                 | ~                               | Marissa Walters       |         |
| Winchester, UK    | Royal Hampshire County Hospital | Sangeeta Paisey       | PI      |
| ~                 | ~                               | Rao Vuyyuru           | Co-I    |
| ~                 | ~                               | Andrew Adamson        |         |
| ~                 | ~                               | Louise Beattie        |         |
| ~                 | ~                               | Julie Conti           |         |
| ~                 | ~                               | Victoria Corner       |         |
| ~                 | ~                               | Angela Firth          |         |
| ~                 | ~                               | Liz Happle            |         |
| ~                 | ~                               | Ina Hoad              |         |
| ~                 | ~                               | Lesley Hollister      |         |
| ~                 | ~                               | Abigail Hughes        |         |
| ~                 | ~                               | Lauriane Kerwood      |         |
| ~                 | ~                               | Carley Merritt        |         |
| ~                 | ~                               | Christina Narh        |         |
| ~                 | ~                               | Fasar Sarwar          |         |
| ~                 | ~                               | Jackie Smith          |         |
| ~                 | ~                               | Anna Song             |         |
| Wolverhampton, UK | New Cross Hospital              | Ian Sayers            | PI      |
| ~                 | ~                               | Syed Abdullah Bukhari | Co-I    |
| ~                 | ~                               | Amrita Solanki        | Co-I    |
| ~                 | ~                               | Amarpal Bains         |         |
| ~                 | ~                               | Ann Bentley           |         |
| ~                 | ~                               | Emily Carter          |         |
| ~                 | ~                               | Vanda Carter          |         |
| ~                 | ~                               | Mark Churn            |         |
| ~                 | ~                               | Peter Cooke           |         |
| ~                 | ~                               | Georgi Georgiev       |         |
| ~                 | ~                               | Anna Grant            |         |

## INVESTIGATORS AND COLLABORATORS: SITE STAFF

Staff on site delegation logs

| City          | Care_Site                     | Person_Name             | Site_PI |
|---------------|-------------------------------|-------------------------|---------|
| ~             | ~                             | Kay Hadlington          |         |
| ~             | ~                             | Uttara Karnik           |         |
| ~             | ~                             | Kelly Kauldhar          |         |
| ~             | ~                             | Pek Keng-Koh            |         |
| ~             | ~                             | Christine Kirk          |         |
| ~             | ~                             | Claire Lomas            |         |
| ~             | ~                             | Nataliya Martynyuk      |         |
| ~             | ~                             | Joanne Mundy            |         |
| ~             | ~                             | Renita Pawaroo          |         |
| ~             | ~                             | Bajinder Rai            |         |
| ~             | ~                             | Jason Rogers            |         |
| ~             | ~                             | Sharon Rudge            |         |
| ~             | ~                             | Gurminder Sahota        |         |
| ~             | ~                             | Emma Sharman            |         |
| ~             | ~                             | Debbie Spruce           |         |
| ~             | ~                             | Arvind Tripathy         |         |
| ~             | ~                             | Davina Warrender        |         |
| Worcester, UK | Worcestershire Royal Hospital | Lisa Capaldi            | PI      |
| ~             | ~                             | Menna Fouda             | Co-I    |
| ~             | ~                             | KamalNayan Gupta        | Co-I    |
| ~             | ~                             | Ayyaz Munawar           | Co-I    |
| ~             | ~                             | Susan Anderson          |         |
| ~             | ~                             | Khin Aye                |         |
| ~             | ~                             | Dagmara Bak             |         |
| ~             | ~                             | Jo Bowen                |         |
| ~             | ~                             | Kristy Cleary           |         |
| ~             | ~                             | Sue Davies              |         |
| ~             | ~                             | Paul Flinders           |         |
| ~             | ~                             | Janet Forkes            |         |
| ~             | ~                             | Monica Gauntlett        |         |
| ~             | ~                             | Alison Harrison         |         |
| ~             | ~                             | Jennifer Healey-Mariano |         |
| ~             | ~                             | Hayley Hodson           |         |

## INVESTIGATORS AND COLLABORATORS: SITE STAFF

Staff on site delegation logs

| City         | Care_Site         | Person_Name                | Site_PI |
|--------------|-------------------|----------------------------|---------|
| ~            | ~                 | Amanda Holdsworth          |         |
| ~            | ~                 | Bartlomeij Kurec           |         |
| ~            | ~                 | Zeeshaan Parvez            |         |
| ~            | ~                 | Jayadevkumar Pawadshetti   |         |
| ~            | ~                 | Heather Perry              |         |
| ~            | ~                 | Patricia Rimell            |         |
| ~            | ~                 | Alison Rosoman             |         |
| ~            | ~                 | Asha Sivapalasantharam     |         |
| ~            | ~                 | Sally Stringer (pr. Davis) |         |
| ~            | ~                 | Jacob Taylor               |         |
| ~            | ~                 | Helen Tranter              |         |
| ~            | ~                 | Jayne Tyler                |         |
| ~            | ~                 | Ann White                  |         |
| ~            | ~                 | Nicola Williams            |         |
| Worthing, UK | Worthing Hospital | Ashok Nikapota             | PI      |
| ~            | ~                 | David Bloomfield           | Ex-PI   |
| ~            | ~                 | Irvin Balagosa             |         |
| ~            | ~                 | Stephanie Brown            |         |
| ~            | ~                 | Fiona Castell              |         |
| ~            | ~                 | Dawn Crowe (nee Hughes)    |         |
| ~            | ~                 | Marian Flynn-Batham        |         |
| ~            | ~                 | Linda Folkes               |         |
| ~            | ~                 | Sarah Funnell              |         |
| ~            | ~                 | Jeanette Gilbert           |         |
| ~            | ~                 | Raquel Gomez-Marcos        |         |
| ~            | ~                 | Celia Gonzalez             |         |
| ~            | ~                 | Sarah House                |         |
| ~            | ~                 | Helen Jones                |         |
| ~            | ~                 | Sarah Kimber               |         |
| ~            | ~                 | Jordi Margalef             |         |
| ~            | ~                 | Leanne Mills               |         |
| ~            | ~                 | Sally Moore                |         |
| ~            | ~                 | George Plataniotis         |         |

## INVESTIGATORS AND COLLABORATORS: SITE STAFF

Staff on site delegation logs

| City       | Care_Site                | Person_Name       | Site_PI |
|------------|--------------------------|-------------------|---------|
| ~          | ~                        | Susan Rockall     |         |
| ~          | ~                        | Matthew Smith     |         |
| ~          | ~                        | Yvette Thirlwall  |         |
| ~          | ~                        | Tan Tsawayo       |         |
| ~          | ~                        | Nikki Turner      |         |
| ~          | ~                        | Wendy Wood        |         |
| Yeovil, UK | Yeovil District Hospital | Tim Porter        | PI      |
| ~          | ~                        | Sabri Ahmed       | Co-I    |
| ~          | ~                        | Erica Beaumont    | Co-I    |
| ~          | ~                        | Joanna Allison    |         |
| ~          | ~                        | Zenaida Armstrong |         |
| ~          | ~                        | Claire Barron     |         |
| ~          | ~                        | Nigel Beer        |         |
| ~          | ~                        | Kate Beesley      |         |
| ~          | ~                        | Debbie Cole       |         |
| ~          | ~                        | Sunil Daryanani   |         |
| ~          | ~                        | Sarah De Bruijn   |         |
| ~          | ~                        | David Donaldson   |         |
| ~          | ~                        | Tracey Duckett    |         |
| ~          | ~                        | Shirley Fox       |         |
| ~          | ~                        | Emma Gray         |         |
| ~          | ~                        | Hassan Hameed     |         |
| ~          | ~                        | Michelle Kotze    |         |
| ~          | ~                        | David Laws        |         |
| ~          | ~                        | Jess Perry        |         |
| ~          | ~                        | Lucy Pippard      |         |
| ~          | ~                        | Charlotte Reeves  |         |
| ~          | ~                        | Kerry Rennie      |         |
| ~          | ~                        | Geoffrey Sparrow  |         |
| ~          | ~                        | Amanda Sweet      |         |
| ~          | ~                        | Pamela White      |         |
| York, UK   | University of York       | Mark Schulpher    |         |
| York, UK   | York District Hospital   | Paul Brittain     |         |

## INVESTIGATORS AND COLLABORATORS: SITE STAFF

Staff on site delegation logs

| City     | Care_Site              | Person_Name         | Site_PI |
|----------|------------------------|---------------------|---------|
| ~        | ~                      | Claire Brookes      |         |
| ~        | ~                      | Flor Davies         |         |
| ~        | ~                      | Cheryl Donne        |         |
| ~        | ~                      | Mark Fearnley       |         |
| ~        | ~                      | Sally Gilroy        |         |
| York, UK | York Teaching Hospital | Joji Joseph         | PI      |
| ~        | ~                      | Ben Blake-James     | Co-I    |
| ~        | ~                      | David Bottomley     | Co-I    |
| ~        | ~                      | Russ Wilson         | Co-I    |
| ~        | ~                      | Mark Aldous         |         |
| ~        | ~                      | Ornella Belvedere   |         |
| ~        | ~                      | Paul Brittain       |         |
| ~        | ~                      | Claire Brookes      |         |
| ~        | ~                      | Poppy Cottrell-Howe |         |
| ~        | ~                      | Tracey Dorey        |         |
| ~        | ~                      | Mark Elliott        |         |
| ~        | ~                      | Richard Evans       |         |
| ~        | ~                      | Fereshteh Fallah    |         |
| ~        | ~                      | Jayne Hammond       |         |
| ~        | ~                      | Tom Hearfield       |         |
| ~        | ~                      | Jo Ingham           |         |
| ~        | ~                      | Laura Jeffery       |         |
| ~        | ~                      | Kay Kell            |         |
| ~        | ~                      | Prithivi Maheswaran |         |
| ~        | ~                      | Lisa Mole           |         |
| ~        | ~                      | Daniel Petty        |         |
| ~        | ~                      | Kate Ritchie        |         |
| ~        | ~                      | Abigail Rowbotham   |         |
| ~        | ~                      | Paula Strider       |         |
| ~        | ~                      | Debora Twydell      |         |
| ~        | ~                      | John Wightman       |         |
| ~        | ~                      | Paul Wood           |         |
| ~        | ~                      | Emily Worrall       |         |

## INVESTIGATORS AND COLLABORATORS: SITE STAFF

Staff on site delegation logs

| City           | Care_Site                                   | Person_Name             | Site_PI |
|----------------|---------------------------------------------|-------------------------|---------|
| Basel, CH      | Universitätsspital Basel                    | Cyrill Rentsch          | PI      |
| ~              | ~                                           | Frank Stenner-Liewen    | Co-I    |
| ~              | ~                                           | Alexander Bachmann      |         |
| ~              | ~                                           | Nicole Ebinger          |         |
| ~              | ~                                           | Mana Farsad             |         |
| ~              | ~                                           | Eloise Kremer           |         |
| ~              | ~                                           | Simone Marini           |         |
| ~              | ~                                           | Kristina Muller         |         |
| ~              | ~                                           | Nicole Neumann          |         |
| ~              | ~                                           | N Ott                   |         |
| ~              | ~                                           | Heike Puschel           |         |
| ~              | ~                                           | Christoph Rochlitz      |         |
| ~              | ~                                           | Bettina Seifest         |         |
| ~              | ~                                           | M Timmermann            |         |
| ~              | ~                                           | Stephen Wyler           |         |
| Bellinzona, CH | Istituto Oncologico della Svizzera Italiana | Ricardo Pereira Mestre  | PI      |
| ~              | ~                                           | Enrico Roggero          | PI      |
| ~              | ~                                           | Ngwa Che Azinwi         |         |
| ~              | ~                                           | Carolina De Almeida     |         |
| ~              | ~                                           | Maria Delgrande         |         |
| ~              | ~                                           | Vittoria Espeli         |         |
| ~              | ~                                           | Eloise Kremer           |         |
| ~              | ~                                           | Anna Llado              |         |
| ~              | ~                                           | Barbara Marongiu        |         |
| ~              | ~                                           | Michele Moro            |         |
| ~              | ~                                           | Gianfranco Pesce        |         |
| ~              | ~                                           | Sabine Van Den Bosch    |         |
| Berne, CH      | Inselspital (University Hospital Berne)     | Jörg Beyer              | PI      |
| ~              | ~                                           | Daniel Aebersold        |         |
| ~              | ~                                           | Anna-Katharina Herrmann |         |
| ~              | ~                                           | Eloise Kremer           |         |
| ~              | ~                                           | Anselm Lafita           |         |
| ~              | ~                                           | Susan Meierhans         |         |

## INVESTIGATORS AND COLLABORATORS: SITE STAFF

Staff on site delegation logs

| City         | Care_Site                                       | Person_Name              | Site_PI |
|--------------|-------------------------------------------------|--------------------------|---------|
| ~            | ~                                               | Timo Nannen              |         |
| ~            | ~                                               | Kathi Ochsner            |         |
| ~            | ~                                               | Simone Rimoldi           |         |
| ~            | ~                                               | Beat Roth                |         |
| ~            | ~                                               | George Thalmann          |         |
| ~            | ~                                               | Barbara Uhlmann          |         |
| ~            | ~                                               | Antje Ulrich             |         |
| ~            | ~                                               | Martin Waeber            |         |
| Biel, CH     | Spitalzentrum Biel                              | Markus Borner            | PI      |
| ~            | ~                                               | Silvia Hanselmann        |         |
| ~            | ~                                               | Eloise Kremer            |         |
| ~            | ~                                               | Annette Winkler Vatter   |         |
| ~            | ~                                               | Béatrice Zimmerli Schwab |         |
| Chur, CH     | Kantonsspital Graubünden                        | Raeto Strebel            | PI      |
| ~            | ~                                               | Richard Cathomas         |         |
| ~            | ~                                               | Dirk Kienle              |         |
| ~            | ~                                               | Eloise Kremer            |         |
| ~            | ~                                               | Gabriela Manetsch        |         |
| ~            | ~                                               | M Mark                   |         |
| ~            | ~                                               | Radmila Moudry           |         |
| ~            | ~                                               | Michael Schwitter        |         |
| ~            | ~                                               | Roger von Moos           |         |
| Lausanne, CH | Centre Hospitalier Universitaire Vaudois (CHUV) | Dominik Berthold         | PI      |
| ~            | ~                                               | May-Lucie Meyer          | Co-I    |
| ~            | ~                                               | Alice Abdallah           |         |
| ~            | ~                                               | Tewfik Abedlaziz         |         |
| ~            | ~                                               | Veronica Aedo            |         |
| ~            | ~                                               | Catherine Bender         |         |
| ~            | ~                                               | Galaad Bernard           |         |
| ~            | ~                                               | Yohan Boillat            |         |
| ~            | ~                                               | Floriane Bouilly         |         |
| ~            | ~                                               | Anna-Sophia Briod        |         |
| ~            | ~                                               | Carmen Castagna          |         |



## INVESTIGATORS AND COLLABORATORS: SITE STAFF

Staff on site delegation logs

| City | Care_Site | Person_Name             | Site_PI |
|------|-----------|-------------------------|---------|
| ~    | ~         | Anabela Costa           |         |
| ~    | ~         | Antonella Diciolla      |         |
| ~    | ~         | Nathalie Divorne        |         |
| ~    | ~         | Akram Farhat            |         |
| ~    | ~         | Sabine Galland          |         |
| ~    | ~         | Sylvie Haudidier        |         |
| ~    | ~         | Fernanda Herrera        |         |
| ~    | ~         | Agnes Hiou Feige        |         |
| ~    | ~         | Nicole James Faresse    |         |
| ~    | ~         | Patrice Jichlinski      |         |
| ~    | ~         | Eloise Kremer           |         |
| ~    | ~         | Fabrice Lalubin         |         |
| ~    | ~         | Sofiya Latifyan         |         |
| ~    | ~         | Cynthia Leclerc         |         |
| ~    | ~         | Margaret McLauchlan     |         |
| ~    | ~         | Benangene Midez         |         |
| ~    | ~         | Sophia Murel            |         |
| ~    | ~         | Kaniana Ntanga Muambayi |         |
| ~    | ~         | Rebecca Oppenheim       |         |
| ~    | ~         | Angela Orcurto          |         |
| ~    | ~         | Louis Parisod           |         |
| ~    | ~         | Claire Perrinjaquet     |         |
| ~    | ~         | Alexandra Rideau        |         |
| ~    | ~         | Hans-peter Roth         |         |
| ~    | ~         | Marc Schnety            |         |
| ~    | ~         | Cosette Schuler         |         |
| ~    | ~         | Norlene Silva           |         |
| ~    | ~         | Sandra Toffanin         |         |
| ~    | ~         | Geert Van Driessche     |         |
| ~    | ~         | Sophie Voegtlin         |         |
| ~    | ~         | Aline Voidey            |         |
| ~    | ~         | Celine Yerly            |         |
| ~    | ~         | Jean-Philippe Zurcher   |         |

## INVESTIGATORS AND COLLABORATORS: SITE STAFF

Staff on site delegation logs

| City           | Care_Site                | Person_Name           | Site_PI |
|----------------|--------------------------|-----------------------|---------|
| Liestal, CH    | Kantonsspital Liestal    | Vanessa Fuhrer        |         |
| ~              | ~                        | Eloise Kremer         |         |
| ~              | ~                        | Andreas Lohri         |         |
| ~              | ~                        | Simone Marini         |         |
| St Gallen, CH  | Kantonsspital St Gallen  | Daniel Engeler        | PI      |
| ~              | ~                        | Aurelius Omlin        | Co-I    |
| ~              | ~                        | Christian Rothermundt | Co-I    |
| ~              | ~                        | Christoph Schwab      | Co-I    |
| ~              | ~                        | Dominik Abt           |         |
| ~              | ~                        | Silke Gillessen       |         |
| ~              | ~                        | Claudia Hormann       |         |
| ~              | ~                        | Mannel Jungi          |         |
| ~              | ~                        | Eloise Kremer         |         |
| ~              | ~                        | Sigrid Patel          |         |
| ~              | ~                        | Stefan Prensser       |         |
| ~              | ~                        | Sibylle Schapper      |         |
| ~              | ~                        | Karin Zuern           |         |
| ~              | ~                        | Karin Zurn            |         |
| St. Gallen, CH | Klinik fur Urologie      | Claudia Hormann       |         |
| ~              | ~                        | Sibylle Schapper      |         |
| Winterthur, CH | Kantonsspital Winterthur | Hubert John           | Ex-PI   |
| ~              | ~                        | Beatrice Brinkers     |         |
| ~              | ~                        | Natalie Fisher        |         |
| ~              | ~                        | Nicole Kradolfer      |         |
| ~              | ~                        | Eloise Kremer         |         |
| ~              | ~                        | Claudia Langer        |         |
| ~              | ~                        | Muller                |         |
| ~              | ~                        | Veronika Nagy         |         |
| ~              | ~                        | Martina Pfitzner      |         |
| ~              | ~                        | Miklos Pless          |         |
| ~              | ~                        | Sabina Schacher       |         |
| ~              | ~                        | SusyAnn Shaw          |         |
| ~              | ~                        | Cindy Wanger          |         |

## INVESTIGATORS AND COLLABORATORS: SITE STAFF

Staff on site delegation logs

| City       | Care_Site                  | Person_Name          | Site_PI |
|------------|----------------------------|----------------------|---------|
| Zurich, CH | Hirslanden Medical Centre  | Razvan Popescu       | PI      |
| ~          | ~                          | Katja Kilcher        |         |
| ~          | ~                          | Eloise Kremer        |         |
| ~          | ~                          | Helen Leemann        |         |
| ~          | ~                          | Eva Lehmann Fueter   |         |
| ~          | ~                          | Sylvie Nuc           |         |
| ~          | ~                          | Klaus Schalk         |         |
| ~          | ~                          | Belinda Schegg       |         |
| ~          | ~                          | Louise Seiler        |         |
| ~          | ~                          | Melanie Stahel       |         |
| ~          | ~                          | Michelle Suppiger    |         |
| Zurich, CH | Triemlispital              | Donat Durr           | PI      |
| ~          | ~                          | Maximillian Asanger  |         |
| ~          | ~                          | Camillo Cetuzzi      |         |
| ~          | ~                          | Irene Hones          |         |
| ~          | ~                          | Eloise Kremer        |         |
| ~          | ~                          | Alexandra Pfister    |         |
| ~          | ~                          | Karin Scheuch        |         |
| ~          | ~                          | Daniele Siciliano    |         |
| ~          | ~                          | Stefan Suter         |         |
| Zurich, CH | University Hospital Zurich | Daniel Fetz          |         |
| ~          | ~                          | Eloise Kremer        |         |
| ~          | ~                          | Michael Muntener     |         |
| ~          | ~                          | Cedric Poyet         |         |
| ~          | ~                          | Frank Stenner-Liewen |         |

## INDUSTRY COLLABORATORS

### **Clovis Oncology**

Support for the STAMPEDE trial has been provided by Clovis Oncology.

### **Janssen**

Laurent Antoni

Joaquin Casariego garcia luben

Ilde Herrygars

Florence Lefresne

Rod Murphy

Mohamed Samir

Support for the STAMPEDE trial has been provided by Janssen.

### **Novartis**

Support for the STAMPEDE trial has been provided by Novartis Pharmaceuticals UK Limited.

### **Sanofi-Aventis**

Paul Cadle

Christine Geffriaud-Ricouard

Support for the STAMPEDE study has been provided by Sanofi-Aventis.

## **PARTICIPANTS**

More than 12,000 people have chosen to participate in STAMPEDE. In addition to their clinical teams, they have been supported by family, friends and other key people. Every person who has participated in the trial is appreciated by the trial team and should be appreciated by the wider public. The findings from clinical trials can change practice for the future, but clinical trials only happen because people find the time and make the effort to support them. Thank you.
